# Supplementary material for: Clinicopathological and prognostic significance of caveolin-1 and ATG4C expression in the epithelial ovarian cancer
Source: PLoS One. 2020 May 13;15(5):e0232235. doi: 10.1371/journal.pone.0232235 (PMC7219755; doi:10.1371/journal.pone.0232235)
Supplement: S2 Data — (XLSX) [file pone.0232235.s004.xlsx]

## Sheet: Original data
	tumor_tissue_site	histological_type	gender	vital_status	survival_time	race_list	tissue_source_site	informed_consent_verified	icd_o_3_site	icd_o_3_histology	icd_10	tissue_prospective_collection_indicator	tissue_retrospective_collection_indicator	age_at_initial_pathologic_diagnosis(0:<60 years; 1:≧60 years)	year_of_initial_pathologic_diagnosis	person_neoplasm_cancer_status	day_of_form_completion	month_of_form_completion	year_of_form_completion	ethnicity	other_dx	history_of_neoadjuvant_treatment	karnofsky_performance_score	eastern_cancer_oncology_group	performance_status_scale_timing	neoplasm_histologic_grade	residual_tumor	tumor_residual_disease	jewish_origin	anatomic_neoplasm_subdivision	initial_pathologic_diagnosis_method	init_pathology_dx_method_other	venous_invasion	lymphatic_invasion	radiation_therapy	postoperative_rx_tx	primary_therapy_outcome_success	has_new_tumor_events_information	has_drugs_information	has_radiations_information	has_follow_ups_information	project	stage_event_system_version	stage	stage_event_clinical_stage	stage_event_pathologic_stage	stage_event_tnm_categories	stage_event_psa	stage_event_gleason_grading
363	Ovary	Serous Cystadenocarcinoma	FEMALE	Alive	145	WHITE	61	YES	C56.9	8441-03-01	C56.9	unknown	unknown	0	2009	TUMOR FREE	7	12	2009	NOT HISPANIC OR LATINO	unknown	No	NA	NA	unknown	G3	unknown	No Macroscopic disease	unknown	Bilateral	Tumor resection	unknown	NO	NO	unknown	unknown	unknown	NO	YES	NO	YES	TCGA-OV	NA	3	Stage IIIC	NA	NA	NA	NA
47	Ovary	Serous Cystadenocarcinoma	FEMALE	Dead	1123	BLACK OR AFRICAN AMERICAN	10	YES	C56.9	8441-03-01	C56.9	unknown	unknown	1	2005	WITH TUMOR	6	3	2009	NOT HISPANIC OR LATINO	unknown	No	NA	0	Pre-Adjuvant Therapy	G3	unknown	>20 mm	unknown	Bilateral	Tumor resection	unknown	unknown	YES	unknown	unknown	unknown	NO	YES	NO	YES	TCGA-OV	NA	3	Stage IIIC	NA	NA	NA	NA
172	Ovary	Serous Cystadenocarcinoma	FEMALE	Alive	277	WHITE	24	YES	C56.9	8441-03-01	C56.9	unknown	unknown	1	2008	TUMOR FREE	13	5	2009	unknown	unknown	No	NA	NA	unknown	G3	unknown	1-10 mm	unknown	Right	Tumor resection	unknown	unknown	unknown	unknown	unknown	unknown	NO	YES	NO	YES	TCGA-OV	NA	3	Stage IIIC	NA	NA	NA	NA
49	Ovary	Serous Cystadenocarcinoma	FEMALE	Dead	636	WHITE	10	YES	C56.9	8441-03-01	C56.9	unknown	unknown	1	2002	WITH TUMOR	6	3	2009	unknown	unknown	No	NA	2	unknown	G3	unknown	>20 mm	unknown	Bilateral	unknown	unknown	unknown	unknown	unknown	unknown	unknown	YES	YES	NO	YES	TCGA-OV	NA	3	Stage IIIC	NA	NA	NA	NA
188	Ovary	Serous Cystadenocarcinoma	FEMALE	Dead	312	WHITE	24	YES	C56.9	8441-03-01	C56.9	unknown	unknown	1	1997	WITH TUMOR	13	5	2009	unknown	unknown	No	NA	NA	unknown	G3	unknown	1-10 mm	unknown	Bilateral	Tumor resection	unknown	unknown	YES	unknown	unknown	unknown	YES	YES	NO	YES	TCGA-OV	NA	3	Stage IIIC	NA	NA	NA	NA
176	Ovary	Serous Cystadenocarcinoma	FEMALE	Dead	820	BLACK OR AFRICAN AMERICAN	24	YES	C56.9	8441-03-01	C56.9	unknown	unknown	1	2000	WITH TUMOR	2	6	2009	unknown	unknown	No	NA	NA	unknown	G3	unknown	1-10 mm	unknown	Bilateral	Tumor resection	unknown	unknown	unknown	unknown	unknown	unknown	YES	YES	NO	YES	TCGA-OV	NA	3	Stage IIIC	NA	NA	NA	NA
99	Ovary	Serous Cystadenocarcinoma	FEMALE	Alive	2237	WHITE	13	YES	C56.9	8441-03-01	C56.9	unknown	unknown	1	2002	TUMOR FREE	31	3	2009	NOT HISPANIC OR LATINO	unknown	No	80	NA	Pre-Adjuvant Therapy	G3	unknown	unknown	unknown	unknown	Fine needle aspiration biopsy	unknown	unknown	unknown	unknown	unknown	unknown	NO	YES	NO	YES	TCGA-OV	NA	3	Stage IIIC	NA	NA	NA	NA
270	Ovary	Serous Cystadenocarcinoma	FEMALE	Dead	949	WHITE	29	YES	C56.9	8441-03-01	C56.9	unknown	unknown	1	2003	WITH TUMOR	2	6	2009	unknown	unknown	No	NA	1	Other	G3	unknown	>20 mm	unknown	Bilateral	Tumor resection	unknown	unknown	unknown	unknown	unknown	unknown	YES	YES	NO	YES	TCGA-OV	NA	3	Stage IIIC	NA	NA	NA	NA
19	Ovary	Serous Cystadenocarcinoma	FEMALE	Dead	871	WHITE	4	YES	C56.9	8441-03-01	C56.9	unknown	unknown	0	2003	unknown	2	6	2009	unknown	unknown	No	NA	0	Pre-Adjuvant Therapy	G2	unknown	1-10 mm	unknown	unknown	Cytology (e.g. Peritoneal or pleural fluid)	unknown	unknown	unknown	unknown	unknown	unknown	YES	YES	NO	YES	TCGA-OV	NA	3	Stage IIIC	NA	NA	NA	NA
263	Ovary	Serous Cystadenocarcinoma	FEMALE	Dead	2400	WHITE	29	YES	C56.9	8441-03-01	C56.9	unknown	unknown	0	1992	WITH TUMOR	2	6	2009	unknown	unknown	No	NA	NA	unknown	G2	unknown	unknown	unknown	Bilateral	Tumor resection	unknown	YES	unknown	unknown	unknown	unknown	YES	YES	YES	YES	TCGA-OV	NA	3	Stage IIIC	NA	NA	NA	NA
63	Ovary	Serous Cystadenocarcinoma	FEMALE	Alive	247	WHITE	13	YES	C56.9	8441-03-01	C56.9	unknown	unknown	0	2008	TUMOR FREE	25	2	2009	NOT HISPANIC OR LATINO	unknown	No	NA	NA	unknown	G3	unknown	No Macroscopic disease	unknown	Bilateral	Tumor resection	unknown	unknown	unknown	unknown	unknown	unknown	YES	YES	NO	YES	TCGA-OV	NA	3	Stage IIIC	NA	NA	NA	NA
115	Ovary	Serous Cystadenocarcinoma	FEMALE	Dead	701	WHITE	20	YES	C56.9	8441-03-01	C56.9	unknown	unknown	1	2004	WITH TUMOR	23	2	2009	NOT HISPANIC OR LATINO	unknown	No	NA	NA	unknown	G3	unknown	1-10 mm	unknown	Bilateral	Fine needle aspiration biopsy	unknown	unknown	unknown	unknown	unknown	unknown	YES	YES	NO	YES	TCGA-OV	NA	3	Stage IIIC	NA	NA	NA	NA
375	Ovary	Serous Cystadenocarcinoma	FEMALE	Dead	24	BLACK OR AFRICAN AMERICAN	VG	YES	C56.9	8460-03-01	C56.9	YES	NO	0	2013	WITH TUMOR	25	3	2014	NOT HISPANIC OR LATINO	No	No	50	4	Other	GB	R2	>20 mm	unknown	Right	Excisional Biopsy	unknown	unknown	unknown	NO	YES	unknown	NO	YES	NO	NO	TCGA-OV	NA	4	Stage IV	NA	NA	NA	NA
254	Ovary	Serous Cystadenocarcinoma	FEMALE	Dead	31	WHITE	25	YES	C56.9	8441-03-01	C56.9	unknown	unknown	1	2003	unknown	5	1	2010	NOT HISPANIC OR LATINO	unknown	No	NA	NA	unknown	G3	unknown	11-20 mm	unknown	Bilateral	Tumor resection	unknown	unknown	unknown	unknown	unknown	unknown	NO	NO	NO	YES	TCGA-OV	NA	4	Stage IV	NA	NA	NA	NA
376	Ovary	Serous Cystadenocarcinoma	FEMALE	Alive	245	BLACK OR AFRICAN AMERICAN	WR	YES	C56.9	8441-03-01	C56.9	NO	YES	1	2013	WITH TUMOR	6	3	2014	NOT HISPANIC OR LATINO	No	No	NA	1	Pre-Adjuvant Therapy	G3	unknown	unknown	unknown	Right	Tumor resection	unknown	YES	YES	NO	YES	Progressive Disease	YES	YES	NO	YES	TCGA-OV	NA	3	Stage IIIC	NA	NA	NA	NA
45	Ovary	Serous Cystadenocarcinoma	FEMALE	Dead	1000	WHITE	10	YES	C56.9	8441-03-01	C56.9	unknown	unknown	0	2002	WITH TUMOR	6	3	2009	unknown	unknown	No	NA	1	Preoperative	G3	unknown	1-10 mm	unknown	Bilateral	Tumor resection	unknown	NO	unknown	unknown	unknown	unknown	YES	YES	NO	YES	TCGA-OV	NA	3	Stage IIIC	NA	NA	NA	NA
295	Ovary	Serous Cystadenocarcinoma	FEMALE	Alive	1372	WHITE	29	YES	C56.9	8441-03-01	C56.9	unknown	unknown	0	2005	TUMOR FREE	8	2	2010	unknown	unknown	No	NA	0	Post-Adjuvant Therapy	G3	R1	>20 mm	unknown	Left	Tumor resection	unknown	unknown	YES	unknown	unknown	unknown	NO	YES	NO	YES	TCGA-OV	NA	3	Stage IIIC	NA	NA	NA	NA
180	Ovary	Serous Cystadenocarcinoma	FEMALE	Dead	1579	WHITE	24	YES	C56.9	8441-03-01	C56.9	unknown	unknown	0	1997	WITH TUMOR	13	5	2009	unknown	unknown	No	NA	1	Other	G3	unknown	1-10 mm	unknown	Bilateral	Tumor resection	unknown	unknown	unknown	unknown	unknown	unknown	YES	YES	NO	YES	TCGA-OV	NA	3	Stage IIIC	NA	NA	NA	NA
255	Ovary	Serous Cystadenocarcinoma	FEMALE	Dead	1157	WHITE	25	YES	C56.9	8441-03-01	C56.9	unknown	unknown	1	2003	WITH TUMOR	5	1	2010	NOT HISPANIC OR LATINO	unknown	No	NA	NA	unknown	G3	unknown	11-20 mm	unknown	Left	Tumor resection	unknown	unknown	unknown	unknown	unknown	unknown	YES	YES	NO	YES	TCGA-OV	NA	3	Stage IIIC	NA	NA	NA	NA
170	Ovary	Serous Cystadenocarcinoma	FEMALE	Dead	379	WHITE	24	YES	C56.9	8441-03-01	C56.9	unknown	unknown	1	1998	WITH TUMOR	23	3	2009	unknown	unknown	No	NA	1	Post-Adjuvant Therapy	G3	unknown	>20 mm	unknown	Left	Tumor resection	unknown	unknown	YES	unknown	unknown	unknown	YES	YES	YES	YES	TCGA-OV	NA	3	Stage IIIC	NA	NA	NA	NA
336	Ovary	Serous Cystadenocarcinoma	FEMALE	Alive	165	ASIAN	59	YES	C56.9	8441-03-01	C56.9	unknown	unknown	0	2007	TUMOR FREE	12	2	2010	NOT HISPANIC OR LATINO	unknown	No	NA	NA	unknown	G3	R0	No Macroscopic disease	unknown	Bilateral	Tumor resection	unknown	NO	NO	unknown	unknown	unknown	NO	YES	NO	YES	TCGA-OV	NA	3	Stage IIIA	NA	NA	NA	NA
11	Ovary	Serous Cystadenocarcinoma	FEMALE	Dead	1348	WHITE	4	YES	C56.9	8441-03-01	C56.9	unknown	unknown	0	2002	WITH TUMOR	26	3	2009	unknown	unknown	No	NA	1	Pre-Adjuvant Therapy	G3	unknown	1-10 mm	unknown	Bilateral	Tumor resection	unknown	unknown	unknown	unknown	unknown	unknown	YES	YES	NO	YES	TCGA-OV	NA	2	Stage IIC	NA	NA	NA	NA
196	Ovary	Serous Cystadenocarcinoma	FEMALE	Alive	116	WHITE	24	YES	C56.9	8441-03-01	C56.9	unknown	unknown	0	2009	unknown	2	6	2009	unknown	unknown	No	NA	NA	unknown	G3	unknown	1-10 mm	unknown	Bilateral	Tumor resection	unknown	unknown	unknown	unknown	unknown	unknown	NO	YES	NO	YES	TCGA-OV	NA	3	Stage IIIC	NA	NA	NA	NA
328	Ovary	Serous Cystadenocarcinoma	FEMALE	Alive	763	WHITE	57	YES	C56.9	8441-03-01	C56.9	unknown	unknown	0	2007	TUMOR FREE	7	1	2010	NOT HISPANIC OR LATINO	unknown	No	NA	NA	unknown	G3	R0	No Macroscopic disease	unknown	Bilateral	Tumor resection	unknown	YES	YES	unknown	unknown	unknown	NO	YES	NO	YES	TCGA-OV	NA	3	Stage IIIC	NA	NA	NA	NA
189	Ovary	Serous Cystadenocarcinoma	FEMALE	Dead	524	WHITE	24	YES	C56.9	8441-03-01	C56.9	unknown	unknown	0	1999	WITH TUMOR	2	6	2009	unknown	unknown	No	NA	NA	unknown	G3	unknown	1-10 mm	unknown	Bilateral	Tumor resection	unknown	unknown	unknown	unknown	unknown	unknown	YES	YES	NO	YES	TCGA-OV	NA	3	Stage IIIB	NA	NA	NA	NA
327	Ovary	Serous Cystadenocarcinoma	FEMALE	Alive	679	WHITE	57	YES	C56.9	8441-03-01	C56.9	unknown	unknown	1	2007	WITH TUMOR	2	6	2009	NOT HISPANIC OR LATINO	unknown	No	NA	NA	unknown	G3	unknown	11-20 mm	unknown	Bilateral	Tumor resection	unknown	YES	YES	unknown	unknown	unknown	YES	YES	NO	YES	TCGA-OV	NA	3	Stage IIIC	NA	NA	NA	NA
333	Ovary	Serous Cystadenocarcinoma	FEMALE	Dead	286	WHITE	59	YES	C56.9	8441-03-01	C56.9	NO	YES	1	2002	WITH TUMOR	29	1	2010	NOT HISPANIC OR LATINO	unknown	No	NA	NA	unknown	G3	unknown	unknown	unknown	Right	Cytology (e.g. Peritoneal or pleural fluid)	unknown	unknown	unknown	unknown	unknown	unknown	NO	NO	NO	NO	TCGA-OV	NA	3	Stage IIIC	NA	NA	NA	NA
83	Ovary	Serous Cystadenocarcinoma	FEMALE	Alive	195	WHITE	13	YES	C56.9	8441-03-01	C56.9	unknown	unknown	1	2008	TUMOR FREE	25	2	2009	NOT HISPANIC OR LATINO	unknown	No	NA	NA	unknown	G3	unknown	No Macroscopic disease	unknown	Right	Tumor resection	unknown	unknown	unknown	unknown	unknown	unknown	YES	YES	NO	YES	TCGA-OV	NA	3	Stage IIIC	NA	NA	NA	NA
325	Ovary	Serous Cystadenocarcinoma	FEMALE	Alive	643	WHITE	57	YES	C56.9	8441-03-01	C56.9	unknown	unknown	0	2007	WITH TUMOR	2	6	2009	NOT HISPANIC OR LATINO	unknown	No	NA	0	Pre-Adjuvant Therapy	G3	unknown	1-10 mm	unknown	Bilateral	Tumor resection	unknown	YES	YES	unknown	unknown	unknown	YES	YES	NO	YES	TCGA-OV	NA	3	Stage IIIC	NA	NA	NA	NA
184	Ovary	Serous Cystadenocarcinoma	FEMALE	Dead	594	WHITE	24	YES	C56.9	8441-03-01	C56.9	unknown	unknown	1	2000	WITH TUMOR	2	6	2009	unknown	unknown	No	NA	NA	unknown	G3	unknown	1-10 mm	unknown	Bilateral	Tumor resection	unknown	unknown	unknown	unknown	unknown	unknown	YES	YES	NO	YES	TCGA-OV	NA	3	Stage IIIC	NA	NA	NA	NA
141	Ovary	Serous Cystadenocarcinoma	FEMALE	Dead	1018	WHITE	23	YES	C56.9	8441-03-01	C56.9	unknown	unknown	0	1998	WITH TUMOR	24	2	2009	NOT HISPANIC OR LATINO	unknown	No	NA	NA	unknown	G3	unknown	11-20 mm	unknown	Left	Tumor resection	unknown	unknown	YES	unknown	unknown	unknown	NO	YES	NO	YES	TCGA-OV	NA	3	Stage IIIC	NA	NA	NA	NA
274	Ovary	Serous Cystadenocarcinoma	FEMALE	Alive	1277	WHITE	29	YES	C56.9	8441-03-01	C56.9	unknown	unknown	0	2006	unknown	2	6	2009	unknown	unknown	No	NA	0	Post-Adjuvant Therapy	G3	unknown	No Macroscopic disease	unknown	Left	Tumor resection	unknown	unknown	NO	unknown	unknown	unknown	YES	YES	NO	YES	TCGA-OV	NA	2	Stage IIC	NA	NA	NA	NA
272	Ovary	Serous Cystadenocarcinoma	FEMALE	Dead	1815	BLACK OR AFRICAN AMERICAN	29	YES	C56.9	8441-03-01	C56.9	unknown	unknown	0	2005	WITH TUMOR	2	6	2009	unknown	unknown	No	NA	0	Post-Adjuvant Therapy	G2	unknown	1-10 mm	unknown	Bilateral	Tumor resection	unknown	unknown	unknown	unknown	unknown	unknown	YES	YES	NO	YES	TCGA-OV	NA	3	Stage IIIC	NA	NA	NA	NA
54	Ovary	Serous Cystadenocarcinoma	FEMALE	Dead	949	WHITE	13	YES	C56.9	8441-03-01	C56.9	unknown	unknown	0	2002	WITH TUMOR	24	2	2009	NOT HISPANIC OR LATINO	unknown	No	NA	NA	unknown	GX	unknown	1-10 mm	unknown	Bilateral	Tumor resection	unknown	unknown	unknown	unknown	unknown	unknown	YES	YES	NO	YES	TCGA-OV	NA	3	Stage IIIC	NA	NA	NA	NA
337	Ovary	Serous Cystadenocarcinoma	FEMALE	Dead	624	BLACK OR AFRICAN AMERICAN	59	YES	C56.9	8441-03-01	C56.9	NO	YES	0	2011	WITH TUMOR	25	6	2013	NOT HISPANIC OR LATINO	Yes	History of Synchronous/Bilateral Malignancy	No	100	0	Preoperative	G3	unknown	unknown	unknown	Right	Tumor resection	unknown	YES	YES	NO	NO	Complete Remission/Response	YES	NO	NO	NO	TCGA-OV	unknown	NA	Stage IC	NA	NA	NA
366	Ovary	Serous Cystadenocarcinoma	FEMALE	Alive	1993	WHITE	61	YES	C56.9	8441-03-01	C56.9	unknown	unknown	1	2003	TUMOR FREE	8	12	2009	unknown	unknown	No	NA	NA	unknown	G2	unknown	11-20 mm	unknown	Bilateral	Tumor resection	unknown	NO	unknown	unknown	unknown	unknown	NO	YES	NO	YES	TCGA-OV	NA	3	Stage IIIC	NA	NA	NA	NA
364	Ovary	Serous Cystadenocarcinoma	FEMALE	Alive	1573	WHITE	61	YES	C56.9	8441-03-01	C56.9	unknown	unknown	0	2004	TUMOR FREE	8	12	2009	unknown	unknown	No	NA	NA	unknown	G3	unknown	No Macroscopic disease	unknown	Bilateral	Tumor resection	unknown	NO	NO	unknown	unknown	unknown	NO	YES	NO	YES	TCGA-OV	NA	3	Stage IIIC	NA	NA	NA	NA
38	Ovary	Serous Cystadenocarcinoma	FEMALE	Dead	138	WHITE	9	YES	C56.9	8441-03-01	C56.9	unknown	unknown	1	1999	WITH TUMOR	3	11	2009	NOT HISPANIC OR LATINO	unknown	No	NA	NA	unknown	G3	unknown	1-10 mm	unknown	Bilateral	Tumor resection	unknown	YES	YES	unknown	unknown	unknown	NO	YES	NO	YES	TCGA-OV	NA	3	Stage IIIC	NA	NA	NA	NA
100	Ovary	Serous Cystadenocarcinoma	FEMALE	Alive	1498	WHITE	13	YES	C56.9	8441-03-01	C56.9	unknown	unknown	1	2004	WITH TUMOR	31	3	2009	NOT HISPANIC OR LATINO	unknown	No	80	NA	Pre-Adjuvant Therapy	G2	unknown	1-10 mm	unknown	Bilateral	Cytology (e.g. Peritoneal or pleural fluid)	unknown	unknown	unknown	unknown	unknown	unknown	YES	YES	NO	YES	TCGA-OV	NA	3	Stage IIIC	NA	NA	NA	NA
346	Ovary	Serous Cystadenocarcinoma	FEMALE	Dead	1089	BLACK OR AFRICAN AMERICAN	61	YES	C56.9	8441-03-01	C56.9	unknown	unknown	1	2005	WITH TUMOR	2	6	2009	unknown	unknown	No	NA	NA	unknown	G3	unknown	1-10 mm	unknown	Right	Tumor resection	unknown	YES	YES	unknown	unknown	unknown	YES	YES	NO	YES	TCGA-OV	NA	3	Stage IIIC	NA	NA	NA	NA
248	Ovary	Serous Cystadenocarcinoma	FEMALE	Dead	1091	WHITE	25	YES	C56.9	8441-03-01	C56.9	unknown	unknown	1	2002	WITH TUMOR	2	6	2009	NOT HISPANIC OR LATINO	unknown	No	NA	NA	unknown	G3	unknown	No Macroscopic disease	unknown	Bilateral	Tumor resection	unknown	unknown	unknown	unknown	unknown	unknown	YES	YES	YES	YES	TCGA-OV	NA	3	Stage IIIC	NA	NA	NA	NA
360	Ovary	Serous Cystadenocarcinoma	FEMALE	Alive	932	ASIAN	61	YES	C56.9	8441-03-01	C56.9	unknown	unknown	0	2007	WITH TUMOR	8	12	2009	NOT HISPANIC OR LATINO	unknown	No	NA	NA	unknown	G2	unknown	No Macroscopic disease	unknown	Bilateral	Tumor resection	unknown	YES	YES	unknown	unknown	unknown	YES	YES	NO	YES	TCGA-OV	NA	2	Stage IIC	NA	NA	NA	NA
42	Ovary	Serous Cystadenocarcinoma	FEMALE	Alive	379	WHITE	9	YES	C56.9	8441-03-01	C56.9	unknown	unknown	1	2008	TUMOR FREE	2	11	2009	HISPANIC OR LATINO	unknown	No	NA	NA	unknown	G3	unknown	No Macroscopic disease	unknown	Bilateral	Tumor resection	unknown	NO	NO	unknown	unknown	unknown	NO	YES	NO	YES	TCGA-OV	NA	3	Stage IIIC	NA	NA	NA	NA
205	Ovary	Serous Cystadenocarcinoma	FEMALE	Dead	1364	WHITE	24	YES	C56.9	8441-03-01	C56.9	unknown	unknown	0	1994	WITH TUMOR	16	3	2010	unknown	unknown	No	NA	NA	unknown	G3	unknown	1-10 mm	unknown	Bilateral	Tumor resection	unknown	unknown	unknown	unknown	unknown	unknown	YES	YES	NO	YES	TCGA-OV	NA	3	Stage IIIA	NA	NA	NA	NA
55	Ovary	Serous Cystadenocarcinoma	FEMALE	Dead	462	WHITE	13	YES	C56.9	8441-03-01	C56.9	unknown	unknown	1	2003	WITH TUMOR	24	2	2009	NOT HISPANIC OR LATINO	unknown	No	NA	NA	unknown	G3	unknown	1-10 mm	unknown	Bilateral	Tumor resection	unknown	unknown	unknown	unknown	unknown	unknown	YES	YES	NO	YES	TCGA-OV	NA	3	Stage IIIC	NA	NA	NA	NA
284	Ovary	Serous Cystadenocarcinoma	FEMALE	Alive	527	WHITE	29	YES	C56.9	8441-03-01	C56.9	unknown	unknown	1	2008	WITH TUMOR	2	6	2009	NOT HISPANIC OR LATINO	unknown	No	NA	2	unknown	G3	unknown	>20 mm	unknown	Bilateral	Tumor resection	unknown	unknown	unknown	unknown	unknown	unknown	YES	YES	NO	YES	TCGA-OV	NA	3	Stage IIIC	NA	NA	NA	NA
199	Ovary	Serous Cystadenocarcinoma	FEMALE	Alive	168	WHITE	24	YES	C56.9	8441-03-01	C56.9	unknown	unknown	1	2009	TUMOR FREE	2	6	2009	unknown	unknown	No	NA	0	Post-Adjuvant Therapy	G3	unknown	1-10 mm	unknown	Bilateral	Tumor resection	unknown	unknown	YES	unknown	unknown	unknown	NO	YES	NO	YES	TCGA-OV	NA	3	Stage IIIC	NA	NA	NA	NA
20	Ovary	Serous Cystadenocarcinoma	FEMALE	Dead	1102	WHITE	4	YES	C56.9	8441-03-01	C56.9	unknown	unknown	0	2004	unknown	2	6	2009	NOT HISPANIC OR LATINO	unknown	No	NA	1	Pre-Adjuvant Therapy	G3	unknown	1-10 mm	unknown	Bilateral	Cytology (e.g. Peritoneal or pleural fluid)	unknown	unknown	unknown	unknown	unknown	unknown	YES	YES	NO	YES	TCGA-OV	NA	3	Stage IIIC	NA	NA	NA	NA
317	Ovary	Serous Cystadenocarcinoma	FEMALE	Dead	695	WHITE	36	YES	C56.9	8441-03-01	C56.9	unknown	unknown	0	2007	WITH TUMOR	2	6	2009	unknown	unknown	No	NA	NA	unknown	G3	unknown	No Macroscopic disease	unknown	Bilateral	Tumor resection	unknown	NO	NO	unknown	unknown	unknown	YES	YES	NO	YES	TCGA-OV	NA	3	Stage IIIB	NA	NA	NA	NA
58	Ovary	Serous Cystadenocarcinoma	FEMALE	Alive	869	WHITE	13	YES	C56.9	8441-03-01	C56.9	unknown	unknown	0	2006	WITH TUMOR	24	2	2009	NOT HISPANIC OR LATINO	unknown	No	NA	NA	unknown	G3	unknown	1-10 mm	unknown	Bilateral	Tumor resection	unknown	unknown	unknown	unknown	unknown	unknown	YES	YES	NO	YES	TCGA-OV	NA	3	Stage IIIC	NA	NA	NA	NA
116	Ovary	Serous Cystadenocarcinoma	FEMALE	Alive	797	WHITE	20	YES	C56.9	8441-03-01	C56.9	unknown	unknown	1	2006	TUMOR FREE	23	2	2009	NOT HISPANIC OR LATINO	unknown	No	NA	0	Post-Adjuvant Therapy	G3	unknown	No Macroscopic disease	unknown	Right	Tumor resection	unknown	unknown	unknown	unknown	unknown	unknown	NO	YES	NO	YES	TCGA-OV	NA	2	Stage IIB	NA	NA	NA	NA
372	Ovary	Serous Cystadenocarcinoma	FEMALE	Alive	3825	WHITE	61	YES	C56.9	8441-03-01	C56.9	unknown	unknown	1	1998	WITH TUMOR	7	12	2009	NOT HISPANIC OR LATINO	unknown	No	NA	NA	unknown	G3	unknown	unknown	unknown	Left	Tumor resection	unknown	unknown	unknown	unknown	unknown	unknown	YES	YES	NO	YES	TCGA-OV	NA	4	Stage IV	NA	NA	NA	NA
39	Ovary	Serous Cystadenocarcinoma	FEMALE	Alive	1919	WHITE	9	YES	C56.9	8441-03-01	C56.9	unknown	unknown	0	2004	TUMOR FREE	3	11	2009	NOT HISPANIC OR LATINO	unknown	No	NA	NA	unknown	G3	unknown	No Macroscopic disease	ASHKENAZI	Bilateral	Tumor resection	unknown	YES	YES	unknown	unknown	unknown	YES	YES	NO	YES	TCGA-OV	NA	3	Stage IIIC	NA	NA	NA	NA
88	Ovary	Serous Cystadenocarcinoma	FEMALE	Alive	184	WHITE	13	YES	C56.9	8441-03-01	C56.9	unknown	unknown	0	2008	TUMOR FREE	20	3	2009	NOT HISPANIC OR LATINO	unknown	No	NA	NA	unknown	G3	unknown	unknown	unknown	Bilateral	Cytology (e.g. Peritoneal or pleural fluid)	unknown	unknown	unknown	unknown	unknown	unknown	YES	YES	NO	YES	TCGA-OV	NA	3	Stage IIIC	NA	NA	NA	NA
13	Ovary	Serous Cystadenocarcinoma	FEMALE	Alive	947	WHITE	4	YES	C56.9	8441-03-01	C56.9	unknown	unknown	1	2003	WITH TUMOR	26	3	2009	NOT HISPANIC OR LATINO	unknown	No	NA	1	Preoperative	G3	unknown	unknown	unknown	Left	Tumor resection	unknown	unknown	NO	unknown	unknown	unknown	YES	YES	NO	YES	TCGA-OV	NA	3	Stage IIIB	NA	NA	NA	NA
197	Ovary	Serous Cystadenocarcinoma	FEMALE	Alive	133	unknown	24	YES	C56.9	8441-03-01	C56.9	unknown	unknown	0	2009	unknown	2	6	2009	unknown	unknown	No	NA	1	Other	G3	unknown	1-10 mm	unknown	Bilateral	Tumor resection	unknown	unknown	YES	unknown	unknown	unknown	NO	YES	NO	YES	TCGA-OV	NA	3	Stage IIIC	NA	NA	NA	NA
154	Ovary	Serous Cystadenocarcinoma	FEMALE	Alive	192	WHITE	24	YES	C56.9	8441-03-01	C56.9	unknown	unknown	0	2008	TUMOR FREE	9	3	2009	unknown	unknown	No	NA	NA	unknown	G3	unknown	1-10 mm	unknown	Bilateral	Tumor resection	unknown	unknown	YES	unknown	unknown	unknown	NO	YES	NO	YES	TCGA-OV	NA	3	Stage IIIC	NA	NA	NA	NA
219	Ovary	Serous Cystadenocarcinoma	FEMALE	Alive	1357	WHITE	24	YES	C56.9	8441-03-01	C56.9	unknown	unknown	1	2006	TUMOR FREE	5	4	2010	unknown	unknown	No	NA	0	Post-Adjuvant Therapy	G3	unknown	1-10 mm	unknown	Bilateral	Tumor resection	unknown	unknown	YES	unknown	unknown	unknown	NO	YES	NO	YES	TCGA-OV	NA	2	Stage IIA	NA	NA	NA	NA
278	Ovary	Serous Cystadenocarcinoma	FEMALE	Dead	2634	WHITE	29	YES	C56.9	8441-03-01	C56.9	unknown	unknown	0	1998	WITH TUMOR	2	6	2009	unknown	unknown	No	NA	2	Post-Adjuvant Therapy	G2	unknown	>20 mm	unknown	Bilateral	Tumor resection	unknown	unknown	unknown	unknown	unknown	unknown	YES	YES	NO	YES	TCGA-OV	NA	4	Stage IV	NA	NA	NA	NA
31	Ovary	Serous Cystadenocarcinoma	FEMALE	Alive	1882	WHITE	9	YES	C56.9	8441-03-01	C56.9	unknown	unknown	1	2004	WITH TUMOR	2	6	2009	NOT HISPANIC OR LATINO	unknown	No	NA	NA	unknown	G2	unknown	No Macroscopic disease	unknown	Bilateral	Tumor resection	unknown	NO	NO	unknown	unknown	unknown	YES	YES	YES	YES	TCGA-OV	NA	2	Stage IIC	NA	NA	NA	NA
66	Ovary	Serous Cystadenocarcinoma	FEMALE	Dead	3260	WHITE	13	YES	C56.9	8441-03-01	C56.9	unknown	unknown	0	1999	WITH TUMOR	20	3	2009	NOT HISPANIC OR LATINO	unknown	No	NA	NA	unknown	G3	unknown	1-10 mm	unknown	Bilateral	Cytology (e.g. Peritoneal or pleural fluid)	unknown	unknown	unknown	unknown	unknown	unknown	YES	YES	NO	YES	TCGA-OV	NA	3	Stage IIIC	NA	NA	NA	NA
124	Ovary	Serous Cystadenocarcinoma	FEMALE	Alive	468	WHITE	23	YES	C56.9	8441-03-01	C56.9	unknown	unknown	0	2007	TUMOR FREE	24	2	2009	NOT HISPANIC OR LATINO	unknown	No	NA	NA	unknown	G3	unknown	1-10 mm	ASHKENAZI	Right	Tumor resection	unknown	unknown	unknown	unknown	unknown	unknown	NO	YES	NO	YES	TCGA-OV	NA	4	Stage IV	NA	NA	NA	NA
22	Ovary	Serous Cystadenocarcinoma	FEMALE	Dead	887	WHITE	9	YES	C56.9	8441-03-01	C56.9	unknown	unknown	1	1998	WITH TUMOR	4	3	2009	NOT HISPANIC OR LATINO	unknown	No	NA	NA	unknown	G3	unknown	11-20 mm	unknown	Right	Tumor resection	unknown	NO	NO	unknown	unknown	unknown	YES	YES	YES	YES	TCGA-OV	NA	2	Stage IIC	NA	NA	NA	NA
72	Ovary	Serous Cystadenocarcinoma	FEMALE	Dead	1319	BLACK OR AFRICAN AMERICAN	13	YES	C56.9	8441-03-01	C56.9	unknown	unknown	0	2003	WITH TUMOR	20	3	2009	NOT HISPANIC OR LATINO	unknown	No	NA	NA	unknown	G3	unknown	11-20 mm	unknown	Bilateral	Cytology (e.g. Peritoneal or pleural fluid)	unknown	unknown	unknown	unknown	unknown	unknown	YES	YES	NO	YES	TCGA-OV	NA	3	Stage IIIC	NA	NA	NA	NA
163	Ovary	Serous Cystadenocarcinoma	FEMALE	Alive	163	WHITE	24	YES	C56.9	8441-03-01	C56.9	unknown	unknown	0	2008	TUMOR FREE	16	4	2009	unknown	unknown	No	NA	NA	unknown	G3	unknown	1-10 mm	unknown	Bilateral	Tumor resection	unknown	unknown	YES	unknown	unknown	unknown	NO	YES	NO	YES	TCGA-OV	NA	3	Stage IIIC	NA	NA	NA	NA
374	Ovary	Serous Cystadenocarcinoma	FEMALE	Alive	190	BLACK OR AFRICAN AMERICAN	OY	YES	C56.9	8441-03-01	C56.9	YES	NO	1	2012	TUMOR FREE	27	2	2013	NOT HISPANIC OR LATINO	No	No	NA	NA	unknown	G3	RX	No Macroscopic disease	unknown	Left	Tumor resection	unknown	NO	NO	unknown	YES	Complete Remission/Response	NO	YES	NO	YES	TCGA-OV	NA	2	Stage IIA	NA	NA	NA	NA
107	Ovary	Serous Cystadenocarcinoma	FEMALE	Alive	134	WHITE	13	YES	C56.9	8441-03-01	C56.9	unknown	unknown	0	2008	TUMOR FREE	31	3	2009	NOT HISPANIC OR LATINO	unknown	No	80	NA	Pre-Adjuvant Therapy	G3	unknown	unknown	unknown	Bilateral	Tumor resection	unknown	unknown	unknown	unknown	unknown	unknown	YES	YES	NO	YES	TCGA-OV	NA	3	Stage IIIC	NA	NA	NA	NA
211	Ovary	Serous Cystadenocarcinoma	FEMALE	Dead	1947	WHITE	24	YES	C56.9	8441-03-01	C56.9	unknown	unknown	0	1996	WITH TUMOR	19	2	2010	unknown	unknown	No	NA	0	Other	G3	unknown	1-10 mm	unknown	unknown	Tumor resection	unknown	unknown	unknown	unknown	unknown	unknown	YES	YES	YES	YES	TCGA-OV	NA	3	Stage IIIA	NA	NA	NA	NA
146	Ovary	Serous Cystadenocarcinoma	FEMALE	Alive	232	BLACK OR AFRICAN AMERICAN	24	YES	C56.9	8441-03-01	C56.9	unknown	unknown	1	2008	WITH TUMOR	24	2	2009	NOT HISPANIC OR LATINO	unknown	No	NA	NA	unknown	G3	unknown	>20 mm	unknown	Bilateral	Tumor resection	unknown	unknown	YES	unknown	unknown	unknown	NO	YES	NO	YES	TCGA-OV	NA	3	Stage IIIC	NA	NA	NA	NA
251	Ovary	Serous Cystadenocarcinoma	FEMALE	Dead	730	WHITE	25	YES	C56.9	8441-03-01	C56.9	unknown	unknown	1	1993	WITH TUMOR	2	6	2009	NOT HISPANIC OR LATINO	unknown	No	NA	NA	unknown	G3	unknown	1-10 mm	unknown	Left	Tumor resection	unknown	unknown	unknown	unknown	unknown	unknown	YES	YES	NO	YES	TCGA-OV	NA	3	Stage IIIC	NA	NA	NA	NA
322	Ovary	Serous Cystadenocarcinoma	FEMALE	Alive	751	WHITE	36	YES	C56.9	8441-03-01	C56.9	unknown	unknown	1	2007	WITH TUMOR	2	6	2009	unknown	unknown	No	NA	0	Pre-Adjuvant Therapy	G3	unknown	No Macroscopic disease	unknown	Left	Cytology (e.g. Peritoneal or pleural fluid)	unknown	unknown	unknown	unknown	unknown	unknown	YES	YES	NO	YES	TCGA-OV	NA	2	Stage IIC	NA	NA	NA	NA
53	Ovary	Serous Cystadenocarcinoma	FEMALE	Dead	377	WHITE	13	YES	C56.9	8441-03-01	C56.9	unknown	unknown	0	2002	WITH TUMOR	24	2	2009	HISPANIC OR LATINO	unknown	No	NA	NA	unknown	G3	unknown	1-10 mm	unknown	Bilateral	Cytology (e.g. Peritoneal or pleural fluid)	unknown	unknown	unknown	unknown	unknown	unknown	YES	YES	NO	YES	TCGA-OV	NA	3	Stage IIIC	NA	NA	NA	NA
246	Ovary	Serous Cystadenocarcinoma	FEMALE	Dead	1799	WHITE	25	YES	C56.9	8441-03-01	C56.9	unknown	unknown	1	2002	WITH TUMOR	2	6	2009	NOT HISPANIC OR LATINO	unknown	No	NA	NA	unknown	G3	unknown	1-10 mm	unknown	Bilateral	Tumor resection	unknown	unknown	unknown	unknown	unknown	unknown	YES	YES	NO	YES	TCGA-OV	NA	4	Stage IV	NA	NA	NA	NA
52	Ovary	Serous Cystadenocarcinoma	FEMALE	Dead	83	WHITE	13	YES	C56.9	8441-03-01	C56.9	unknown	unknown	1	2002	WITH TUMOR	24	2	2009	HISPANIC OR LATINO	unknown	No	80	NA	Preoperative	G3	unknown	1-10 mm	unknown	Right	Excisional Biopsy	unknown	unknown	unknown	unknown	unknown	unknown	YES	YES	NO	YES	TCGA-OV	NA	4	Stage IV	NA	NA	NA	NA
330	Ovary	Serous Cystadenocarcinoma	FEMALE	Alive	5481	WHITE	59	YES	C56.9	8441-03-01	C56.9	unknown	unknown	0	1994	TUMOR FREE	29	1	2010	NOT HISPANIC OR LATINO	unknown	No	NA	NA	unknown	G3	unknown	unknown	unknown	Bilateral	Tumor resection	unknown	unknown	unknown	unknown	unknown	unknown	NO	NO	NO	YES	TCGA-OV	NA	3	Stage IIIC	NA	NA	NA	NA
309	Ovary	Serous Cystadenocarcinoma	FEMALE	Alive	571	WHITE	31	YES	C56.9	8441-03-01	C56.9	unknown	unknown	1	2007	WITH TUMOR	19	10	2009	NOT HISPANIC OR LATINO	unknown	No	NA	1	Pre-Adjuvant Therapy	G2	unknown	1-10 mm	unknown	Bilateral	Tumor resection	unknown	NO	NO	unknown	unknown	unknown	YES	YES	NO	YES	TCGA-OV	NA	3	Stage IIIC	NA	NA	NA	NA
357	Ovary	Serous Cystadenocarcinoma	FEMALE	Alive	441	WHITE	61	YES	C56.9	8441-03-01	C56.9	unknown	unknown	1	2008	WITH TUMOR	8	12	2009	NOT HISPANIC OR LATINO	unknown	No	NA	NA	unknown	G3	unknown	No Macroscopic disease	unknown	Bilateral	Tumor resection	unknown	YES	YES	unknown	unknown	unknown	YES	YES	NO	YES	TCGA-OV	NA	3	Stage IIIC	NA	NA	NA	NA
329	Ovary	Serous Cystadenocarcinoma	FEMALE	Alive	761	WHITE	57	YES	C56.9	8441-03-01	C56.9	unknown	unknown	1	2004	unknown	10	6	2011	unknown	unknown	No	NA	NA	unknown	unknown	unknown	unknown	unknown	unknown	Tumor resection	unknown	unknown	unknown	unknown	unknown	unknown	NO	NO	NO	YES	TCGA-OV	NA	unknown	unknown	NA	NA	NA	NA
111	Ovary	Serous Cystadenocarcinoma	FEMALE	Alive	119	ASIAN	13	YES	C56.9	8441-03-01	C56.9	unknown	unknown	0	2008	WITH TUMOR	31	3	2009	NOT HISPANIC OR LATINO	unknown	No	60	NA	Pre-Adjuvant Therapy	G3	unknown	>20 mm	unknown	Bilateral	Cytology (e.g. Peritoneal or pleural fluid)	unknown	unknown	unknown	unknown	unknown	unknown	YES	YES	NO	YES	TCGA-OV	NA	4	Stage IV	NA	NA	NA	NA
314	Ovary	Serous Cystadenocarcinoma	FEMALE	Alive	875	unknown	36	YES	C56.9	8441-03-01	C56.9	unknown	unknown	0	2007	WITH TUMOR	2	6	2009	unknown	unknown	No	NA	NA	unknown	G3	unknown	unknown	unknown	Bilateral	Tumor resection	unknown	unknown	NO	unknown	unknown	unknown	YES	YES	NO	YES	TCGA-OV	NA	3	Stage IIIC	NA	NA	NA	NA
338	Ovary	Serous Cystadenocarcinoma	FEMALE	Alive	277	BLACK OR AFRICAN AMERICAN	5X	YES	C56.9	8460-03-01	C56.9	YES	NO	1	2013	TUMOR FREE	1	10	2014	unknown	Yes	History of Synchronous/Bilateral Malignancy	No	100	0	Post-Adjuvant Therapy	GX	R0	unknown	unknown	Right	Tumor resection	unknown	NO	NO	NO	YES	Complete Remission/Response	NO	YES	NO	YES	TCGA-OV	unknown	NA	Stage IIC	NA	NA	NA
40	Ovary	Serous Cystadenocarcinoma	FEMALE	Alive	1209	WHITE	9	YES	C56.9	8441-03-01	C56.9	unknown	unknown	1	2005	TUMOR FREE	2	11	2009	NOT HISPANIC OR LATINO	unknown	No	NA	NA	unknown	G3	unknown	No Macroscopic disease	unknown	Left	Tumor resection	unknown	NO	NO	unknown	unknown	unknown	NO	YES	NO	YES	TCGA-OV	NA	3	Stage IIIC	NA	NA	NA	NA
294	Ovary	Serous Cystadenocarcinoma	FEMALE	Alive	1900	WHITE	29	YES	C56.9	8441-03-01	C56.9	unknown	unknown	1	2004	WITH TUMOR	8	2	2010	unknown	unknown	No	NA	0	Post-Adjuvant Therapy	G3	R1	>20 mm	unknown	Left	Tumor resection	unknown	unknown	unknown	unknown	unknown	unknown	YES	YES	NO	YES	TCGA-OV	NA	3	Stage IIIC	NA	NA	NA	NA
244	Ovary	Serous Cystadenocarcinoma	FEMALE	Dead	1162	WHITE	25	YES	C56.9	8441-03-01	C56.9	unknown	unknown	1	2002	unknown	2	6	2009	NOT HISPANIC OR LATINO	unknown	No	NA	NA	unknown	G3	unknown	1-10 mm	unknown	Bilateral	Tumor resection	unknown	unknown	unknown	unknown	unknown	unknown	NO	YES	NO	YES	TCGA-OV	NA	3	Stage IIIC	NA	NA	NA	NA
347	Ovary	Serous Cystadenocarcinoma	FEMALE	Dead	1024	WHITE	61	YES	C56.9	8441-03-01	C56.9	unknown	unknown	1	2004	WITH TUMOR	2	6	2009	NOT HISPANIC OR LATINO	unknown	No	NA	NA	unknown	G3	unknown	>20 mm	unknown	Bilateral	Tumor resection	unknown	NO	unknown	unknown	unknown	unknown	YES	YES	YES	YES	TCGA-OV	NA	3	Stage IIIB	NA	NA	NA	NA
316	Ovary	Serous Cystadenocarcinoma	FEMALE	Alive	655	WHITE	36	YES	C56.9	8441-03-01	C56.9	unknown	unknown	0	2007	WITH TUMOR	2	6	2009	unknown	unknown	No	NA	0	Preoperative	G3	unknown	>20 mm	unknown	Bilateral	Tumor resection	unknown	YES	YES	unknown	unknown	unknown	YES	YES	NO	YES	TCGA-OV	NA	3	Stage IIIC	NA	NA	NA	NA
351	Ovary	Serous Cystadenocarcinoma	FEMALE	Alive	1293	WHITE	61	YES	C56.9	8441-03-01	C56.9	unknown	unknown	0	2005	WITH TUMOR	1	10	2009	NOT HISPANIC OR LATINO	unknown	No	NA	NA	unknown	G3	unknown	unknown	unknown	Left	Tumor resection	unknown	YES	YES	unknown	unknown	unknown	YES	YES	NO	YES	TCGA-OV	NA	2	Stage IIA	NA	NA	NA	NA
291	Ovary	Serous Cystadenocarcinoma	FEMALE	Dead	1104	WHITE	29	YES	C56.9	8441-03-01	C56.9	unknown	unknown	0	2006	unknown	2	6	2009	unknown	unknown	No	NA	0	Post-Adjuvant Therapy	G3	unknown	>20 mm	unknown	Right	Tumor resection	unknown	unknown	YES	unknown	unknown	unknown	YES	YES	NO	YES	TCGA-OV	NA	3	Stage IIIC	NA	NA	NA	NA
185	Ovary	Serous Cystadenocarcinoma	FEMALE	Dead	1341	WHITE	24	YES	C56.9	8441-03-01	C56.9	unknown	unknown	0	1999	WITH TUMOR	2	6	2009	unknown	unknown	No	NA	NA	unknown	G4	unknown	1-10 mm	unknown	Left	Tumor resection	unknown	unknown	unknown	unknown	unknown	unknown	YES	YES	NO	YES	TCGA-OV	NA	3	Stage IIIC	NA	NA	NA	NA
12	Ovary	Serous Cystadenocarcinoma	FEMALE	Dead	1024	WHITE	4	YES	C56.9	8441-03-01	C56.9	unknown	unknown	1	2003	WITH TUMOR	26	3	2009	NOT HISPANIC OR LATINO	unknown	No	NA	1	Preoperative	G3	unknown	1-10 mm	unknown	Bilateral	Tumor resection	unknown	unknown	NO	unknown	unknown	unknown	YES	YES	NO	YES	TCGA-OV	NA	3	Stage IIIC	NA	NA	NA	NA
290	Ovary	Serous Cystadenocarcinoma	FEMALE	Alive	163	WHITE	29	YES	C56.9	8441-03-01	C56.9	unknown	unknown	0	2009	TUMOR FREE	2	6	2009	unknown	unknown	No	NA	0	Post-Adjuvant Therapy	G3	unknown	No Macroscopic disease	unknown	Right	Tumor resection	unknown	unknown	YES	unknown	unknown	unknown	NO	YES	NO	YES	TCGA-OV	NA	3	Stage IIIC	NA	NA	NA	NA
323	Ovary	Serous Cystadenocarcinoma	FEMALE	Dead	731	WHITE	57	YES	C56.9	8441-03-01	C56.9	unknown	unknown	0	2006	WITH TUMOR	2	6	2009	unknown	unknown	No	NA	NA	unknown	G3	unknown	1-10 mm	unknown	Left	Tumor resection	unknown	YES	YES	unknown	unknown	unknown	NO	YES	NO	YES	TCGA-OV	NA	3	Stage IIIC	NA	NA	NA	NA
178	Ovary	Serous Cystadenocarcinoma	FEMALE	Dead	1721	WHITE	24	YES	C56.9	8441-03-01	C56.9	unknown	unknown	0	1997	WITH TUMOR	12	5	2009	unknown	unknown	No	NA	NA	unknown	G3	unknown	unknown	unknown	Bilateral	Tumor resection	unknown	unknown	unknown	unknown	unknown	unknown	YES	YES	NO	YES	TCGA-OV	NA	3	Stage IIIB	NA	NA	NA	NA
201	Ovary	Serous Cystadenocarcinoma	FEMALE	Dead	919	WHITE	24	YES	C56.9	8441-03-01	C56.9	unknown	unknown	1	2001	WITH TUMOR	26	2	2010	unknown	unknown	No	NA	NA	unknown	G3	unknown	1-10 mm	unknown	Bilateral	Tumor resection	unknown	unknown	YES	unknown	unknown	unknown	YES	YES	NO	YES	TCGA-OV	NA	3	Stage IIIC	NA	NA	NA	NA
130	Ovary	Serous Cystadenocarcinoma	FEMALE	Dead	9	WHITE	23	YES	C56.9	8441-03-01	C56.9	unknown	unknown	0	1999	WITH TUMOR	19	2	2009	NOT HISPANIC OR LATINO	unknown	No	NA	NA	unknown	G3	unknown	>20 mm	unknown	Left	Tumor resection	unknown	unknown	unknown	unknown	unknown	unknown	NO	NO	NO	YES	TCGA-OV	NA	4	Stage IV	NA	NA	NA	NA
262	Ovary	Serous Cystadenocarcinoma	FEMALE	Dead	821	WHITE	25	YES	C56.9	8441-03-01	C56.9	unknown	unknown	1	2005	WITH TUMOR	5	1	2010	NOT HISPANIC OR LATINO	unknown	No	NA	NA	unknown	G3	unknown	1-10 mm	unknown	Bilateral	Tumor resection	unknown	unknown	unknown	unknown	unknown	unknown	YES	YES	NO	YES	TCGA-OV	NA	4	Stage IV	NA	NA	NA	NA
70	Ovary	Serous Cystadenocarcinoma	FEMALE	Alive	2141	WHITE	13	YES	C56.9	8441-03-01	C56.9	unknown	unknown	1	2003	TUMOR FREE	25	2	2009	NOT HISPANIC OR LATINO	unknown	No	80	NA	Pre-Adjuvant Therapy	G3	unknown	No Macroscopic disease	unknown	Right	Tumor resection	unknown	unknown	unknown	unknown	unknown	unknown	NO	YES	NO	YES	TCGA-OV	NA	3	Stage IIIC	NA	NA	NA	NA
171	Ovary	Serous Cystadenocarcinoma	FEMALE	Dead	3224	WHITE	24	YES	C56.9	8441-03-01	C56.9	unknown	unknown	0	1998	WITH TUMOR	16	4	2009	unknown	unknown	No	NA	NA	unknown	G3	unknown	1-10 mm	unknown	Right	Tumor resection	unknown	unknown	YES	unknown	unknown	unknown	YES	YES	NO	YES	TCGA-OV	NA	3	Stage IIIC	NA	NA	NA	NA
221	Ovary	Serous Cystadenocarcinoma	FEMALE	Dead	2049	WHITE	24	YES	C56.9	8441-03-01	C56.9	unknown	unknown	1	1997	WITH TUMOR	16	3	2010	unknown	unknown	No	NA	NA	unknown	G3	unknown	>20 mm	unknown	Bilateral	Cytology (e.g. Peritoneal or pleural fluid)	unknown	unknown	unknown	unknown	unknown	unknown	YES	YES	NO	YES	TCGA-OV	NA	4	Stage IV	NA	NA	NA	NA
296	Omentum	Serous Cystadenocarcinoma	FEMALE	Dead	1088	BLACK OR AFRICAN AMERICAN	29	YES	C48.1	8460-03-01	C48.1	unknown	unknown	1	2011	WITH TUMOR	20	8	2013	unknown	No	No	NA	NA	unknown	G3	unknown	unknown	unknown	unknown	unknown	unknown	unknown	unknown	NO	YES	Complete Remission/Response	YES	YES	NO	YES	TCGA-OV	NA	3	Stage IIIC	NA	NA	NA	NA
73	Ovary	Serous Cystadenocarcinoma	FEMALE	Alive	1748	WHITE	13	YES	C56.9	8441-03-01	C56.9	unknown	unknown	0	2004	WITH TUMOR	25	2	2009	NOT HISPANIC OR LATINO	unknown	No	80	NA	Pre-Adjuvant Therapy	G3	unknown	1-10 mm	ASHKENAZI	Right	Cytology (e.g. Peritoneal or pleural fluid)	unknown	unknown	unknown	unknown	unknown	unknown	YES	YES	NO	YES	TCGA-OV	NA	3	Stage IIIC	NA	NA	NA	NA
175	Ovary	Serous Cystadenocarcinoma	FEMALE	Dead	676	BLACK OR AFRICAN AMERICAN	24	YES	C56.9	8441-03-01	C56.9	unknown	unknown	0	2000	WITH TUMOR	13	5	2009	unknown	unknown	No	NA	NA	unknown	G3	unknown	1-10 mm	unknown	Left	Tumor resection	unknown	unknown	unknown	unknown	unknown	unknown	YES	YES	NO	YES	TCGA-OV	NA	3	Stage IIIC	NA	NA	NA	NA
250	Ovary	Serous Cystadenocarcinoma	FEMALE	Dead	455	WHITE	25	YES	C56.9	8441-03-01	C56.9	unknown	unknown	0	1994	WITH TUMOR	2	6	2009	NOT HISPANIC OR LATINO	unknown	No	NA	NA	unknown	G3	unknown	11-20 mm	unknown	Bilateral	Tumor resection	unknown	unknown	unknown	unknown	unknown	unknown	YES	YES	NO	YES	TCGA-OV	NA	3	Stage IIIC	NA	NA	NA	NA
256	Ovary	Serous Cystadenocarcinoma	FEMALE	Dead	92	WHITE	25	YES	C56.9	8441-03-01	C56.9	unknown	unknown	1	2004	unknown	5	1	2010	NOT HISPANIC OR LATINO	unknown	No	NA	NA	unknown	G3	unknown	No Macroscopic disease	unknown	Bilateral	Tumor resection	unknown	unknown	unknown	unknown	unknown	unknown	NO	NO	NO	YES	TCGA-OV	NA	3	Stage IIIC	NA	NA	NA	NA
1	Ovary	Serous Cystadenocarcinoma	FEMALE	Dead	1336	WHITE	4	YES	C56.9	8441-03-01	C56.9	unknown	unknown	1	2004	WITH TUMOR	26	3	2009	NOT HISPANIC OR LATINO	unknown	No	NA	NA	unknown	G3	unknown	1-10 mm	unknown	Bilateral	Tumor resection	unknown	NO	YES	unknown	unknown	unknown	YES	YES	NO	YES	TCGA-OV	NA	3	Stage IIIC	NA	NA	NA	NA
140	Ovary	Serous Cystadenocarcinoma	FEMALE	Dead	1189	WHITE	23	YES	C56.9	8441-03-01	C56.9	unknown	unknown	0	1998	WITH TUMOR	19	2	2009	unknown	unknown	No	NA	NA	unknown	G3	unknown	1-10 mm	unknown	Left	Tumor resection	unknown	unknown	NO	unknown	unknown	unknown	YES	YES	YES	YES	TCGA-OV	NA	3	Stage IIIC	NA	NA	NA	NA
367	Ovary	Serous Cystadenocarcinoma	FEMALE	Dead	1688	WHITE	61	YES	C56.9	8441-03-01	C56.9	unknown	unknown	0	1999	WITH TUMOR	7	12	2009	NOT HISPANIC OR LATINO	unknown	No	100	0	Post-Adjuvant Therapy	G2	unknown	11-20 mm	unknown	Bilateral	Tumor resection	unknown	unknown	unknown	unknown	unknown	unknown	NO	YES	YES	YES	TCGA-OV	NA	3	Stage IIIC	NA	NA	NA	NA
121	Ovary	Serous Cystadenocarcinoma	FEMALE	Dead	1446	WHITE	23	YES	C56.9	8441-03-01	C56.9	unknown	unknown	0	2004	WITH TUMOR	24	2	2009	NOT HISPANIC OR LATINO	unknown	No	NA	NA	unknown	G3	unknown	>20 mm	unknown	Right	Tumor resection	unknown	YES	YES	unknown	unknown	unknown	YES	YES	NO	YES	TCGA-OV	NA	4	Stage IV	NA	NA	NA	NA
183	Ovary	Serous Cystadenocarcinoma	FEMALE	Dead	1213	WHITE	24	YES	C56.9	8441-03-01	C56.9	unknown	unknown	0	2000	WITH TUMOR	2	6	2009	unknown	unknown	No	NA	NA	unknown	G3	unknown	>20 mm	unknown	Bilateral	Tumor resection	unknown	unknown	unknown	unknown	unknown	unknown	YES	YES	NO	YES	TCGA-OV	NA	3	Stage IIIC	NA	NA	NA	NA
352	Ovary	Serous Cystadenocarcinoma	FEMALE	Alive	1722	unknown	61	YES	C56.9	8441-03-01	C56.9	unknown	unknown	1	2003	WITH TUMOR	1	10	2009	unknown	unknown	No	NA	NA	unknown	G3	unknown	>20 mm	unknown	Bilateral	Tumor resection	unknown	YES	YES	unknown	unknown	unknown	YES	YES	NO	YES	TCGA-OV	NA	3	Stage IIIC	NA	NA	NA	NA
57	Ovary	Serous Cystadenocarcinoma	FEMALE	Alive	981	WHITE	13	YES	C56.9	8441-03-01	C56.9	unknown	unknown	1	2006	TUMOR FREE	24	2	2009	NOT HISPANIC OR LATINO	unknown	No	80	NA	Pre-Adjuvant Therapy	G3	unknown	No Macroscopic disease	ASHKENAZI	Bilateral	Tumor resection	unknown	unknown	unknown	unknown	unknown	unknown	YES	YES	NO	YES	TCGA-OV	NA	3	Stage IIIC	NA	NA	NA	NA
69	Ovary	Serous Cystadenocarcinoma	FEMALE	Dead	2028	WHITE	13	YES	C56.9	8441-03-01	C56.9	unknown	unknown	0	2002	WITH TUMOR	25	2	2009	NOT HISPANIC OR LATINO	unknown	No	80	NA	Pre-Adjuvant Therapy	G3	unknown	1-10 mm	ASHKENAZI	Bilateral	Tumor resection	unknown	unknown	unknown	unknown	unknown	unknown	YES	YES	NO	YES	TCGA-OV	NA	3	Stage IIIC	NA	NA	NA	NA
91	Ovary	Serous Cystadenocarcinoma	FEMALE	Alive	143	WHITE	13	YES	C56.9	8441-03-01	C56.9	unknown	unknown	0	2008	TUMOR FREE	20	3	2009	NOT HISPANIC OR LATINO	unknown	No	60	NA	Pre-Adjuvant Therapy	GX	unknown	unknown	unknown	Bilateral	Tumor resection	unknown	unknown	unknown	unknown	unknown	unknown	YES	YES	NO	YES	TCGA-OV	NA	4	Stage IV	NA	NA	NA	NA
236	Ovary	Serous Cystadenocarcinoma	FEMALE	Dead	395	WHITE	25	YES	C56.9	8441-03-01	C56.9	unknown	unknown	1	2001	WITH TUMOR	27	3	2009	NOT HISPANIC OR LATINO	unknown	No	NA	NA	unknown	G3	unknown	1-10 mm	unknown	Bilateral	Tumor resection	unknown	unknown	unknown	unknown	unknown	unknown	YES	YES	NO	YES	TCGA-OV	NA	3	Stage IIIC	NA	NA	NA	NA
204	Ovary	Serous Cystadenocarcinoma	FEMALE	Dead	4624	WHITE	24	YES	C56.9	8441-03-01	C56.9	unknown	unknown	1	1994	WITH TUMOR	1	3	2010	unknown	unknown	No	NA	NA	unknown	G3	unknown	1-10 mm	unknown	Bilateral	Tumor resection	unknown	unknown	unknown	unknown	unknown	unknown	YES	YES	NO	YES	TCGA-OV	NA	3	Stage IIIC	NA	NA	NA	NA
349	Ovary	Serous Cystadenocarcinoma	FEMALE	Alive	952	WHITE	61	YES	C56.9	8441-03-01	C56.9	unknown	unknown	1	2006	WITH TUMOR	1	10	2009	NOT HISPANIC OR LATINO	unknown	No	NA	NA	unknown	G3	unknown	11-20 mm	unknown	Bilateral	Tumor resection	unknown	YES	unknown	unknown	unknown	unknown	YES	YES	NO	YES	TCGA-OV	NA	3	Stage IIIC	NA	NA	NA	NA
214	Ovary	Serous Cystadenocarcinoma	FEMALE	Dead	24	WHITE	24	YES	C56.9	8441-03-01	C56.9	unknown	unknown	1	1992	WITH TUMOR	15	3	2010	unknown	unknown	No	NA	NA	unknown	G3	unknown	11-20 mm	unknown	Left	Tumor resection	unknown	unknown	YES	unknown	unknown	unknown	NO	NO	NO	YES	TCGA-OV	NA	3	Stage IIIC	NA	NA	NA	NA
156	Ovary	Serous Cystadenocarcinoma	FEMALE	Alive	238	WHITE	24	YES	C56.9	8441-03-01	C56.9	unknown	unknown	0	2008	TUMOR FREE	1	4	2009	unknown	unknown	No	NA	NA	unknown	G3	unknown	1-10 mm	unknown	Left	Tumor resection	unknown	unknown	unknown	unknown	unknown	unknown	NO	YES	NO	YES	TCGA-OV	NA	4	Stage IV	NA	NA	NA	NA
232	Ovary	Serous Cystadenocarcinoma	FEMALE	Dead	1977	WHITE	25	YES	C56.9	8441-03-01	C56.9	unknown	unknown	1	2000	unknown	27	3	2009	NOT HISPANIC OR LATINO	unknown	No	NA	NA	unknown	G3	unknown	11-20 mm	unknown	Bilateral	Tumor resection	unknown	unknown	unknown	unknown	unknown	unknown	YES	YES	NO	YES	TCGA-OV	NA	3	Stage IIIC	NA	NA	NA	NA
153	Ovary	Serous Cystadenocarcinoma	FEMALE	Dead	1442	WHITE	24	YES	C56.9	8441-03-01	C56.9	unknown	unknown	0	2001	WITH TUMOR	9	3	2009	unknown	unknown	No	NA	NA	unknown	G3	unknown	1-10 mm	unknown	Bilateral	Cytology (e.g. Peritoneal or pleural fluid)	unknown	unknown	unknown	unknown	unknown	unknown	YES	YES	YES	YES	TCGA-OV	NA	3	Stage IIIC	NA	NA	NA	NA
365	Ovary	Serous Cystadenocarcinoma	FEMALE	Alive	1844	WHITE	61	YES	C56.9	8441-03-01	C56.9	unknown	unknown	1	2003	TUMOR FREE	7	12	2009	unknown	unknown	No	NA	NA	unknown	G2	unknown	1-10 mm	unknown	Bilateral	Tumor resection	unknown	YES	YES	unknown	unknown	unknown	NO	YES	NO	YES	TCGA-OV	NA	2	Stage IIC	NA	NA	NA	NA
148	Ovary	Serous Cystadenocarcinoma	FEMALE	Dead	354	WHITE	24	YES	C56.9	8441-03-01	C56.9	unknown	unknown	1	2005	WITH TUMOR	9	3	2009	unknown	unknown	No	NA	NA	unknown	G3	unknown	>20 mm	unknown	Bilateral	Fine needle aspiration biopsy	unknown	unknown	YES	unknown	unknown	unknown	YES	YES	NO	YES	TCGA-OV	NA	3	Stage IIIC	NA	NA	NA	NA
137	Ovary	Serous Cystadenocarcinoma	FEMALE	Alive	2616	WHITE	23	YES	C56.9	8441-03-01	C56.9	unknown	unknown	0	2001	TUMOR FREE	20	2	2009	NOT HISPANIC OR LATINO	unknown	No	NA	NA	unknown	G3	unknown	>20 mm	unknown	Left	Tumor resection	unknown	YES	YES	unknown	unknown	unknown	NO	YES	NO	YES	TCGA-OV	NA	3	Stage IIIC	NA	NA	NA	NA
228	Ovary	Serous Cystadenocarcinoma	FEMALE	Dead	1583	WHITE	25	YES	C56.9	8441-03-01	C56.9	unknown	unknown	0	2000	WITH TUMOR	27	3	2009	NOT HISPANIC OR LATINO	unknown	No	NA	NA	unknown	G3	unknown	1-10 mm	unknown	Bilateral	Tumor resection	unknown	unknown	unknown	unknown	unknown	unknown	YES	YES	NO	YES	TCGA-OV	NA	3	Stage IIIC	NA	NA	NA	NA
34	Ovary	Serous Cystadenocarcinoma	FEMALE	Alive	547	WHITE	9	YES	C56.9	8441-03-01	C56.9	unknown	unknown	0	2005	WITH TUMOR	2	6	2009	unknown	unknown	No	NA	NA	unknown	G3	unknown	No Macroscopic disease	unknown	Bilateral	Tumor resection	unknown	NO	NO	unknown	unknown	unknown	YES	YES	NO	YES	TCGA-OV	NA	3	Stage IIIA	NA	NA	NA	NA
110	Ovary	Serous Cystadenocarcinoma	FEMALE	Alive	78	WHITE	13	YES	C56.9	8441-03-01	C56.9	unknown	unknown	1	2008	TUMOR FREE	31	3	2009	NOT HISPANIC OR LATINO	unknown	No	NA	NA	unknown	G3	unknown	No Macroscopic disease	unknown	Left	Tumor resection	unknown	unknown	unknown	unknown	unknown	unknown	YES	YES	NO	YES	TCGA-OV	NA	3	Stage IIIC	NA	NA	NA	NA
331	Ovary	Serous Cystadenocarcinoma	FEMALE	Dead	679	unknown	59	YES	C56.9	8441-03-01	C56.9	NO	YES	0	1995	WITH TUMOR	29	1	2010	unknown	unknown	No	NA	NA	unknown	G3	unknown	1-10 mm	unknown	Bilateral	Tumor resection	unknown	unknown	unknown	unknown	unknown	unknown	YES	NO	NO	YES	TCGA-OV	NA	4	Stage IV	NA	NA	NA	NA
194	Ovary	Serous Cystadenocarcinoma	FEMALE	Alive	106	WHITE	24	YES	C56.9	8441-03-01	C56.9	unknown	unknown	1	2009	unknown	2	6	2009	unknown	unknown	No	NA	NA	unknown	G3	unknown	1-10 mm	unknown	Right	Tumor resection	unknown	unknown	YES	unknown	unknown	unknown	NO	YES	NO	YES	TCGA-OV	NA	3	Stage IIIC	NA	NA	NA	NA
14	Ovary	Serous Cystadenocarcinoma	FEMALE	Dead	1720	WHITE	4	YES	C56.9	8441-03-01	C56.9	unknown	unknown	0	2004	TUMOR FREE	2	6	2009	NOT HISPANIC OR LATINO	unknown	No	NA	1	Preoperative	G2	unknown	No Macroscopic disease	unknown	Bilateral	Tumor resection	unknown	unknown	NO	unknown	unknown	unknown	YES	YES	NO	YES	TCGA-OV	NA	3	Stage IIIA	NA	NA	NA	NA
245	Ovary	Serous Cystadenocarcinoma	FEMALE	Dead	9	WHITE	25	YES	C56.9	8441-03-01	C56.9	unknown	unknown	1	2002	TUMOR FREE	2	6	2009	NOT HISPANIC OR LATINO	unknown	No	NA	NA	unknown	G3	unknown	1-10 mm	unknown	Bilateral	Tumor resection	unknown	unknown	unknown	unknown	unknown	unknown	NO	NO	NO	YES	TCGA-OV	NA	3	Stage IIIC	NA	NA	NA	NA
258	Ovary	Serous Cystadenocarcinoma	FEMALE	Dead	608	WHITE	25	YES	C56.9	8441-03-01	C56.9	unknown	unknown	1	2004	WITH TUMOR	5	1	2010	NOT HISPANIC OR LATINO	unknown	No	NA	NA	unknown	G3	unknown	>20 mm	unknown	Bilateral	Tumor resection	unknown	unknown	unknown	unknown	unknown	unknown	YES	YES	NO	YES	TCGA-OV	NA	3	Stage IIIC	NA	NA	NA	NA
342	Ovary	Serous Cystadenocarcinoma	FEMALE	Alive	848	WHITE	61	YES	C56.9	8441-03-01	C56.9	unknown	unknown	0	2007	TUMOR FREE	2	6	2009	NOT HISPANIC OR LATINO	unknown	No	NA	NA	unknown	G3	unknown	1-10 mm	unknown	Bilateral	Tumor resection	unknown	NO	NO	unknown	unknown	unknown	YES	YES	NO	YES	TCGA-OV	NA	4	Stage IV	NA	NA	NA	NA
138	Ovary	Serous Cystadenocarcinoma	FEMALE	Alive	3953	WHITE	23	YES	C56.9	8441-03-01	C56.9	unknown	unknown	1	1997	TUMOR FREE	27	3	2009	NOT HISPANIC OR LATINO	unknown	No	NA	NA	unknown	G3	unknown	1-10 mm	unknown	Left	Tumor resection	unknown	YES	YES	unknown	unknown	unknown	YES	YES	NO	YES	TCGA-OV	NA	3	Stage IIIC	NA	NA	NA	NA
198	Ovary	Serous Cystadenocarcinoma	FEMALE	Alive	343	WHITE	24	YES	C56.9	8441-03-01	C56.9	unknown	unknown	0	2009	TUMOR FREE	2	6	2009	unknown	unknown	No	NA	NA	unknown	G3	unknown	1-10 mm	unknown	Bilateral	Excisional Biopsy	unknown	unknown	YES	unknown	unknown	unknown	NO	YES	NO	YES	TCGA-OV	NA	4	Stage IV	NA	NA	NA	NA
276	Ovary	Serous Cystadenocarcinoma	FEMALE	Alive	1053	BLACK OR AFRICAN AMERICAN	29	YES	C56.9	8441-03-01	C56.9	unknown	unknown	0	2006	TUMOR FREE	2	6	2009	unknown	unknown	No	NA	0	Post-Adjuvant Therapy	G2	unknown	No Macroscopic disease	unknown	Bilateral	Tumor resection	unknown	unknown	unknown	unknown	unknown	unknown	NO	YES	NO	YES	TCGA-OV	NA	3	Stage IIIC	NA	NA	NA	NA
101	Ovary	Serous Cystadenocarcinoma	FEMALE	Dead	129	WHITE	13	YES	C56.9	8441-03-01	C56.9	unknown	unknown	1	2004	unknown	31	3	2009	NOT HISPANIC OR LATINO	unknown	No	NA	NA	unknown	G3	unknown	>20 mm	unknown	Bilateral	Cytology (e.g. Peritoneal or pleural fluid)	unknown	unknown	unknown	unknown	unknown	unknown	NO	YES	NO	YES	TCGA-OV	NA	3	Stage IIIC	NA	NA	NA	NA
249	Ovary	Serous Cystadenocarcinoma	FEMALE	Dead	1583	WHITE	25	YES	C56.9	8441-03-01	C56.9	unknown	unknown	1	2002	WITH TUMOR	2	6	2009	NOT HISPANIC OR LATINO	unknown	No	NA	NA	unknown	G3	unknown	1-10 mm	unknown	Bilateral	Tumor resection	unknown	unknown	unknown	unknown	unknown	unknown	YES	YES	NO	YES	TCGA-OV	NA	3	Stage IIIC	NA	NA	NA	NA
64	Ovary	Serous Cystadenocarcinoma	FEMALE	Dead	1073	WHITE	13	YES	C56.9	8441-03-01	C56.9	unknown	unknown	1	2003	WITH TUMOR	25	2	2009	NOT HISPANIC OR LATINO	unknown	No	NA	NA	unknown	G3	unknown	1-10 mm	unknown	Bilateral	Cytology (e.g. Peritoneal or pleural fluid)	unknown	unknown	unknown	unknown	unknown	unknown	YES	YES	NO	YES	TCGA-OV	NA	3	Stage IIIC	NA	NA	NA	NA
51	Ovary	Serous Cystadenocarcinoma	FEMALE	Dead	1355	WHITE	13	YES	C56.9	8441-03-01	C56.9	unknown	unknown	0	2001	WITH TUMOR	24	2	2009	NOT HISPANIC OR LATINO	unknown	No	80	NA	Pre-Adjuvant Therapy	G3	unknown	1-10 mm	unknown	Bilateral	Tumor resection	unknown	unknown	unknown	unknown	unknown	unknown	YES	YES	NO	YES	TCGA-OV	NA	3	Stage IIIC	NA	NA	NA	NA
29	Ovary	Serous Cystadenocarcinoma	FEMALE	Dead	1266	WHITE	9	YES	C56.9	8441-03-01	C56.9	unknown	unknown	1	2002	WITH TUMOR	2	6	2009	NOT HISPANIC OR LATINO	unknown	No	NA	NA	unknown	G2	unknown	No Macroscopic disease	unknown	Left	Tumor resection	unknown	YES	YES	unknown	unknown	unknown	YES	YES	YES	YES	TCGA-OV	NA	3	Stage IIIC	NA	NA	NA	NA
160	Ovary	Serous Cystadenocarcinoma	FEMALE	Alive	190	WHITE	24	YES	C56.9	8441-03-01	C56.9	unknown	unknown	1	2008	TUMOR FREE	16	4	2009	unknown	unknown	No	NA	NA	unknown	G3	unknown	1-10 mm	unknown	Bilateral	Tumor resection	unknown	unknown	YES	unknown	unknown	unknown	NO	YES	NO	YES	TCGA-OV	NA	3	Stage IIIC	NA	NA	NA	NA
85	Ovary	Serous Cystadenocarcinoma	FEMALE	Alive	331	WHITE	13	YES	C56.9	8441-03-01	C56.9	unknown	unknown	0	2008	TUMOR FREE	20	3	2009	NOT HISPANIC OR LATINO	unknown	No	NA	NA	unknown	G3	unknown	unknown	unknown	Left	Cytology (e.g. Peritoneal or pleural fluid)	unknown	unknown	unknown	unknown	unknown	unknown	YES	YES	NO	YES	TCGA-OV	NA	3	Stage IIIC	NA	NA	NA	NA
82	Ovary	Serous Cystadenocarcinoma	FEMALE	Alive	420	WHITE	13	YES	C56.9	8441-03-01	C56.9	unknown	unknown	1	2007	WITH TUMOR	25	2	2009	NOT HISPANIC OR LATINO	unknown	No	NA	NA	unknown	G3	unknown	1-10 mm	unknown	Bilateral	Tumor resection	unknown	unknown	unknown	unknown	unknown	unknown	YES	YES	NO	YES	TCGA-OV	NA	3	Stage IIIC	NA	NA	NA	NA
139	Ovary	Serous Cystadenocarcinoma	FEMALE	Alive	130	WHITE	23	YES	C56.9	8441-03-01	C56.9	unknown	unknown	1	2008	unknown	24	2	2009	NOT HISPANIC OR LATINO	unknown	No	NA	NA	unknown	G3	unknown	1-10 mm	unknown	Right	Tumor resection	unknown	NO	NO	unknown	unknown	unknown	NO	YES	NO	YES	TCGA-OV	NA	3	Stage IIIC	NA	NA	NA	NA
208	Ovary	Serous Cystadenocarcinoma	FEMALE	Dead	3337	WHITE	24	YES	C56.9	8441-03-01	C56.9	unknown	unknown	0	1995	WITH TUMOR	15	3	2010	unknown	unknown	No	NA	0	Other	G3	unknown	>20 mm	unknown	Bilateral	Tumor resection	unknown	unknown	unknown	unknown	unknown	unknown	YES	YES	NO	YES	TCGA-OV	NA	4	Stage IV	NA	NA	NA	NA
80	Ovary	Serous Cystadenocarcinoma	FEMALE	Alive	912	WHITE	13	YES	C56.9	8441-03-01	C56.9	unknown	unknown	0	2006	WITH TUMOR	25	2	2009	NOT HISPANIC OR LATINO	unknown	No	80	NA	Pre-Adjuvant Therapy	G3	unknown	No Macroscopic disease	unknown	Bilateral	Tumor resection	unknown	unknown	unknown	unknown	unknown	unknown	YES	YES	NO	YES	TCGA-OV	NA	3	Stage IIIC	NA	NA	NA	NA
253	Ovary	Serous Cystadenocarcinoma	FEMALE	Dead	1492	WHITE	25	YES	C56.9	8441-03-01	C56.9	unknown	unknown	0	2003	TUMOR FREE	5	1	2010	NOT HISPANIC OR LATINO	unknown	No	NA	NA	unknown	G3	unknown	>20 mm	unknown	Bilateral	Tumor resection	unknown	unknown	unknown	unknown	unknown	unknown	NO	YES	NO	YES	TCGA-OV	NA	3	Stage IIIC	NA	NA	NA	NA
303	Ovary	Serous Cystadenocarcinoma	FEMALE	Dead	186	WHITE	30	YES	C56.9	8441-03-01	C56.9	unknown	unknown	1	2003	WITH TUMOR	2	6	2009	NOT HISPANIC OR LATINO	unknown	No	NA	NA	unknown	G2	unknown	>20 mm	unknown	unknown	Tumor resection	unknown	unknown	NO	unknown	unknown	unknown	NO	NO	NO	YES	TCGA-OV	NA	4	Stage IV	NA	NA	NA	NA
133	Ovary	Serous Cystadenocarcinoma	FEMALE	Alive	98	WHITE	23	YES	C56.9	8441-03-01	C56.9	unknown	unknown	1	2008	unknown	2	6	2009	unknown	unknown	No	NA	NA	unknown	G3	unknown	>20 mm	unknown	Right	Tumor resection	unknown	unknown	YES	unknown	unknown	unknown	NO	YES	NO	YES	TCGA-OV	NA	3	Stage IIIC	NA	NA	NA	NA
26	Ovary	Serous Cystadenocarcinoma	FEMALE	Dead	304	WHITE	9	YES	C56.9	8441-03-01	C56.9	unknown	unknown	0	1997	WITH TUMOR	2	6	2009	NOT HISPANIC OR LATINO	unknown	No	NA	NA	unknown	G3	unknown	>20 mm	unknown	Bilateral	Tumor resection	unknown	NO	YES	unknown	unknown	unknown	NO	YES	NO	YES	TCGA-OV	NA	3	Stage IIIC	NA	NA	NA	NA
97	Ovary	Serous Cystadenocarcinoma	FEMALE	Dead	2154	WHITE	13	YES	C56.9	8441-03-01	C56.9	unknown	unknown	0	2002	WITH TUMOR	31	3	2009	NOT HISPANIC OR LATINO	unknown	No	80	NA	Pre-Adjuvant Therapy	G3	unknown	11-20 mm	unknown	Bilateral	Cytology (e.g. Peritoneal or pleural fluid)	unknown	unknown	unknown	unknown	unknown	unknown	YES	YES	NO	YES	TCGA-OV	NA	4	Stage IV	NA	NA	NA	NA
48	Ovary	Serous Cystadenocarcinoma	FEMALE	Dead	608	WHITE	10	YES	C56.9	8441-03-01	C56.9	unknown	unknown	0	2005	WITH TUMOR	6	3	2009	unknown	unknown	No	NA	0	Preoperative	G3	unknown	1-10 mm	unknown	Bilateral	Tumor resection	unknown	unknown	unknown	unknown	unknown	unknown	YES	YES	NO	YES	TCGA-OV	NA	3	Stage IIIC	NA	NA	NA	NA
118	Ovary	Serous Cystadenocarcinoma	FEMALE	Alive	772	WHITE	20	YES	C56.9	8441-03-01	C56.9	unknown	unknown	1	2007	TUMOR FREE	2	6	2009	NOT HISPANIC OR LATINO	unknown	No	NA	0	Post-Adjuvant Therapy	G3	unknown	No Macroscopic disease	unknown	Right	Tumor resection	unknown	unknown	unknown	unknown	unknown	unknown	YES	YES	NO	YES	TCGA-OV	NA	3	Stage IIIC	NA	NA	NA	NA
112	Ovary	Serous Cystadenocarcinoma	FEMALE	Alive	94	WHITE	13	YES	C56.9	8441-03-01	C56.9	unknown	unknown	0	2008	unknown	31	3	2009	NOT HISPANIC OR LATINO	unknown	No	60	NA	Pre-Adjuvant Therapy	G3	unknown	No Macroscopic disease	unknown	Bilateral	Fine needle aspiration biopsy	unknown	unknown	unknown	unknown	unknown	unknown	YES	YES	NO	YES	TCGA-OV	NA	3	Stage IIIC	NA	NA	NA	NA
84	Ovary	Serous Cystadenocarcinoma	FEMALE	Alive	185	WHITE	13	YES	C56.9	8441-03-01	C56.9	unknown	unknown	0	2008	TUMOR FREE	25	2	2009	NOT HISPANIC OR LATINO	unknown	No	NA	NA	unknown	G3	unknown	1-10 mm	ASHKENAZI	Bilateral	Cytology (e.g. Peritoneal or pleural fluid)	unknown	unknown	unknown	unknown	unknown	unknown	YES	YES	NO	YES	TCGA-OV	NA	4	Stage IV	NA	NA	NA	NA
145	Ovary	Serous Cystadenocarcinoma	FEMALE	Dead	1516	WHITE	23	YES	C56.9	8441-03-01	C56.9	unknown	unknown	0	2000	WITH TUMOR	18	11	2009	NOT HISPANIC OR LATINO	unknown	No	NA	NA	unknown	G3	unknown	No Macroscopic disease	ASHKENAZI	Right	Tumor resection	unknown	YES	YES	unknown	unknown	unknown	YES	YES	NO	YES	TCGA-OV	NA	4	Stage IV	NA	NA	NA	NA
61	Ovary	Serous Cystadenocarcinoma	FEMALE	Alive	596	WHITE	13	YES	C56.9	8441-03-01	C56.9	unknown	unknown	1	2007	WITH TUMOR	25	2	2009	NOT HISPANIC OR LATINO	unknown	No	80	NA	Pre-Adjuvant Therapy	G3	unknown	>20 mm	unknown	Bilateral	Fine needle aspiration biopsy	unknown	unknown	unknown	unknown	unknown	unknown	YES	YES	NO	YES	TCGA-OV	NA	3	Stage IIIC	NA	NA	NA	NA
353	Ovary	Serous Cystadenocarcinoma	FEMALE	Dead	479	WHITE	61	YES	C56.9	8441-03-01	C56.9	unknown	unknown	0	2002	WITH TUMOR	30	11	2009	NOT HISPANIC OR LATINO	unknown	No	NA	NA	unknown	G3	unknown	No Macroscopic disease	unknown	Bilateral	Tumor resection	unknown	YES	unknown	unknown	unknown	unknown	YES	YES	NO	YES	TCGA-OV	NA	4	Stage IV	NA	NA	NA	NA
206	Ovary	Serous Cystadenocarcinoma	FEMALE	Dead	1769	BLACK OR AFRICAN AMERICAN	24	YES	C56.9	8441-03-01	C56.9	unknown	unknown	1	1994	WITH TUMOR	26	2	2010	unknown	unknown	No	NA	NA	unknown	G3	unknown	1-10 mm	unknown	Bilateral	Tumor resection	unknown	unknown	unknown	unknown	unknown	unknown	YES	YES	NO	YES	TCGA-OV	NA	3	Stage IIIC	NA	NA	NA	NA
41	Ovary	Serous Cystadenocarcinoma	FEMALE	Dead	637	BLACK OR AFRICAN AMERICAN	9	YES	C56.9	8441-03-01	C56.9	unknown	unknown	0	2005	WITH TUMOR	2	11	2009	NOT HISPANIC OR LATINO	unknown	No	NA	NA	unknown	G3	unknown	1-10 mm	unknown	Bilateral	Tumor resection	unknown	YES	YES	unknown	unknown	unknown	NO	YES	NO	YES	TCGA-OV	NA	3	Stage IIIC	NA	NA	NA	NA
191	Ovary	Serous Cystadenocarcinoma	FEMALE	Dead	2688	WHITE	24	YES	C56.9	8441-03-01	C56.9	unknown	unknown	1	1996	WITH TUMOR	13	5	2009	unknown	unknown	No	NA	NA	unknown	G3	unknown	unknown	unknown	Bilateral	Tumor resection	unknown	unknown	unknown	unknown	unknown	unknown	NO	YES	YES	YES	TCGA-OV	NA	3	Stage IIIC	NA	NA	NA	NA
8	Ovary	Serous Cystadenocarcinoma	FEMALE	Dead	1499	WHITE	4	YES	C56.9	8441-03-01	C56.9	unknown	unknown	1	2004	WITH TUMOR	26	3	2009	HISPANIC OR LATINO	unknown	No	80	NA	Preoperative	G3	unknown	unknown	unknown	Bilateral	Tumor resection	unknown	YES	YES	unknown	unknown	unknown	YES	YES	NO	YES	TCGA-OV	NA	2	Stage IIC	NA	NA	NA	NA
50	Ovary	Serous Cystadenocarcinoma	FEMALE	Dead	189	WHITE	13	YES	C56.9	8441-03-01	C56.9	unknown	unknown	0	2000	WITH TUMOR	24	2	2009	NOT HISPANIC OR LATINO	unknown	No	80	NA	Pre-Adjuvant Therapy	G3	unknown	1-10 mm	unknown	Bilateral	Cytology (e.g. Peritoneal or pleural fluid)	unknown	unknown	unknown	unknown	unknown	unknown	YES	YES	NO	YES	TCGA-OV	NA	4	Stage IV	NA	NA	NA	NA
227	Ovary	Serous Cystadenocarcinoma	FEMALE	Dead	820	WHITE	25	YES	C56.9	8441-03-01	C56.9	unknown	unknown	1	2000	WITH TUMOR	27	3	2009	NOT HISPANIC OR LATINO	unknown	No	NA	NA	unknown	G3	unknown	1-10 mm	unknown	Bilateral	Tumor resection	unknown	unknown	unknown	unknown	unknown	unknown	YES	YES	NO	YES	TCGA-OV	NA	4	Stage IV	NA	NA	NA	NA
4	Ovary	Serous Cystadenocarcinoma	FEMALE	Alive	33	WHITE	4	YES	C56.9	8441-03-01	C56.9	NO	YES	1	2006	unknown	26	3	2009	NOT HISPANIC OR LATINO	unknown	No	NA	NA	unknown	G3	unknown	unknown	unknown	unknown	unknown	unknown	unknown	unknown	unknown	unknown	unknown	NO	NO	NO	YES	TCGA-OV	NA	unknown	unknown	NA	NA	NA	NA
37	Ovary	Serous Cystadenocarcinoma	FEMALE	Dead	1069	ASIAN	9	YES	C56.9	8441-03-01	C56.9	unknown	unknown	0	1996	WITH TUMOR	3	11	2009	NOT HISPANIC OR LATINO	unknown	No	NA	NA	unknown	G2	unknown	1-10 mm	unknown	Bilateral	Tumor resection	unknown	YES	YES	unknown	unknown	unknown	YES	YES	NO	YES	TCGA-OV	NA	4	Stage IV	NA	NA	NA	NA
235	Ovary	Serous Cystadenocarcinoma	FEMALE	Dead	91	WHITE	25	YES	C56.9	8441-03-01	C56.9	unknown	unknown	1	2001	WITH TUMOR	27	3	2009	NOT HISPANIC OR LATINO	unknown	No	NA	NA	unknown	G3	unknown	>20 mm	unknown	Bilateral	Tumor resection	unknown	unknown	unknown	unknown	unknown	unknown	NO	YES	NO	YES	TCGA-OV	NA	4	Stage IV	NA	NA	NA	NA
209	Ovary	Serous Cystadenocarcinoma	FEMALE	Dead	562	WHITE	24	YES	C56.9	8441-03-01	C56.9	unknown	unknown	1	1995	WITH TUMOR	15	3	2010	unknown	unknown	No	NA	NA	unknown	G3	R1	>20 mm	unknown	Bilateral	Tumor resection	unknown	unknown	unknown	unknown	unknown	unknown	YES	YES	NO	YES	TCGA-OV	NA	3	Stage IIIC	NA	NA	NA	NA
23	Ovary	Serous Cystadenocarcinoma	FEMALE	Dead	1757	WHITE	9	YES	C48.1	8441-03-01	C48.1	unknown	unknown	0	1999	WITH TUMOR	4	3	2009	unknown	unknown	No	NA	NA	unknown	G3	unknown	1-10 mm	unknown	Bilateral	Tumor resection	unknown	NO	NO	unknown	unknown	unknown	YES	YES	NO	YES	TCGA-OV	NA	3	Stage IIIC	NA	NA	NA	NA
239	Ovary	Serous Cystadenocarcinoma	FEMALE	Dead	457	WHITE	25	YES	C56.9	8441-03-01	C56.9	unknown	unknown	1	2002	unknown	27	3	2009	NOT HISPANIC OR LATINO	unknown	No	NA	NA	unknown	G3	unknown	11-20 mm	unknown	Bilateral	Tumor resection	unknown	unknown	unknown	unknown	unknown	unknown	NO	NO	NO	YES	TCGA-OV	NA	3	Stage IIIC	NA	NA	NA	NA
135	Ovary	Serous Cystadenocarcinoma	FEMALE	Dead	2089	WHITE	23	YES	C56.9	8441-03-01	C56.9	unknown	unknown	0	2000	WITH TUMOR	2	6	2009	NOT HISPANIC OR LATINO	unknown	No	NA	NA	unknown	G3	unknown	No Macroscopic disease	unknown	Left	Tumor resection	unknown	unknown	unknown	unknown	unknown	unknown	YES	YES	NO	YES	TCGA-OV	NA	3	Stage IIIC	NA	NA	NA	NA
242	Ovary	Serous Cystadenocarcinoma	FEMALE	Dead	394	WHITE	25	YES	C56.9	8441-03-01	C56.9	unknown	unknown	1	2003	unknown	2	6	2009	NOT HISPANIC OR LATINO	unknown	No	NA	NA	unknown	G3	unknown	1-10 mm	unknown	Bilateral	Tumor resection	unknown	unknown	unknown	unknown	unknown	unknown	NO	NO	NO	YES	TCGA-OV	NA	3	Stage IIIC	NA	NA	NA	NA
226	Ovary	Serous Cystadenocarcinoma	FEMALE	Dead	31	WHITE	25	YES	C56.9	8441-03-01	C56.9	unknown	unknown	1	2001	unknown	27	3	2009	NOT HISPANIC OR LATINO	unknown	No	NA	NA	unknown	G3	unknown	1-10 mm	unknown	Left	Tumor resection	unknown	unknown	unknown	unknown	unknown	unknown	NO	NO	NO	YES	TCGA-OV	NA	4	Stage IV	NA	NA	NA	NA
173	Ovary	Serous Cystadenocarcinoma	FEMALE	Alive	105	WHITE	24	YES	C56.9	8441-03-01	C56.9	unknown	unknown	0	2009	TUMOR FREE	12	5	2009	unknown	unknown	No	NA	1	Other	G3	unknown	1-10 mm	unknown	Bilateral	Tumor resection	unknown	unknown	unknown	unknown	unknown	unknown	NO	YES	NO	YES	TCGA-OV	NA	3	Stage IIIB	NA	NA	NA	NA
324	Ovary	Serous Cystadenocarcinoma	FEMALE	Dead	346	BLACK OR AFRICAN AMERICAN	57	YES	C56.9	8441-03-01	C56.9	unknown	unknown	0	2006	WITH TUMOR	2	6	2009	unknown	unknown	No	NA	NA	unknown	G3	unknown	No Macroscopic disease	unknown	Left	Tumor resection	unknown	NO	NO	unknown	unknown	unknown	NO	YES	NO	YES	TCGA-OV	NA	3	Stage IIIC	NA	NA	NA	NA
16	Ovary	Serous Cystadenocarcinoma	FEMALE	Dead	3622	WHITE	4	YES	C56.9	8441-03-01	C56.9	unknown	unknown	1	1995	WITH TUMOR	2	6	2009	NOT HISPANIC OR LATINO	unknown	No	NA	NA	unknown	G3	unknown	1-10 mm	unknown	Bilateral	Tumor resection	unknown	NO	NO	unknown	unknown	unknown	YES	YES	NO	YES	TCGA-OV	NA	3	Stage IIIC	NA	NA	NA	NA
56	Ovary	Serous Cystadenocarcinoma	FEMALE	Dead	542	WHITE	13	YES	C56.9	8441-03-01	C56.9	unknown	unknown	1	2003	unknown	24	2	2009	NOT HISPANIC OR LATINO	unknown	No	NA	NA	unknown	G3	unknown	>20 mm	unknown	Bilateral	Fine needle aspiration biopsy	unknown	unknown	unknown	unknown	unknown	unknown	NO	NO	NO	YES	TCGA-OV	NA	3	Stage IIIC	NA	NA	NA	NA
310	Ovary	Serous Cystadenocarcinoma	FEMALE	Alive	684	WHITE	31	YES	C56.9	8441-03-01	C56.9	unknown	unknown	0	2007	WITH TUMOR	4	1	2010	NOT HISPANIC OR LATINO	unknown	No	NA	NA	unknown	G3	unknown	No Macroscopic disease	unknown	Left	Tumor resection	unknown	YES	YES	unknown	unknown	unknown	YES	YES	NO	YES	TCGA-OV	NA	3	Stage IIIC	NA	NA	NA	NA
277	Ovary	Serous Cystadenocarcinoma	FEMALE	Dead	528	ASIAN	29	YES	C56.9	8441-03-01	C56.9	unknown	unknown	1	1998	WITH TUMOR	2	6	2009	unknown	unknown	No	NA	NA	unknown	G3	unknown	>20 mm	unknown	Bilateral	Tumor resection	unknown	unknown	unknown	unknown	unknown	unknown	NO	YES	NO	YES	TCGA-OV	NA	3	Stage IIIC	NA	NA	NA	NA
224	Ovary	Serous Cystadenocarcinoma	FEMALE	Dead	1699	WHITE	24	YES	C56.9	8441-03-01	C56.9	unknown	unknown	0	1993	unknown	26	2	2010	unknown	unknown	No	NA	NA	unknown	G3	unknown	>20 mm	unknown	Bilateral	Tumor resection	unknown	unknown	unknown	unknown	unknown	unknown	NO	YES	NO	YES	TCGA-OV	NA	3	Stage IIIC	NA	NA	NA	NA
268	Ovary	Serous Cystadenocarcinoma	FEMALE	Dead	1229	WHITE	29	YES	C56.9	8441-03-01	C56.9	unknown	unknown	1	2003	unknown	2	6	2009	unknown	unknown	No	NA	NA	unknown	G2	unknown	>20 mm	unknown	Left	Tumor resection	unknown	unknown	unknown	unknown	unknown	unknown	NO	NO	NO	YES	TCGA-OV	NA	3	Stage IIIC	NA	NA	NA	NA
267	Ovary	Serous Cystadenocarcinoma	FEMALE	Dead	1187	WHITE	29	YES	C56.9	8441-03-01	C56.9	unknown	unknown	0	2002	WITH TUMOR	2	6	2009	unknown	unknown	No	NA	1	Other	GX	unknown	11-20 mm	unknown	Bilateral	Tumor resection	unknown	unknown	unknown	unknown	unknown	unknown	YES	YES	YES	YES	TCGA-OV	NA	3	Stage IIIC	NA	NA	NA	NA
128	Ovary	Serous Cystadenocarcinoma	FEMALE	Alive	268	WHITE	23	YES	C56.9	8441-03-01	C56.9	unknown	unknown	0	2007	TUMOR FREE	2	6	2009	NOT HISPANIC OR LATINO	unknown	No	NA	NA	unknown	G3	unknown	1-10 mm	unknown	Right	Tumor resection	unknown	unknown	unknown	unknown	unknown	unknown	NO	YES	NO	YES	TCGA-OV	NA	3	Stage IIIC	NA	NA	NA	NA
195	Ovary	Serous Cystadenocarcinoma	FEMALE	Alive	113	WHITE	24	YES	C56.9	8441-03-01	C56.9	unknown	unknown	1	2009	unknown	2	6	2009	unknown	unknown	No	NA	NA	unknown	G3	unknown	1-10 mm	unknown	Bilateral	Tumor resection	unknown	unknown	unknown	unknown	unknown	unknown	NO	YES	NO	YES	TCGA-OV	NA	3	Stage IIIC	NA	NA	NA	NA
264	Ovary	Serous Cystadenocarcinoma	FEMALE	Dead	1448	WHITE	29	YES	C56.9	8441-03-01	C56.9	unknown	unknown	1	1993	WITH TUMOR	2	6	2009	unknown	unknown	No	NA	NA	unknown	G2	unknown	11-20 mm	unknown	Bilateral	Tumor resection	unknown	unknown	unknown	unknown	unknown	unknown	NO	YES	NO	YES	TCGA-OV	NA	3	Stage IIIC	NA	NA	NA	NA
315	Ovary	Serous Cystadenocarcinoma	FEMALE	Alive	885	WHITE	36	YES	C56.9	8441-03-01	C56.9	unknown	unknown	0	2007	unknown	2	6	2009	unknown	unknown	No	NA	0	Preoperative	G3	unknown	1-10 mm	unknown	Bilateral	Cytology (e.g. Peritoneal or pleural fluid)	unknown	unknown	YES	unknown	unknown	unknown	NO	NO	NO	YES	TCGA-OV	NA	3	Stage IIIC	NA	NA	NA	NA
157	Ovary	Serous Cystadenocarcinoma	FEMALE	Alive	243	WHITE	24	YES	C56.9	8441-03-01	C56.9	unknown	unknown	1	2008	TUMOR FREE	16	4	2009	unknown	unknown	No	NA	0	Other	G3	unknown	>20 mm	unknown	Bilateral	Fine needle aspiration biopsy	unknown	unknown	unknown	unknown	unknown	unknown	NO	YES	NO	YES	TCGA-OV	NA	3	Stage IIIC	NA	NA	NA	NA
269	Ovary	Serous Cystadenocarcinoma	FEMALE	Dead	1032	WHITE	29	YES	C56.9	8441-03-01	C56.9	unknown	unknown	0	2003	WITH TUMOR	2	6	2009	unknown	unknown	No	NA	NA	unknown	G2	unknown	1-10 mm	unknown	Right	Tumor resection	unknown	unknown	NO	unknown	unknown	unknown	YES	YES	NO	YES	TCGA-OV	NA	3	Stage IIIC	NA	NA	NA	NA
76	Ovary	Serous Cystadenocarcinoma	FEMALE	Alive	1455	WHITE	13	YES	C56.9	8441-03-01	C56.9	unknown	unknown	0	2005	TUMOR FREE	20	3	2009	NOT HISPANIC OR LATINO	unknown	No	80	NA	Pre-Adjuvant Therapy	G3	unknown	unknown	unknown	Left	Tumor resection	unknown	unknown	unknown	unknown	unknown	unknown	YES	YES	NO	YES	TCGA-OV	NA	3	Stage IIIC	NA	NA	NA	NA
86	Ovary	Serous Cystadenocarcinoma	FEMALE	Alive	201	WHITE	13	YES	C56.9	8441-03-01	C56.9	unknown	unknown	0	2008	TUMOR FREE	20	3	2009	NOT HISPANIC OR LATINO	unknown	No	60	NA	Pre-Adjuvant Therapy	G3	unknown	1-10 mm	unknown	Bilateral	Cytology (e.g. Peritoneal or pleural fluid)	unknown	unknown	unknown	unknown	unknown	unknown	YES	YES	NO	YES	TCGA-OV	NA	3	Stage IIIC	NA	NA	NA	NA
131	Ovary	Serous Cystadenocarcinoma	FEMALE	Dead	1562	WHITE	23	YES	C56.9	8441-03-01	C56.9	unknown	unknown	1	1999	WITH TUMOR	19	2	2009	NOT HISPANIC OR LATINO	unknown	No	NA	NA	unknown	G3	unknown	1-10 mm	unknown	Right	Tumor resection	unknown	unknown	unknown	unknown	unknown	unknown	YES	NO	YES	YES	TCGA-OV	NA	3	Stage IIIC	NA	NA	NA	NA
308	Ovary	Serous Cystadenocarcinoma	FEMALE	Alive	918	unknown	31	YES	C56.9	8441-03-01	C56.9	unknown	unknown	0	2006	WITH TUMOR	20	10	2009	unknown	unknown	No	NA	NA	unknown	G3	unknown	No Macroscopic disease	unknown	Bilateral	Tumor resection	unknown	YES	NO	unknown	unknown	unknown	YES	YES	NO	YES	TCGA-OV	NA	3	Stage IIIC	NA	NA	NA	NA
237	Ovary	Serous Cystadenocarcinoma	FEMALE	Dead	1249	WHITE	25	YES	C56.9	8441-03-01	C56.9	unknown	unknown	1	2002	WITH TUMOR	27	3	2009	NOT HISPANIC OR LATINO	unknown	No	NA	NA	unknown	G3	unknown	1-10 mm	unknown	Bilateral	Tumor resection	unknown	unknown	unknown	unknown	unknown	unknown	YES	YES	NO	YES	TCGA-OV	NA	3	Stage IIIC	NA	NA	NA	NA
354	Ovary	Serous Cystadenocarcinoma	FEMALE	Dead	1161	WHITE	61	YES	C56.9	8441-03-01	C56.9	unknown	unknown	0	2001	unknown	30	11	2009	NOT HISPANIC OR LATINO	unknown	No	NA	NA	unknown	G2	unknown	unknown	unknown	Bilateral	Tumor resection	unknown	unknown	unknown	unknown	unknown	unknown	YES	NO	NO	YES	TCGA-OV	NA	3	Stage IIIC	NA	NA	NA	NA
373	Ovary	Serous Cystadenocarcinoma	FEMALE	Dead	676	WHITE	61	YES	C56.9	8441-03-01	C56.9	unknown	unknown	0	1999	unknown	7	12	2009	NOT HISPANIC OR LATINO	unknown	No	NA	NA	unknown	G3	unknown	unknown	unknown	Right	Tumor resection	unknown	YES	YES	unknown	unknown	unknown	YES	YES	NO	YES	TCGA-OV	NA	2	Stage IIC	NA	NA	NA	NA
117	Ovary	Serous Cystadenocarcinoma	FEMALE	Alive	837	WHITE	20	YES	C56.9	8441-03-01	C56.9	unknown	unknown	0	2007	TUMOR FREE	2	6	2009	NOT HISPANIC OR LATINO	unknown	No	NA	0	Post-Adjuvant Therapy	GX	unknown	11-20 mm	unknown	Bilateral	Tumor resection	unknown	YES	YES	unknown	unknown	unknown	NO	YES	NO	YES	TCGA-OV	NA	3	Stage IIIC	NA	NA	NA	NA
292	Ovary	Serous Cystadenocarcinoma	FEMALE	Dead	2621	WHITE	29	YES	C56.9	8441-03-01	C56.9	unknown	unknown	1	1998	WITH TUMOR	9	2	2010	unknown	unknown	No	NA	NA	unknown	G2	R1	11-20 mm	unknown	Left	Tumor resection	unknown	NO	unknown	unknown	unknown	unknown	YES	YES	YES	YES	TCGA-OV	NA	3	Stage IIIC	NA	NA	NA	NA
217	Ovary	Serous Cystadenocarcinoma	FEMALE	Dead	962	ASIAN	24	YES	C56.9	8441-03-01	C56.9	unknown	unknown	0	1999	WITH TUMOR	5	4	2010	unknown	unknown	No	NA	NA	unknown	G3	unknown	>20 mm	unknown	Bilateral	Tumor resection	unknown	YES	YES	unknown	unknown	unknown	YES	YES	NO	YES	TCGA-OV	NA	3	Stage IIIC	NA	NA	NA	NA
350	Ovary	Serous Cystadenocarcinoma	FEMALE	Alive	1127	WHITE	61	YES	C56.9	8441-03-01	C56.9	unknown	unknown	0	2006	TUMOR FREE	1	10	2009	NOT HISPANIC OR LATINO	unknown	No	NA	NA	unknown	G3	unknown	1-10 mm	unknown	Bilateral	Tumor resection	unknown	YES	YES	unknown	unknown	unknown	NO	YES	NO	YES	TCGA-OV	NA	2	Stage IIC	NA	NA	NA	NA
288	Ovary	Serous Cystadenocarcinoma	FEMALE	Alive	255	WHITE	29	YES	C56.9	8441-03-01	C56.9	unknown	unknown	1	2009	TUMOR FREE	2	6	2009	unknown	unknown	No	NA	1	Pre-Adjuvant Therapy	G3	unknown	No Macroscopic disease	unknown	Bilateral	Tumor resection	unknown	unknown	unknown	unknown	unknown	unknown	NO	YES	NO	YES	TCGA-OV	NA	3	Stage IIIC	NA	NA	NA	NA
79	Ovary	Serous Cystadenocarcinoma	FEMALE	Alive	843	WHITE	13	YES	C56.9	8441-03-01	C56.9	unknown	unknown	0	2005	WITH TUMOR	25	2	2009	NOT HISPANIC OR LATINO	unknown	No	80	NA	Pre-Adjuvant Therapy	G3	R1	1-10 mm	unknown	Bilateral	Cytology (e.g. Peritoneal or pleural fluid)	unknown	unknown	unknown	unknown	unknown	unknown	YES	YES	NO	YES	TCGA-OV	NA	4	Stage IV	NA	NA	NA	NA
81	Ovary	Serous Cystadenocarcinoma	FEMALE	Alive	644	WHITE	13	YES	C56.9	8441-03-01	C56.9	unknown	unknown	0	2006	TUMOR FREE	25	2	2009	NOT HISPANIC OR LATINO	unknown	No	NA	NA	unknown	G3	unknown	No Macroscopic disease	unknown	Bilateral	Tumor resection	unknown	unknown	unknown	unknown	unknown	unknown	NO	YES	NO	YES	TCGA-OV	NA	3	Stage IIIC	NA	NA	NA	NA
297	Ovary	Serous Cystadenocarcinoma	FEMALE	Dead	1158	WHITE	30	YES	C56.9	8441-03-01	C56.9	unknown	unknown	1	2001	WITH TUMOR	2	6	2009	NOT HISPANIC OR LATINO	unknown	No	NA	NA	unknown	G3	unknown	1-10 mm	ASHKENAZI	Bilateral	Tumor resection	unknown	NO	YES	unknown	unknown	unknown	YES	YES	YES	YES	TCGA-OV	NA	4	Stage IV	NA	NA	NA	NA
361	Ovary	Serous Cystadenocarcinoma	FEMALE	Alive	1212	WHITE	61	YES	C56.9	8441-03-01	C56.9	unknown	unknown	1	2006	WITH TUMOR	8	12	2009	NOT HISPANIC OR LATINO	unknown	No	NA	NA	unknown	G3	unknown	11-20 mm	unknown	Bilateral	Tumor resection	unknown	YES	YES	unknown	unknown	unknown	YES	YES	NO	YES	TCGA-OV	NA	3	Stage IIIC	NA	NA	NA	NA
143	Ovary	Serous Cystadenocarcinoma	FEMALE	Alive	3525	WHITE	23	YES	C56.9	8441-03-01	C56.9	unknown	unknown	0	1999	TUMOR FREE	20	11	2009	NOT HISPANIC OR LATINO	unknown	No	NA	NA	unknown	G3	unknown	No Macroscopic disease	unknown	Left	Tumor resection	unknown	YES	NO	unknown	unknown	unknown	YES	YES	NO	YES	TCGA-OV	NA	3	Stage IIIC	NA	NA	NA	NA
313	Ovary	Serous Cystadenocarcinoma	FEMALE	Alive	67	WHITE	31	YES	C56.9	8441-03-01	C56.9	unknown	unknown	0	2009	WITH TUMOR	20	10	2009	NOT HISPANIC OR LATINO	unknown	No	NA	NA	unknown	G2	unknown	unknown	unknown	Bilateral	Excisional Biopsy	unknown	YES	YES	unknown	unknown	unknown	NO	YES	NO	YES	TCGA-OV	NA	4	Stage IV	NA	NA	NA	NA
151	Ovary	Serous Cystadenocarcinoma	FEMALE	Dead	1646	BLACK OR AFRICAN AMERICAN	24	YES	C56.9	8441-03-01	C56.9	unknown	unknown	0	2001	WITH TUMOR	9	3	2009	unknown	unknown	No	NA	NA	unknown	G3	unknown	1-10 mm	unknown	Bilateral	Tumor resection	unknown	unknown	unknown	unknown	unknown	unknown	YES	YES	NO	YES	TCGA-OV	NA	3	Stage IIIC	NA	NA	NA	NA
192	Ovary	Serous Cystadenocarcinoma	FEMALE	Dead	1163	WHITE	24	YES	C56.9	8441-03-01	C56.9	unknown	unknown	0	2001	WITH TUMOR	13	5	2009	unknown	unknown	No	NA	NA	unknown	G3	unknown	1-10 mm	unknown	Bilateral	Tumor resection	unknown	unknown	unknown	unknown	unknown	unknown	YES	YES	NO	YES	TCGA-OV	NA	3	Stage IIIC	NA	NA	NA	NA
114	Ovary	Serous Cystadenocarcinoma	FEMALE	Alive	1296	BLACK OR AFRICAN AMERICAN	13	YES	C56.9	8441-03-01	C56.9	NO	YES	1	2009	TUMOR FREE	26	5	2013	unknown	No	No	70	NA	Pre-Adjuvant Therapy	G3	RX	No Macroscopic disease	unknown	Bilateral	Tumor resection	unknown	unknown	unknown	NO	YES	Complete Remission/Response	NO	YES	NO	YES	TCGA-OV	NA	3	Stage IIIC	NA	NA	NA	NA
109	Ovary	Serous Cystadenocarcinoma	FEMALE	Alive	127	WHITE	13	YES	C56.9	8441-03-01	C56.9	unknown	unknown	1	2008	TUMOR FREE	31	3	2009	NOT HISPANIC OR LATINO	unknown	No	40	NA	Pre-Adjuvant Therapy	G3	unknown	1-10 mm	ASHKENAZI	Bilateral	Cytology (e.g. Peritoneal or pleural fluid)	unknown	unknown	unknown	unknown	unknown	unknown	YES	YES	NO	YES	TCGA-OV	NA	4	Stage IV	NA	NA	NA	NA
271	Ovary	Serous Cystadenocarcinoma	FEMALE	Dead	515	WHITE	29	YES	C56.9	8441-03-01	C56.9	unknown	unknown	0	2004	WITH TUMOR	2	6	2009	unknown	unknown	No	NA	1	Post-Adjuvant Therapy	G3	unknown	unknown	unknown	Bilateral	Tumor resection	unknown	YES	YES	unknown	unknown	unknown	YES	YES	NO	YES	TCGA-OV	NA	3	Stage IIIC	NA	NA	NA	NA
301	Ovary	Serous Cystadenocarcinoma	FEMALE	Dead	1366	WHITE	30	YES	C56.9	8441-03-01	C56.9	unknown	unknown	0	2002	WITH TUMOR	2	6	2009	HISPANIC OR LATINO	unknown	No	NA	NA	unknown	G3	unknown	>20 mm	unknown	Bilateral	Tumor resection	unknown	NO	NO	unknown	unknown	unknown	YES	YES	YES	YES	TCGA-OV	NA	3	Stage IIIC	NA	NA	NA	NA
368	Ovary	Serous Cystadenocarcinoma	FEMALE	Dead	197	WHITE	61	YES	C56.9	8441-03-01	C56.9	unknown	unknown	1	1999	WITH TUMOR	7	12	2009	unknown	unknown	No	NA	NA	unknown	G3	unknown	unknown	unknown	Right	Tumor resection	unknown	unknown	unknown	unknown	unknown	unknown	NO	YES	NO	YES	TCGA-OV	NA	3	Stage IIIC	NA	NA	NA	NA
273	Ovary	Serous Cystadenocarcinoma	FEMALE	Dead	555	WHITE	29	YES	C56.9	8441-03-01	C56.9	unknown	unknown	0	2005	WITH TUMOR	2	6	2009	unknown	unknown	No	NA	0	Post-Adjuvant Therapy	G2	unknown	>20 mm	unknown	Bilateral	Tumor resection	unknown	unknown	unknown	unknown	unknown	unknown	YES	YES	NO	YES	TCGA-OV	NA	3	Stage IIIC	NA	NA	NA	NA
78	Ovary	Serous Cystadenocarcinoma	FEMALE	Alive	1364	WHITE	13	YES	C56.9	8441-03-01	C56.9	unknown	unknown	0	2005	WITH TUMOR	20	3	2009	NOT HISPANIC OR LATINO	unknown	No	NA	NA	unknown	G3	unknown	1-10 mm	unknown	Bilateral	Cytology (e.g. Peritoneal or pleural fluid)	unknown	unknown	unknown	unknown	unknown	unknown	YES	YES	NO	YES	TCGA-OV	NA	4	Stage IV	NA	NA	NA	NA
106	Ovary	Serous Cystadenocarcinoma	FEMALE	Alive	128	WHITE	13	YES	C56.9	8441-03-01	C56.9	unknown	unknown	1	2008	TUMOR FREE	31	3	2009	NOT HISPANIC OR LATINO	unknown	No	NA	NA	unknown	G3	unknown	1-10 mm	unknown	Bilateral	Cytology (e.g. Peritoneal or pleural fluid)	unknown	unknown	unknown	unknown	unknown	unknown	YES	YES	NO	YES	TCGA-OV	NA	3	Stage IIIC	NA	NA	NA	NA
77	Ovary	Serous Cystadenocarcinoma	FEMALE	Alive	1367	WHITE	13	YES	C56.9	8441-03-01	C56.9	unknown	unknown	0	2005	TUMOR FREE	25	2	2009	NOT HISPANIC OR LATINO	unknown	No	60	NA	Pre-Adjuvant Therapy	G3	unknown	1-10 mm	unknown	Bilateral	Tumor resection	unknown	unknown	unknown	unknown	unknown	unknown	NO	YES	NO	YES	TCGA-OV	NA	3	Stage IIIC	NA	NA	NA	NA
231	Ovary	Serous Cystadenocarcinoma	FEMALE	Dead	1064	WHITE	25	YES	C56.9	8441-03-01	C56.9	unknown	unknown	0	2000	WITH TUMOR	27	3	2009	NOT HISPANIC OR LATINO	unknown	No	NA	NA	unknown	G3	unknown	1-10 mm	unknown	Bilateral	Tumor resection	unknown	unknown	unknown	unknown	unknown	unknown	YES	YES	NO	YES	TCGA-OV	NA	3	Stage IIIC	NA	NA	NA	NA
230	Ovary	Serous Cystadenocarcinoma	FEMALE	Dead	61	WHITE	25	YES	C56.9	8441-03-01	C56.9	unknown	unknown	1	2000	unknown	27	3	2009	NOT HISPANIC OR LATINO	unknown	No	NA	NA	unknown	G3	unknown	unknown	unknown	Bilateral	Tumor resection	unknown	unknown	unknown	unknown	unknown	unknown	NO	YES	NO	YES	TCGA-OV	NA	3	Stage IIIC	NA	NA	NA	NA
341	Ovary	Serous Cystadenocarcinoma	FEMALE	Alive	956	WHITE	61	YES	C56.9	8441-03-01	C56.9	unknown	unknown	0	2007	WITH TUMOR	2	6	2009	NOT HISPANIC OR LATINO	unknown	No	NA	NA	unknown	G3	unknown	11-20 mm	unknown	Bilateral	Tumor resection	unknown	YES	YES	unknown	unknown	unknown	YES	YES	NO	YES	TCGA-OV	NA	3	Stage IIIC	NA	NA	NA	NA
190	Ovary	Serous Cystadenocarcinoma	FEMALE	Dead	2742	WHITE	24	YES	C56.9	8441-03-01	C56.9	unknown	unknown	0	1996	WITH TUMOR	13	5	2009	unknown	unknown	No	NA	NA	unknown	G3	unknown	unknown	unknown	Bilateral	Tumor resection	unknown	unknown	unknown	unknown	unknown	unknown	YES	YES	NO	YES	TCGA-OV	NA	3	Stage IIIB	NA	NA	NA	NA
362	Ovary	Serous Cystadenocarcinoma	FEMALE	Alive	932	WHITE	61	YES	C56.9	8441-03-01	C56.9	unknown	unknown	1	2006	unknown	8	12	2009	NOT HISPANIC OR LATINO	unknown	No	NA	NA	unknown	G2	unknown	unknown	unknown	Left	Tumor resection	unknown	YES	YES	unknown	unknown	unknown	NO	YES	YES	YES	TCGA-OV	NA	2	Stage IIC	NA	NA	NA	NA
203	Ovary	Serous Cystadenocarcinoma	FEMALE	Dead	2467	WHITE	24	YES	C56.9	8441-03-01	C56.9	unknown	unknown	0	1998	WITH TUMOR	5	4	2010	unknown	unknown	No	100	0	Post-Adjuvant Therapy	G3	unknown	1-10 mm	unknown	Bilateral	Tumor resection	unknown	unknown	unknown	unknown	unknown	unknown	YES	YES	YES	YES	TCGA-OV	NA	3	Stage IIIC	NA	NA	NA	NA
181	Ovary	Serous Cystadenocarcinoma	FEMALE	Dead	1259	WHITE	24	YES	C56.9	8441-03-01	C56.9	unknown	unknown	1	1997	WITH TUMOR	13	5	2009	unknown	unknown	No	NA	0	Other	G3	unknown	1-10 mm	unknown	Left	Tumor resection	unknown	unknown	YES	unknown	unknown	unknown	YES	YES	NO	YES	TCGA-OV	NA	3	Stage IIIC	NA	NA	NA	NA
125	Ovary	Serous Cystadenocarcinoma	FEMALE	Alive	816	WHITE	23	YES	C56.9	8441-03-01	C56.9	unknown	unknown	0	2004	WITH TUMOR	23	2	2009	NOT HISPANIC OR LATINO	unknown	No	NA	NA	unknown	G3	unknown	1-10 mm	unknown	Left	Tumor resection	unknown	unknown	unknown	unknown	unknown	unknown	YES	YES	NO	YES	TCGA-OV	NA	3	Stage IIIC	NA	NA	NA	NA
348	Ovary	Serous Cystadenocarcinoma	FEMALE	Alive	176	BLACK OR AFRICAN AMERICAN	61	YES	C56.9	8441-03-01	C56.9	unknown	unknown	0	2008	TUMOR FREE	1	10	2009	NOT HISPANIC OR LATINO	unknown	No	NA	NA	unknown	G3	unknown	No Macroscopic disease	unknown	Bilateral	Cytology (e.g. Peritoneal or pleural fluid)	unknown	NO	NO	unknown	unknown	unknown	NO	YES	NO	YES	TCGA-OV	NA	3	Stage IIIB	NA	NA	NA	NA
155	Ovary	Serous Cystadenocarcinoma	FEMALE	Alive	194	WHITE	24	YES	C56.9	8441-03-01	C56.9	unknown	unknown	0	2008	TUMOR FREE	1	4	2009	unknown	unknown	No	NA	NA	unknown	G3	unknown	1-10 mm	unknown	Bilateral	Tumor resection	unknown	unknown	unknown	unknown	unknown	unknown	NO	YES	NO	YES	TCGA-OV	NA	4	Stage IV	NA	NA	NA	NA
280	Peritoneum ovary	Serous Cystadenocarcinoma	FEMALE	Dead	1199	WHITE	29	YES	C48.2	8441-03-01	C48.2	unknown	unknown	1	2006	WITH TUMOR	2	6	2009	unknown	unknown	No	NA	0	Post-Adjuvant Therapy	G2	unknown	11-20 mm	unknown	Right	Tumor resection	unknown	unknown	unknown	unknown	unknown	unknown	YES	YES	NO	YES	TCGA-OV	NA	3	Stage IIIC	NA	NA	NA	NA
340	Ovary	Serous Cystadenocarcinoma	FEMALE	Dead	637	WHITE	61	YES	C56.9	8441-03-01	C56.9	unknown	unknown	0	2007	WITH TUMOR	2	6	2009	NOT HISPANIC OR LATINO	unknown	No	NA	NA	unknown	G3	unknown	No Macroscopic disease	unknown	Bilateral	Tumor resection	unknown	YES	YES	unknown	unknown	unknown	YES	YES	NO	YES	TCGA-OV	NA	3	Stage IIIC	NA	NA	NA	NA
215	Ovary	Serous Cystadenocarcinoma	FEMALE	Dead	11	WHITE	24	YES	C56.9	8441-03-01	C56.9	unknown	unknown	0	1992	WITH TUMOR	15	3	2010	unknown	unknown	No	NA	NA	unknown	G3	unknown	1-10 mm	unknown	Right	Tumor resection	unknown	unknown	unknown	unknown	unknown	unknown	NO	NO	NO	YES	TCGA-OV	NA	3	Stage IIIC	NA	NA	NA	NA
334	Ovary	Serous Cystadenocarcinoma	FEMALE	Dead	1046	WHITE	59	YES	C56.9	8441-03-01	C56.9	unknown	unknown	1	2005	WITH TUMOR	29	1	2010	NOT HISPANIC OR LATINO	unknown	No	NA	NA	unknown	G3	unknown	1-10 mm	unknown	Left	Tumor resection	unknown	unknown	YES	unknown	unknown	unknown	YES	YES	NO	YES	TCGA-OV	NA	3	Stage IIIC	NA	NA	NA	NA
369	Ovary	Serous Cystadenocarcinoma	FEMALE	Alive	2338	WHITE	61	YES	C56.9	8441-03-01	C56.9	unknown	unknown	0	2003	unknown	7	12	2009	unknown	unknown	No	NA	NA	unknown	G2	unknown	No Macroscopic disease	unknown	Bilateral	Tumor resection	unknown	NO	unknown	unknown	unknown	unknown	YES	YES	NO	YES	TCGA-OV	NA	2	Stage IIC	NA	NA	NA	NA
96	Ovary	Serous Cystadenocarcinoma	FEMALE	Dead	681	WHITE	13	YES	C56.9	8441-03-01	C56.9	unknown	unknown	1	2002	WITH TUMOR	31	3	2009	NOT HISPANIC OR LATINO	unknown	No	NA	NA	unknown	GX	unknown	unknown	unknown	unknown	Tumor resection	unknown	unknown	unknown	unknown	unknown	unknown	YES	YES	NO	YES	TCGA-OV	NA	4	Stage IV	NA	NA	NA	NA
119	Ovary	Serous Cystadenocarcinoma	FEMALE	Alive	89	WHITE	20	YES	C56.9	8441-03-01	C56.9	unknown	unknown	1	2008	TUMOR FREE	2	6	2009	NOT HISPANIC OR LATINO	unknown	No	NA	0	Post-Adjuvant Therapy	G3	unknown	No Macroscopic disease	unknown	Bilateral	Tumor resection	unknown	unknown	NO	unknown	unknown	unknown	NO	YES	NO	YES	TCGA-OV	NA	3	Stage IIIC	NA	NA	NA	NA
105	Ovary	Serous Cystadenocarcinoma	FEMALE	Alive	999	WHITE	13	YES	C56.9	8441-03-01	C56.9	unknown	unknown	0	2006	WITH TUMOR	31	3	2009	NOT HISPANIC OR LATINO	unknown	No	80	NA	Pre-Adjuvant Therapy	G3	unknown	>20 mm	unknown	Bilateral	Cytology (e.g. Peritoneal or pleural fluid)	unknown	unknown	unknown	unknown	unknown	unknown	YES	YES	NO	YES	TCGA-OV	NA	4	Stage IV	NA	NA	NA	NA
177	Ovary	Serous Cystadenocarcinoma	FEMALE	Dead	1955	WHITE	24	YES	C56.9	8441-03-01	C56.9	unknown	unknown	0	1997	unknown	2	6	2009	unknown	unknown	No	NA	NA	unknown	G3	unknown	1-10 mm	unknown	Bilateral	Tumor resection	unknown	unknown	unknown	unknown	unknown	unknown	NO	YES	NO	YES	TCGA-OV	NA	3	Stage IIIC	NA	NA	NA	NA
207	Ovary	Serous Cystadenocarcinoma	FEMALE	Dead	1059	WHITE	24	YES	C56.9	8441-03-01	C56.9	unknown	unknown	1	1995	unknown	15	3	2010	unknown	unknown	No	NA	NA	unknown	G3	unknown	>20 mm	unknown	Bilateral	Tumor resection	unknown	unknown	YES	unknown	unknown	unknown	NO	YES	NO	YES	TCGA-OV	NA	3	Stage IIIC	NA	NA	NA	NA
259	Ovary	Serous Cystadenocarcinoma	FEMALE	Dead	1278	WHITE	25	YES	C56.9	8441-03-01	C56.9	unknown	unknown	1	2004	WITH TUMOR	5	1	2010	NOT HISPANIC OR LATINO	unknown	No	NA	NA	unknown	G3	unknown	No Macroscopic disease	unknown	Bilateral	Tumor resection	unknown	unknown	unknown	unknown	unknown	unknown	YES	YES	NO	YES	TCGA-OV	NA	3	Stage IIIC	NA	NA	NA	NA
298	Ovary	Serous Cystadenocarcinoma	FEMALE	Dead	1579	WHITE	30	YES	C56.9	8441-03-01	C56.9	unknown	unknown	0	2002	WITH TUMOR	2	6	2009	NOT HISPANIC OR LATINO	unknown	No	NA	NA	unknown	G3	unknown	1-10 mm	unknown	Bilateral	Tumor resection	unknown	NO	NO	unknown	unknown	unknown	YES	YES	NO	YES	TCGA-OV	NA	3	Stage IIIC	NA	NA	NA	NA
27	Ovary	Serous Cystadenocarcinoma	FEMALE	Dead	1169	WHITE	9	YES	C56.9	8441-03-01	C56.9	unknown	unknown	1	2000	WITH TUMOR	2	6	2009	NOT HISPANIC OR LATINO	unknown	No	NA	NA	unknown	G3	unknown	1-10 mm	unknown	Right	Tumor resection	unknown	NO	NO	unknown	unknown	unknown	NO	YES	NO	YES	TCGA-OV	NA	3	Stage IIIC	NA	NA	NA	NA
318	Ovary	Serous Cystadenocarcinoma	FEMALE	Alive	686	ASIAN	36	YES	C56.9	8441-03-01	C56.9	unknown	unknown	0	2007	WITH TUMOR	2	6	2009	unknown	unknown	No	NA	0	Preoperative	G3	unknown	>20 mm	unknown	Bilateral	Tumor resection	unknown	unknown	unknown	unknown	unknown	unknown	YES	YES	NO	YES	TCGA-OV	NA	3	Stage IIIC	NA	NA	NA	NA
275	Ovary	Serous Cystadenocarcinoma	FEMALE	Dead	951	WHITE	29	YES	C56.9	8441-03-01	C56.9	unknown	unknown	0	2006	WITH TUMOR	2	6	2009	unknown	unknown	No	NA	0	Post-Adjuvant Therapy	G2	unknown	1-10 mm	unknown	Bilateral	Tumor resection	unknown	unknown	unknown	unknown	unknown	unknown	YES	YES	NO	YES	TCGA-OV	NA	3	Stage IIIC	NA	NA	NA	NA
68	Ovary	Serous Cystadenocarcinoma	FEMALE	Alive	2259	WHITE	13	YES	C56.9	8441-03-01	C56.9	unknown	unknown	1	2002	TUMOR FREE	25	2	2009	NOT HISPANIC OR LATINO	unknown	No	NA	NA	unknown	G3	unknown	1-10 mm	unknown	Bilateral	Tumor resection	unknown	unknown	unknown	unknown	unknown	unknown	NO	YES	NO	YES	TCGA-OV	NA	3	Stage IIIC	NA	NA	NA	NA
307	Ovary	Serous Cystadenocarcinoma	FEMALE	Alive	1386	WHITE	31	YES	C56.9	8441-03-01	C56.9	unknown	unknown	0	2005	WITH TUMOR	19	10	2009	NOT HISPANIC OR LATINO	unknown	No	NA	NA	unknown	G3	unknown	No Macroscopic disease	unknown	Bilateral	Tumor resection	unknown	YES	YES	unknown	unknown	unknown	YES	YES	NO	YES	TCGA-OV	NA	3	Stage IIIC	NA	NA	NA	NA
169	Ovary	Serous Cystadenocarcinoma	FEMALE	Dead	1324	WHITE	24	YES	C56.9	8441-03-01	C56.9	unknown	unknown	0	1999	WITH TUMOR	12	5	2009	unknown	unknown	No	NA	NA	unknown	G3	unknown	1-10 mm	unknown	Bilateral	Tumor resection	unknown	unknown	NO	unknown	unknown	unknown	YES	YES	NO	YES	TCGA-OV	NA	3	Stage IIIC	NA	NA	NA	NA
158	Ovary	Serous Cystadenocarcinoma	FEMALE	Alive	239	WHITE	24	YES	C56.9	8441-03-01	C56.9	unknown	unknown	1	2008	TUMOR FREE	15	4	2009	unknown	unknown	No	NA	NA	unknown	G3	unknown	11-20 mm	unknown	Bilateral	Tumor resection	unknown	unknown	unknown	unknown	unknown	unknown	NO	YES	NO	YES	TCGA-OV	NA	3	Stage IIIC	NA	NA	NA	NA
311	Ovary	Serous Cystadenocarcinoma	FEMALE	Alive	204	ASIAN	31	YES	C56.9	8441-03-01	C56.9	unknown	unknown	0	2008	WITH TUMOR	20	10	2009	NOT HISPANIC OR LATINO	unknown	No	NA	1	Pre-Adjuvant Therapy	G3	unknown	unknown	unknown	Bilateral	Tumor resection	unknown	NO	NO	unknown	unknown	unknown	YES	YES	NO	YES	TCGA-OV	NA	3	Stage IIIC	NA	NA	NA	NA
216	Ovary	Serous Cystadenocarcinoma	FEMALE	Dead	1446	WHITE	24	YES	C56.9	8441-03-01	C56.9	unknown	unknown	0	1993	WITH TUMOR	16	3	2010	unknown	unknown	No	NA	NA	unknown	G3	unknown	No Macroscopic disease	unknown	Bilateral	Tumor resection	unknown	unknown	YES	unknown	unknown	unknown	YES	YES	NO	YES	TCGA-OV	NA	2	Stage IIB	NA	NA	NA	NA
102	Ovary	Serous Cystadenocarcinoma	FEMALE	Alive	1652	WHITE	13	YES	C56.9	8441-03-01	C56.9	unknown	unknown	0	2004	WITH TUMOR	31	3	2009	NOT HISPANIC OR LATINO	unknown	No	80	NA	Pre-Adjuvant Therapy	G3	unknown	unknown	unknown	unknown	Cytology (e.g. Peritoneal or pleural fluid)	unknown	unknown	unknown	unknown	unknown	unknown	YES	YES	NO	YES	TCGA-OV	NA	3	Stage IIIC	NA	NA	NA	NA
257	Ovary	Serous Cystadenocarcinoma	FEMALE	Dead	1369	WHITE	25	YES	C56.9	8441-03-01	C56.9	unknown	unknown	1	2004	WITH TUMOR	5	1	2010	NOT HISPANIC OR LATINO	unknown	No	NA	NA	unknown	G3	unknown	1-10 mm	unknown	Bilateral	Tumor resection	unknown	unknown	unknown	unknown	unknown	unknown	YES	YES	NO	YES	TCGA-OV	NA	3	Stage IIIC	NA	NA	NA	NA
261	Ovary	Serous Cystadenocarcinoma	FEMALE	Dead	883	AMERICAN INDIAN OR ALASKA NATIVE	25	YES	C56.9	8441-03-01	C56.9	unknown	unknown	0	2005	WITH TUMOR	5	1	2010	NOT HISPANIC OR LATINO	unknown	No	NA	NA	unknown	G3	unknown	No Macroscopic disease	unknown	Bilateral	Tumor resection	unknown	unknown	unknown	unknown	unknown	unknown	YES	YES	NO	YES	TCGA-OV	NA	3	Stage IIIC	NA	NA	NA	NA
142	Ovary	Serous Cystadenocarcinoma	FEMALE	Alive	16	WHITE	23	YES	C56.9	8441-03-01	C56.9	unknown	unknown	1	2009	unknown	2	6	2009	NOT HISPANIC OR LATINO	unknown	No	NA	NA	unknown	G3	unknown	1-10 mm	unknown	Right	Tumor resection	unknown	NO	NO	unknown	unknown	unknown	NO	YES	NO	YES	TCGA-OV	NA	2	Stage IIC	NA	NA	NA	NA
265	Ovary	Serous Cystadenocarcinoma	FEMALE	Dead	1470	WHITE	29	YES	C56.9	8441-03-01	C56.9	unknown	unknown	0	1995	WITH TUMOR	2	6	2009	unknown	unknown	No	NA	NA	unknown	G2	unknown	1-10 mm	unknown	Bilateral	Tumor resection	unknown	unknown	unknown	unknown	unknown	unknown	YES	YES	NO	YES	TCGA-OV	NA	3	Stage IIIC	NA	NA	NA	NA
225	Ovary	Serous Cystadenocarcinoma	FEMALE	Dead	1620	WHITE	24	YES	C56.9	8441-03-01	C56.9	unknown	unknown	0	1993	WITH TUMOR	16	3	2010	unknown	unknown	No	NA	NA	unknown	G3	unknown	>20 mm	unknown	Bilateral	Tumor resection	unknown	unknown	unknown	unknown	unknown	unknown	YES	YES	NO	YES	TCGA-OV	NA	3	Stage IIIC	NA	NA	NA	NA
6	Ovary	Serous Cystadenocarcinoma	FEMALE	Alive	1919	WHITE	4	YES	C56.9	8441-03-01	C56.9	unknown	unknown	1	2004	TUMOR FREE	26	3	2009	NOT HISPANIC OR LATINO	unknown	No	100	0	Preoperative	G3	unknown	No Macroscopic disease	unknown	Bilateral	Cytology (e.g. Peritoneal or pleural fluid)	unknown	NO	NO	unknown	unknown	unknown	NO	YES	NO	YES	TCGA-OV	NA	4	Stage IV	NA	NA	NA	NA
356	Ovary	Serous Cystadenocarcinoma	FEMALE	Alive	168	WHITE	61	YES	C56.9	8441-03-01	C56.9	unknown	unknown	0	2009	WITH TUMOR	8	12	2009	NOT HISPANIC OR LATINO	unknown	No	NA	NA	unknown	G3	unknown	1-10 mm	unknown	Bilateral	Tumor resection	unknown	YES	YES	unknown	unknown	unknown	NO	YES	NO	YES	TCGA-OV	NA	3	Stage IIIC	NA	NA	NA	NA
279	Ovary	Serous Cystadenocarcinoma	FEMALE	Alive	2032	BLACK OR AFRICAN AMERICAN	29	YES	C56.9	8441-03-01	C56.9	unknown	unknown	0	2004	WITH TUMOR	2	6	2009	unknown	unknown	No	NA	0	Other	G2	unknown	1-10 mm	unknown	Bilateral	Tumor resection	unknown	unknown	unknown	unknown	unknown	unknown	YES	YES	YES	YES	TCGA-OV	NA	2	Stage IIC	NA	NA	NA	NA
46	Ovary	Serous Cystadenocarcinoma	FEMALE	Dead	446	WHITE	10	YES	C56.9	8441-03-01	C56.9	unknown	unknown	1	2003	WITH TUMOR	6	3	2009	NOT HISPANIC OR LATINO	unknown	No	NA	1	Preoperative	G3	unknown	No Macroscopic disease	unknown	Bilateral	Tumor resection	unknown	unknown	unknown	unknown	unknown	unknown	YES	YES	NO	YES	TCGA-OV	NA	3	Stage IIIC	NA	NA	NA	NA
92	Ovary	Serous Cystadenocarcinoma	FEMALE	Alive	128	WHITE	13	YES	C56.9	8441-03-01	C56.9	unknown	unknown	1	2008	WITH TUMOR	20	3	2009	NOT HISPANIC OR LATINO	unknown	No	NA	NA	unknown	G3	unknown	>20 mm	unknown	unknown	Tumor resection	unknown	unknown	unknown	unknown	unknown	unknown	YES	YES	NO	YES	TCGA-OV	NA	3	Stage IIIC	NA	NA	NA	NA
89	Ovary	Serous Cystadenocarcinoma	FEMALE	Alive	180	WHITE	13	YES	C56.9	8441-03-01	C56.9	unknown	unknown	0	2008	WITH TUMOR	20	3	2009	NOT HISPANIC OR LATINO	unknown	No	NA	NA	unknown	G3	unknown	>20 mm	ASHKENAZI	unknown	Tumor resection	unknown	unknown	unknown	unknown	unknown	unknown	YES	YES	NO	YES	TCGA-OV	NA	3	Stage IIIC	NA	NA	NA	NA
332	Ovary	Serous Cystadenocarcinoma	FEMALE	Alive	3532	WHITE	59	YES	C56.9	8441-03-01	C56.9	NO	YES	0	1999	TUMOR FREE	29	1	2010	NOT HISPANIC OR LATINO	unknown	No	NA	NA	unknown	G3	unknown	1-10 mm	unknown	Bilateral	Tumor resection	unknown	unknown	unknown	unknown	unknown	unknown	YES	NO	NO	YES	TCGA-OV	NA	3	Stage IIIC	NA	NA	NA	NA
326	Ovary	Serous Cystadenocarcinoma	FEMALE	Dead	53	WHITE	57	YES	C56.9	8441-03-01	C56.9	unknown	unknown	0	2007	WITH TUMOR	2	6	2009	NOT HISPANIC OR LATINO	unknown	No	NA	NA	unknown	G3	unknown	11-20 mm	unknown	Bilateral	Tumor resection	unknown	YES	YES	unknown	unknown	unknown	NO	YES	NO	YES	TCGA-OV	NA	3	Stage IIIC	NA	NA	NA	NA
71	Ovary	Serous Cystadenocarcinoma	FEMALE	Alive	2099	WHITE	13	YES	C56.9	8441-03-01	C56.9	unknown	unknown	1	2003	WITH TUMOR	25	2	2009	NOT HISPANIC OR LATINO	unknown	No	80	NA	Pre-Adjuvant Therapy	G3	unknown	No Macroscopic disease	ASHKENAZI	Bilateral	Fine needle aspiration biopsy	unknown	unknown	unknown	unknown	unknown	unknown	YES	YES	NO	YES	TCGA-OV	NA	4	Stage IV	NA	NA	NA	NA
202	Ovary	Serous Cystadenocarcinoma	FEMALE	Dead	336	WHITE	24	YES	C56.9	8441-03-01	C56.9	unknown	unknown	1	1998	WITH TUMOR	15	3	2010	unknown	unknown	No	NA	NA	unknown	G3	unknown	11-20 mm	unknown	Bilateral	Cytology (e.g. Peritoneal or pleural fluid)	unknown	unknown	unknown	unknown	unknown	unknown	YES	YES	NO	YES	TCGA-OV	NA	3	Stage IIIC	NA	NA	NA	NA
233	Ovary	Serous Cystadenocarcinoma	FEMALE	Dead	1155	WHITE	25	YES	C56.9	8441-03-01	C56.9	unknown	unknown	1	2001	WITH TUMOR	27	3	2009	NOT HISPANIC OR LATINO	unknown	No	NA	NA	unknown	G3	unknown	1-10 mm	unknown	Bilateral	Tumor resection	unknown	unknown	unknown	unknown	unknown	unknown	YES	YES	NO	YES	TCGA-OV	NA	3	Stage IIIC	NA	NA	NA	NA
87	Ovary	Serous Cystadenocarcinoma	FEMALE	Alive	224	WHITE	13	YES	C56.9	8441-03-01	C56.9	unknown	unknown	0	2008	TUMOR FREE	20	3	2009	NOT HISPANIC OR LATINO	unknown	No	80	NA	Pre-Adjuvant Therapy	G3	unknown	1-10 mm	unknown	Bilateral	Cytology (e.g. Peritoneal or pleural fluid)	unknown	unknown	unknown	unknown	unknown	unknown	YES	YES	NO	YES	TCGA-OV	NA	4	Stage IV	NA	NA	NA	NA
150	Ovary	Serous Cystadenocarcinoma	FEMALE	Dead	679	WHITE	24	YES	C56.9	8441-03-01	C56.9	unknown	unknown	1	2003	WITH TUMOR	10	3	2009	unknown	unknown	No	NA	NA	unknown	G3	unknown	1-10 mm	unknown	Bilateral	Cytology (e.g. Peritoneal or pleural fluid)	unknown	unknown	unknown	unknown	unknown	unknown	YES	YES	NO	YES	TCGA-OV	NA	3	Stage IIIC	NA	NA	NA	NA
144	Ovary	Serous Cystadenocarcinoma	FEMALE	Alive	2661	WHITE	23	YES	C56.9	8441-03-01	C56.9	unknown	unknown	1	2001	TUMOR FREE	20	11	2009	NOT HISPANIC OR LATINO	unknown	No	NA	NA	unknown	G3	unknown	No Macroscopic disease	ASHKENAZI	Bilateral	Tumor resection	unknown	YES	YES	unknown	unknown	unknown	NO	YES	NO	YES	TCGA-OV	NA	3	Stage IIIC	NA	NA	NA	NA
104	Ovary	Serous Cystadenocarcinoma	FEMALE	Alive	1168	WHITE	13	YES	C56.9	8441-03-01	C56.9	unknown	unknown	0	2005	WITH TUMOR	31	3	2009	NOT HISPANIC OR LATINO	unknown	No	80	NA	Pre-Adjuvant Therapy	G3	unknown	unknown	ASHKENAZI	unknown	Incisional Biopsy	unknown	unknown	unknown	unknown	unknown	unknown	YES	YES	NO	YES	TCGA-OV	NA	3	Stage IIIC	NA	NA	NA	NA
335	Ovary	Serous Cystadenocarcinoma	FEMALE	Dead	65	WHITE	59	YES	C56.9	8441-03-01	C56.9	unknown	unknown	0	2006	WITH TUMOR	29	1	2010	NOT HISPANIC OR LATINO	unknown	No	NA	NA	unknown	G3	unknown	>20 mm	unknown	Right	Tumor resection	unknown	unknown	YES	unknown	unknown	unknown	NO	YES	NO	YES	TCGA-OV	NA	4	Stage IV	NA	NA	NA	NA
159	Ovary	Serous Cystadenocarcinoma	FEMALE	Dead	23	BLACK OR AFRICAN AMERICAN	24	YES	C56.9	8441-03-01	C56.9	unknown	unknown	1	2008	unknown	16	4	2009	unknown	unknown	No	NA	NA	unknown	G3	unknown	1-10 mm	unknown	Bilateral	Tumor resection	unknown	unknown	unknown	unknown	unknown	unknown	NO	NO	NO	YES	TCGA-OV	NA	3	Stage IIIC	NA	NA	NA	NA
32	Ovary	Serous Cystadenocarcinoma	FEMALE	Alive	1684	WHITE	9	YES	C56.9	8441-03-01	C56.9	unknown	unknown	0	2004	WITH TUMOR	2	6	2009	NOT HISPANIC OR LATINO	unknown	No	NA	NA	unknown	G3	unknown	unknown	unknown	Right	Tumor resection	unknown	NO	NO	unknown	unknown	unknown	NO	YES	NO	YES	TCGA-OV	NA	3	Stage IIIC	NA	NA	NA	NA
122	Ovary	Serous Cystadenocarcinoma	FEMALE	Dead	1511	WHITE	23	YES	C56.9	8441-03-01	C56.9	unknown	unknown	1	2003	WITH TUMOR	20	2	2009	NOT HISPANIC OR LATINO	unknown	No	NA	NA	unknown	G3	unknown	1-10 mm	unknown	Left	Tumor resection	unknown	YES	YES	unknown	unknown	unknown	YES	YES	NO	YES	TCGA-OV	NA	3	Stage IIIC	NA	NA	NA	NA
152	Ovary	Serous Cystadenocarcinoma	FEMALE	Dead	1933	WHITE	24	YES	C56.9	8441-03-01	C56.9	unknown	unknown	0	2001	WITH TUMOR	9	3	2009	unknown	unknown	No	NA	NA	unknown	G3	unknown	>20 mm	unknown	Left	Cytology (e.g. Peritoneal or pleural fluid)	unknown	unknown	unknown	unknown	unknown	unknown	YES	YES	YES	YES	TCGA-OV	NA	4	Stage IV	NA	NA	NA	NA
304	Ovary	Serous Cystadenocarcinoma	FEMALE	Dead	1114	WHITE	30	YES	C56.9	8441-03-01	C56.9	unknown	unknown	1	2003	WITH TUMOR	2	6	2009	NOT HISPANIC OR LATINO	unknown	No	NA	NA	unknown	G2	unknown	1-10 mm	unknown	Bilateral	Tumor resection	unknown	unknown	unknown	unknown	unknown	unknown	YES	YES	NO	YES	TCGA-OV	NA	4	Stage IV	NA	NA	NA	NA
186	Ovary	Serous Cystadenocarcinoma	FEMALE	Dead	1384	WHITE	24	YES	C56.9	8441-03-01	C56.9	unknown	unknown	1	1999	WITH TUMOR	13	5	2009	unknown	unknown	No	NA	0	Other	G3	unknown	1-10 mm	unknown	Bilateral	Tumor resection	unknown	unknown	unknown	unknown	unknown	unknown	YES	YES	NO	YES	TCGA-OV	NA	3	Stage IIIC	NA	NA	NA	NA
36	Ovary	Serous Cystadenocarcinoma	FEMALE	Alive	186	ASIAN	9	YES	C56.9	8441-03-01	C56.9	unknown	unknown	1	2009	TUMOR FREE	2	11	2009	NOT HISPANIC OR LATINO	unknown	No	NA	NA	unknown	G3	unknown	No Macroscopic disease	unknown	Right	Tumor resection	unknown	NO	NO	unknown	unknown	unknown	NO	YES	NO	YES	TCGA-OV	NA	2	Stage IIB	NA	NA	NA	NA
222	Omentum	Serous Cystadenocarcinoma	FEMALE	Dead	1102	WHITE	24	YES	C48.1	8441-03-01	C48.1	unknown	unknown	0	1997	WITH TUMOR	19	2	2010	unknown	unknown	No	NA	0	Post-Adjuvant Therapy	G3	unknown	1-10 mm	unknown	unknown	Tumor resection	unknown	unknown	unknown	unknown	unknown	unknown	YES	YES	NO	YES	TCGA-OV	NA	3	Stage IIIC	NA	NA	NA	NA
5	Ovary	Serous Cystadenocarcinoma	FEMALE	Dead	361	WHITE	4	YES	C56.9	8441-03-01	C56.9	unknown	unknown	1	2002	WITH TUMOR	26	3	2009	NOT HISPANIC OR LATINO	unknown	No	NA	3	Preoperative	G3	unknown	>20 mm	unknown	Bilateral	Tumor resection	unknown	unknown	unknown	unknown	unknown	unknown	NO	YES	NO	YES	TCGA-OV	NA	4	Stage IV	NA	NA	NA	NA
132	Ovary	Serous Cystadenocarcinoma	FEMALE	Alive	1658	WHITE	23	YES	C56.9	8441-03-01	C56.9	unknown	unknown	0	2003	TUMOR FREE	23	2	2009	HISPANIC OR LATINO	unknown	No	NA	NA	unknown	G3	unknown	No Macroscopic disease	unknown	Right	Tumor resection	unknown	YES	YES	unknown	unknown	unknown	YES	YES	NO	YES	TCGA-OV	NA	3	Stage IIIC	NA	NA	NA	NA
320	Ovary	Serous Cystadenocarcinoma	FEMALE	Alive	783	ASIAN	36	YES	C56.9	8441-03-01	C56.9	unknown	unknown	0	2007	TUMOR FREE	2	6	2009	unknown	unknown	No	NA	NA	unknown	G2	unknown	No Macroscopic disease	unknown	Bilateral	Cytology (e.g. Peritoneal or pleural fluid)	unknown	unknown	unknown	unknown	unknown	unknown	NO	YES	YES	YES	TCGA-OV	NA	2	Stage IIC	NA	NA	NA	NA
321	Ovary	Serous Cystadenocarcinoma	FEMALE	Dead	737	unknown	36	YES	C56.9	8441-03-01	C56.9	unknown	unknown	1	2007	WITH TUMOR	2	6	2009	unknown	unknown	No	NA	1	Preoperative	G3	unknown	>20 mm	unknown	unknown	Cytology (e.g. Peritoneal or pleural fluid)	unknown	unknown	unknown	unknown	unknown	unknown	YES	YES	NO	YES	TCGA-OV	NA	3	Stage IIIC	NA	NA	NA	NA
345	Ovary	Serous Cystadenocarcinoma	FEMALE	Alive	1364	WHITE	61	YES	C56.9	8441-03-01	C56.9	unknown	unknown	0	2005	TUMOR FREE	2	6	2009	NOT HISPANIC OR LATINO	unknown	No	NA	NA	unknown	G3	unknown	1-10 mm	unknown	Bilateral	Cytology (e.g. Peritoneal or pleural fluid)	unknown	YES	YES	unknown	unknown	unknown	NO	YES	NO	YES	TCGA-OV	NA	4	Stage IV	NA	NA	NA	NA
167	Ovary	Serous Cystadenocarcinoma	FEMALE	Dead	583	WHITE	24	YES	C56.9	8441-03-01	C56.9	unknown	unknown	1	1999	WITH TUMOR	12	5	2009	unknown	unknown	No	NA	NA	unknown	G3	unknown	1-10 mm	unknown	Bilateral	Tumor resection	unknown	unknown	YES	unknown	unknown	unknown	YES	YES	NO	YES	TCGA-OV	NA	3	Stage IIIC	NA	NA	NA	NA
3	Ovary	Serous Cystadenocarcinoma	FEMALE	Alive	1418	WHITE	4	YES	C56.9	8441-03-01	C56.9	unknown	unknown	1	2005	WITH TUMOR	14	7	2009	NOT HISPANIC OR LATINO	unknown	No	NA	1	Preoperative	G3	unknown	1-10 mm	unknown	Bilateral	Tumor resection	unknown	unknown	unknown	unknown	unknown	unknown	YES	YES	NO	YES	TCGA-OV	NA	3	Stage IIIC	NA	NA	NA	NA
187	Ovary	Serous Cystadenocarcinoma	FEMALE	Dead	1451	BLACK OR AFRICAN AMERICAN	24	YES	C56.9	8441-03-01	C56.9	unknown	unknown	1	1999	WITH TUMOR	13	5	2009	unknown	unknown	No	NA	NA	unknown	G3	unknown	1-10 mm	unknown	Left	Tumor resection	unknown	unknown	unknown	unknown	unknown	unknown	YES	YES	NO	YES	TCGA-OV	NA	3	Stage IIIC	NA	NA	NA	NA
229	Ovary	Serous Cystadenocarcinoma	FEMALE	Dead	1279	WHITE	25	YES	C56.9	8441-03-01	C56.9	unknown	unknown	0	2000	WITH TUMOR	27	3	2009	NOT HISPANIC OR LATINO	unknown	No	NA	NA	unknown	G3	unknown	1-10 mm	unknown	Right	Tumor resection	unknown	unknown	unknown	unknown	unknown	unknown	YES	YES	NO	YES	TCGA-OV	NA	3	Stage IIIC	NA	NA	NA	NA
74	Ovary	Serous Cystadenocarcinoma	FEMALE	Alive	1736	WHITE	13	YES	C56.9	8441-03-01	C56.9	unknown	unknown	0	2004	TUMOR FREE	20	3	2009	NOT HISPANIC OR LATINO	unknown	No	60	NA	Pre-Adjuvant Therapy	G3	unknown	unknown	unknown	Bilateral	Cytology (e.g. Peritoneal or pleural fluid)	unknown	unknown	unknown	unknown	unknown	unknown	NO	YES	NO	YES	TCGA-OV	NA	3	Stage IIIC	NA	NA	NA	NA
319	Ovary	Serous Cystadenocarcinoma	FEMALE	Alive	915	unknown	36	YES	C56.9	8441-03-01	C56.9	unknown	unknown	1	2006	WITH TUMOR	2	6	2009	unknown	unknown	No	NA	2	Pre-Adjuvant Therapy	G3	unknown	>20 mm	unknown	unknown	Tumor resection	unknown	YES	YES	unknown	unknown	unknown	YES	YES	NO	YES	TCGA-OV	NA	3	Stage IIIC	NA	NA	NA	NA
103	Ovary	Serous Cystadenocarcinoma	FEMALE	Alive	1144	WHITE	13	YES	C56.9	8441-03-01	C56.9	unknown	unknown	1	2006	WITH TUMOR	31	3	2009	NOT HISPANIC OR LATINO	unknown	No	60	NA	Pre-Adjuvant Therapy	G3	unknown	>20 mm	ASHKENAZI	unknown	Tumor resection	unknown	unknown	unknown	unknown	unknown	unknown	YES	YES	NO	YES	TCGA-OV	NA	3	Stage IIIC	NA	NA	NA	NA
285	Ovary	Serous Cystadenocarcinoma	FEMALE	Alive	360	BLACK OR AFRICAN AMERICAN	29	YES	C56.9	8441-03-01	C56.9	unknown	unknown	1	2008	WITH TUMOR	2	6	2009	unknown	unknown	No	NA	0	Post-Adjuvant Therapy	G3	unknown	>20 mm	unknown	Bilateral	Tumor resection	unknown	unknown	unknown	unknown	unknown	unknown	NO	YES	NO	YES	TCGA-OV	NA	3	Stage IIIC	NA	NA	NA	NA
126	Ovary	Serous Cystadenocarcinoma	FEMALE	Dead	976	WHITE	23	YES	C56.9	8441-03-01	C56.9	unknown	unknown	0	2005	unknown	24	2	2009	NOT HISPANIC OR LATINO	unknown	No	NA	NA	unknown	G3	unknown	1-10 mm	unknown	Right	Tumor resection	unknown	YES	YES	unknown	unknown	unknown	YES	YES	NO	YES	TCGA-OV	NA	3	Stage IIIC	NA	NA	NA	NA
129	Ovary	Serous Cystadenocarcinoma	FEMALE	Alive	886	WHITE	23	YES	C56.9	8441-03-01	C56.9	unknown	unknown	1	2006	TUMOR FREE	24	2	2009	NOT HISPANIC OR LATINO	unknown	No	NA	NA	unknown	G3	unknown	1-10 mm	unknown	Left	Tumor resection	unknown	YES	YES	unknown	unknown	unknown	YES	YES	NO	YES	TCGA-OV	NA	3	Stage IIIC	NA	NA	NA	NA
62	Ovary	Serous Cystadenocarcinoma	FEMALE	Alive	265	WHITE	13	YES	C56.9	8441-03-01	C56.9	unknown	unknown	0	2008	TUMOR FREE	25	2	2009	NOT HISPANIC OR LATINO	unknown	No	80	NA	Pre-Adjuvant Therapy	G3	unknown	1-10 mm	unknown	Bilateral	Tumor resection	unknown	unknown	unknown	unknown	unknown	unknown	YES	YES	NO	YES	TCGA-OV	NA	3	Stage IIIC	NA	NA	NA	NA
266	Ovary	Serous Cystadenocarcinoma	FEMALE	Alive	3096	WHITE	29	YES	C56.9	8441-03-01	C56.9	unknown	unknown	1	2001	WITH TUMOR	2	6	2009	unknown	unknown	No	NA	0	Other	G3	unknown	>20 mm	unknown	Left	Tumor resection	unknown	YES	YES	unknown	unknown	unknown	YES	YES	YES	YES	TCGA-OV	NA	3	Stage IIIC	NA	NA	NA	NA
193	Ovary	Serous Cystadenocarcinoma	FEMALE	Alive	253	WHITE	24	YES	C56.9	8441-03-01	C56.9	unknown	unknown	0	2009	TUMOR FREE	2	6	2009	unknown	unknown	No	NA	0	Other	G3	unknown	1-10 mm	unknown	Bilateral	Tumor resection	unknown	unknown	YES	unknown	unknown	unknown	NO	YES	NO	YES	TCGA-OV	NA	3	Stage IIIC	NA	NA	NA	NA
243	Ovary	Serous Cystadenocarcinoma	FEMALE	Dead	627	WHITE	25	YES	C56.9	8441-03-01	C56.9	unknown	unknown	1	2002	WITH TUMOR	2	6	2009	NOT HISPANIC OR LATINO	unknown	No	NA	NA	unknown	G3	unknown	1-10 mm	unknown	unknown	Tumor resection	unknown	unknown	unknown	unknown	unknown	unknown	YES	YES	NO	YES	TCGA-OV	NA	3	Stage IIIC	NA	NA	NA	NA
161	Ovary	Serous Cystadenocarcinoma	FEMALE	Alive	183	WHITE	24	YES	C56.9	8441-03-01	C56.9	unknown	unknown	1	2008	TUMOR FREE	16	4	2009	unknown	unknown	No	NA	NA	unknown	G3	unknown	1-10 mm	unknown	Bilateral	Tumor resection	unknown	unknown	unknown	unknown	unknown	unknown	NO	YES	NO	YES	TCGA-OV	NA	3	Stage IIIC	NA	NA	NA	NA
358	Ovary	Serous Cystadenocarcinoma	FEMALE	Alive	547	WHITE	61	YES	C56.9	8441-03-01	C56.9	unknown	unknown	0	2008	WITH TUMOR	8	12	2009	NOT HISPANIC OR LATINO	unknown	No	NA	NA	unknown	G3	unknown	11-20 mm	unknown	Bilateral	Tumor resection	unknown	YES	YES	unknown	unknown	unknown	NO	YES	NO	YES	TCGA-OV	NA	3	Stage IIIC	NA	NA	NA	NA
149	Ovary	Serous Cystadenocarcinoma	FEMALE	Dead	1264	WHITE	24	YES	C56.9	8441-03-01	C56.9	unknown	unknown	0	2003	WITH TUMOR	11	5	2009	unknown	unknown	No	NA	NA	unknown	G3	unknown	>20 mm	unknown	Bilateral	Cytology (e.g. Peritoneal or pleural fluid)	unknown	unknown	unknown	unknown	unknown	unknown	YES	YES	YES	YES	TCGA-OV	NA	4	Stage IV	NA	NA	NA	NA
302	Ovary	Serous Cystadenocarcinoma	FEMALE	Dead	1058	WHITE	30	YES	C56.9	8441-03-01	C56.9	unknown	unknown	1	2002	unknown	2	6	2009	NOT HISPANIC OR LATINO	unknown	No	NA	NA	unknown	G3	unknown	1-10 mm	unknown	Bilateral	Tumor resection	unknown	unknown	unknown	unknown	unknown	unknown	NO	NO	NO	NO	TCGA-OV	NA	3	Stage IIIC	NA	NA	NA	NA
234	Ovary	Serous Cystadenocarcinoma	FEMALE	Dead	1033	WHITE	25	YES	C56.9	8441-03-01	C56.9	unknown	unknown	1	2001	WITH TUMOR	27	3	2009	NOT HISPANIC OR LATINO	unknown	No	NA	0	Post-Adjuvant Therapy	G3	unknown	No Macroscopic disease	unknown	Bilateral	Tumor resection	unknown	unknown	unknown	unknown	unknown	unknown	YES	YES	NO	YES	TCGA-OV	NA	3	Stage IIIC	NA	NA	NA	NA
260	Ovary	Serous Cystadenocarcinoma	FEMALE	Dead	90	WHITE	25	YES	C56.9	8441-03-01	C56.9	unknown	unknown	1	2004	unknown	5	1	2010	NOT HISPANIC OR LATINO	unknown	No	NA	NA	unknown	G3	unknown	1-10 mm	unknown	Bilateral	Tumor resection	unknown	unknown	unknown	unknown	unknown	unknown	NO	NO	NO	YES	TCGA-OV	NA	3	Stage IIIC	NA	NA	NA	NA
223	Omentum	Serous Cystadenocarcinoma	FEMALE	Dead	506	WHITE	24	YES	C48.1	8441-03-01	C48.1	unknown	unknown	0	1995	unknown	26	2	2010	unknown	unknown	No	NA	NA	unknown	G3	unknown	>20 mm	unknown	Right	Tumor resection	unknown	unknown	unknown	unknown	unknown	unknown	NO	YES	NO	YES	TCGA-OV	NA	unknown	unknown	NA	NA	NA	NA
220	Ovary	Serous Cystadenocarcinoma	FEMALE	Dead	25	WHITE	24	YES	C56.9	8441-03-01	C56.9	unknown	unknown	1	1999	WITH TUMOR	19	2	2010	unknown	unknown	No	NA	NA	unknown	G3	unknown	>20 mm	unknown	Bilateral	Tumor resection	unknown	unknown	YES	unknown	unknown	unknown	NO	YES	NO	YES	TCGA-OV	NA	3	Stage IIIC	NA	NA	NA	NA
120	Ovary	Serous Cystadenocarcinoma	FEMALE	Alive	81	WHITE	20	YES	C56.9	8441-03-01	C56.9	unknown	unknown	0	2008	TUMOR FREE	2	6	2009	NOT HISPANIC OR LATINO	unknown	No	NA	NA	unknown	G3	unknown	No Macroscopic disease	unknown	Bilateral	Cytology (e.g. Peritoneal or pleural fluid)	unknown	unknown	YES	unknown	unknown	unknown	NO	YES	NO	YES	TCGA-OV	NA	4	Stage IV	NA	NA	NA	NA
370	Ovary	Serous Cystadenocarcinoma	FEMALE	Dead	629	WHITE	61	YES	C56.9	8441-03-01	C56.9	unknown	unknown	0	1999	WITH TUMOR	7	12	2009	NOT HISPANIC OR LATINO	unknown	No	NA	NA	unknown	G3	unknown	>20 mm	unknown	Bilateral	Cytology (e.g. Peritoneal or pleural fluid)	unknown	NO	NO	unknown	unknown	unknown	YES	YES	NO	YES	TCGA-OV	NA	3	Stage IIIC	NA	NA	NA	NA
127	Ovary	Serous Cystadenocarcinoma	FEMALE	Alive	1503	WHITE	23	YES	C56.9	8441-03-01	C56.9	unknown	unknown	0	2004	WITH TUMOR	23	2	2009	HISPANIC OR LATINO	unknown	No	NA	NA	unknown	G3	unknown	1-10 mm	unknown	Left	Tumor resection	unknown	YES	YES	unknown	unknown	unknown	YES	YES	NO	YES	TCGA-OV	NA	3	Stage IIIC	NA	NA	NA	NA
33	Ovary	Serous Cystadenocarcinoma	FEMALE	Alive	928	WHITE	9	YES	C56.9	8441-03-01	C56.9	unknown	unknown	0	2004	WITH TUMOR	2	6	2009	NOT HISPANIC OR LATINO	unknown	No	NA	NA	unknown	G3	unknown	No Macroscopic disease	unknown	Right	Tumor resection	unknown	NO	NO	unknown	unknown	unknown	NO	YES	NO	YES	TCGA-OV	NA	3	Stage IIIA	NA	NA	NA	NA
282	Ovary	Serous Cystadenocarcinoma	FEMALE	Alive	699	WHITE	29	YES	C56.9	8441-03-01	C56.9	unknown	unknown	0	2007	TUMOR FREE	2	6	2009	unknown	unknown	No	NA	0	Post-Adjuvant Therapy	G3	unknown	1-10 mm	unknown	Bilateral	Tumor resection	unknown	unknown	NO	unknown	unknown	unknown	NO	YES	NO	YES	TCGA-OV	NA	3	Stage IIIC	NA	NA	NA	NA
247	Ovary	Serous Cystadenocarcinoma	FEMALE	Dead	1891	WHITE	25	YES	C56.9	8441-03-01	C56.9	unknown	unknown	1	2002	WITH TUMOR	2	6	2009	NOT HISPANIC OR LATINO	unknown	No	NA	NA	unknown	G3	unknown	1-10 mm	unknown	Bilateral	Tumor resection	unknown	unknown	unknown	unknown	unknown	unknown	YES	YES	NO	YES	TCGA-OV	NA	3	Stage IIIC	NA	NA	NA	NA
24	Ovary	Serous Cystadenocarcinoma	FEMALE	Dead	547	NATIVE HAWAIIAN OR OTHER PACIFIC ISLANDER	9	YES	C56.9	8441-03-01	C56.9	unknown	unknown	1	2001	WITH TUMOR	4	3	2009	NOT HISPANIC OR LATINO	unknown	No	NA	NA	unknown	G3	unknown	1-10 mm	unknown	Bilateral	Tumor resection	unknown	YES	YES	unknown	unknown	unknown	NO	YES	NO	YES	TCGA-OV	NA	3	Stage IIIC	NA	NA	NA	NA
305	Ovary	Serous Cystadenocarcinoma	FEMALE	Dead	914	WHITE	30	YES	C56.9	8441-03-01	C56.9	unknown	unknown	1	2004	WITH TUMOR	2	6	2009	NOT HISPANIC OR LATINO	unknown	No	NA	NA	unknown	G2	unknown	1-10 mm	unknown	Bilateral	Cytology (e.g. Peritoneal or pleural fluid)	unknown	NO	NO	unknown	unknown	unknown	YES	YES	NO	YES	TCGA-OV	NA	3	Stage IIIC	NA	NA	NA	NA
93	Ovary	Serous Cystadenocarcinoma	FEMALE	Dead	1662	WHITE	13	YES	C56.9	8441-03-01	C56.9	unknown	unknown	0	2000	WITH TUMOR	31	3	2009	NOT HISPANIC OR LATINO	unknown	No	NA	NA	Pre-Adjuvant Therapy	G2	unknown	1-10 mm	unknown	Bilateral	Incisional Biopsy	unknown	unknown	unknown	unknown	unknown	unknown	YES	YES	NO	YES	TCGA-OV	NA	4	Stage IV	NA	NA	NA	NA
312	Ovary	Serous Cystadenocarcinoma	FEMALE	Alive	1342	WHITE	31	YES	C56.9	8441-03-01	C56.9	unknown	unknown	1	2005	WITH TUMOR	19	10	2009	NOT HISPANIC OR LATINO	unknown	No	NA	NA	unknown	G3	unknown	unknown	unknown	Left	Tumor resection	unknown	NO	YES	unknown	unknown	unknown	YES	YES	NO	YES	TCGA-OV	NA	3	Stage IIIB	NA	NA	NA	NA
355	Ovary	Serous Cystadenocarcinoma	FEMALE	Alive	61	WHITE	61	YES	C56.9	8441-03-01	C56.9	unknown	unknown	0	2009	WITH TUMOR	8	12	2009	NOT HISPANIC OR LATINO	unknown	No	NA	NA	unknown	G3	unknown	1-10 mm	unknown	Bilateral	Tumor resection	unknown	YES	YES	unknown	unknown	unknown	NO	YES	NO	YES	TCGA-OV	NA	3	Stage IIIC	NA	NA	NA	NA
281	Ovary	Serous Cystadenocarcinoma	FEMALE	Dead	952	WHITE	29	YES	C56.9	8441-03-01	C56.9	unknown	unknown	0	2006	WITH TUMOR	2	6	2009	unknown	unknown	No	NA	0	Post-Adjuvant Therapy	G3	unknown	>20 mm	unknown	Bilateral	Tumor resection	unknown	unknown	unknown	unknown	unknown	unknown	YES	YES	NO	YES	TCGA-OV	NA	4	Stage IV	NA	NA	NA	NA
7	Ovary	Serous Cystadenocarcinoma	FEMALE	Dead	1946	WHITE	4	YES	C56.9	8441-03-01	C56.9	unknown	unknown	0	2003	WITH TUMOR	26	3	2009	unknown	unknown	No	NA	0	Preoperative	G3	unknown	>20 mm	unknown	Bilateral	Tumor resection	unknown	unknown	unknown	unknown	unknown	unknown	YES	YES	NO	YES	TCGA-OV	NA	3	Stage IIIC	NA	NA	NA	NA
300	Ovary	Serous Cystadenocarcinoma	FEMALE	Dead	8	WHITE	30	YES	C56.9	8441-03-01	C56.9	unknown	unknown	1	2001	WITH TUMOR	2	6	2009	NOT HISPANIC OR LATINO	unknown	No	NA	NA	unknown	G3	unknown	unknown	unknown	Right	Tumor resection	unknown	unknown	unknown	unknown	unknown	unknown	NO	NO	NO	YES	TCGA-OV	NA	4	Stage IV	NA	NA	NA	NA
241	Ovary	Serous Cystadenocarcinoma	FEMALE	Dead	518	WHITE	25	YES	C56.9	8441-03-01	C56.9	unknown	unknown	1	2006	WITH TUMOR	2	6	2009	NOT HISPANIC OR LATINO	unknown	No	NA	NA	unknown	G3	unknown	>20 mm	unknown	Right	Tumor resection	unknown	unknown	unknown	unknown	unknown	unknown	YES	YES	NO	YES	TCGA-OV	NA	3	Stage IIIC	NA	NA	NA	NA
359	Ovary	Serous Cystadenocarcinoma	FEMALE	Alive	122	WHITE	61	YES	C56.9	8441-03-01	C56.9	unknown	unknown	0	2008	WITH TUMOR	8	12	2009	NOT HISPANIC OR LATINO	unknown	No	NA	NA	unknown	G2	unknown	1-10 mm	unknown	Bilateral	Cytology (e.g. Peritoneal or pleural fluid)	unknown	YES	YES	unknown	unknown	unknown	NO	YES	NO	YES	TCGA-OV	NA	3	Stage IIIC	NA	NA	NA	NA
25	Ovary	Serous Cystadenocarcinoma	FEMALE	Dead	1082	WHITE	9	YES	C56.9	8441-03-01	C56.9	unknown	unknown	0	2003	WITH TUMOR	4	3	2009	NOT HISPANIC OR LATINO	unknown	No	NA	NA	unknown	G3	unknown	No Macroscopic disease	unknown	Left	Tumor resection	unknown	YES	YES	unknown	unknown	unknown	YES	YES	NO	YES	TCGA-OV	NA	3	Stage IIIC	NA	NA	NA	NA
200	Ovary	Serous Cystadenocarcinoma	FEMALE	Dead	690	WHITE	24	YES	C56.9	8441-03-01	C56.9	unknown	unknown	0	2001	WITH TUMOR	19	2	2010	unknown	unknown	No	NA	NA	unknown	G3	unknown	1-10 mm	unknown	Bilateral	Incisional Biopsy	unknown	unknown	YES	unknown	unknown	unknown	YES	YES	NO	YES	TCGA-OV	NA	3	Stage IIIC	NA	NA	NA	NA
289	Ovary	Serous Cystadenocarcinoma	FEMALE	Alive	220	WHITE	29	YES	C56.9	8441-03-01	C56.9	unknown	unknown	0	2009	TUMOR FREE	2	6	2009	unknown	unknown	No	NA	1	Post-Adjuvant Therapy	G3	unknown	1-10 mm	unknown	Right	Tumor resection	unknown	unknown	unknown	unknown	unknown	unknown	NO	YES	NO	YES	TCGA-OV	NA	3	Stage IIIC	NA	NA	NA	NA
240	Ovary	Serous Cystadenocarcinoma	FEMALE	Dead	565	WHITE	25	YES	C56.9	8441-03-01	C56.9	unknown	unknown	1	2006	WITH TUMOR	2	6	2009	NOT HISPANIC OR LATINO	unknown	No	NA	NA	unknown	G3	unknown	No Macroscopic disease	unknown	Bilateral	Tumor resection	unknown	unknown	unknown	unknown	unknown	unknown	YES	YES	NO	YES	TCGA-OV	NA	4	Stage IV	NA	NA	NA	NA
136	Ovary	Serous Cystadenocarcinoma	FEMALE	Alive	139	WHITE	23	YES	C56.9	8441-03-01	C56.9	unknown	unknown	1	2008	unknown	20	2	2009	NOT HISPANIC OR LATINO	unknown	No	NA	NA	unknown	G3	unknown	>20 mm	ASHKENAZI	Left	Tumor resection	unknown	YES	YES	unknown	unknown	unknown	YES	YES	NO	YES	TCGA-OV	NA	3	Stage IIIC	NA	NA	NA	NA
17	Ovary	Serous Cystadenocarcinoma	FEMALE	Dead	885	BLACK OR AFRICAN AMERICAN	4	YES	C56.9	8441-03-01	C56.9	unknown	unknown	1	2001	WITH TUMOR	3	6	2009	unknown	unknown	No	NA	0	unknown	G3	unknown	1-10 mm	unknown	Bilateral	Cytology (e.g. Peritoneal or pleural fluid)	unknown	unknown	unknown	unknown	unknown	unknown	YES	YES	NO	YES	TCGA-OV	NA	4	Stage IV	NA	NA	NA	NA
179	Ovary	Serous Cystadenocarcinoma	FEMALE	Dead	1249	WHITE	24	YES	C56.9	8441-03-01	C56.9	unknown	unknown	0	1997	WITH TUMOR	13	5	2009	unknown	unknown	No	NA	1	Post-Adjuvant Therapy	G3	unknown	1-10 mm	unknown	Left	Tumor resection	unknown	unknown	unknown	unknown	unknown	unknown	YES	YES	NO	YES	TCGA-OV	NA	3	Stage IIIC	NA	NA	NA	NA
287	Ovary	Serous Cystadenocarcinoma	FEMALE	Alive	454	WHITE	29	YES	C56.9	8441-03-01	C56.9	unknown	unknown	1	2008	TUMOR FREE	2	6	2009	unknown	unknown	No	NA	NA	unknown	G3	unknown	No Macroscopic disease	unknown	Right	Tumor resection	unknown	unknown	unknown	unknown	unknown	unknown	NO	YES	NO	YES	TCGA-OV	NA	3	Stage IIIC	NA	NA	NA	NA
2	Ovary	Serous Cystadenocarcinoma	FEMALE	Dead	1247	WHITE	4	YES	C56.9	8441-03-01	C56.9	unknown	unknown	1	2002	WITH TUMOR	26	3	2009	NOT HISPANIC OR LATINO	unknown	No	NA	1	Preoperative	G3	unknown	1-10 mm	unknown	Bilateral	Tumor resection	unknown	unknown	NO	unknown	unknown	unknown	YES	YES	NO	YES	TCGA-OV	NA	3	Stage IIIC	NA	NA	NA	NA
165	Ovary	Serous Cystadenocarcinoma	FEMALE	Alive	529	WHITE	24	YES	C56.9	8441-03-01	C56.9	unknown	unknown	0	2008	WITH TUMOR	16	4	2009	unknown	unknown	No	NA	NA	unknown	G3	unknown	1-10 mm	unknown	Left	Tumor resection	unknown	unknown	unknown	unknown	unknown	unknown	YES	YES	NO	YES	TCGA-OV	NA	3	Stage IIIC	NA	NA	NA	NA
344	Ovary	Serous Cystadenocarcinoma	FEMALE	Dead	1484	WHITE	61	YES	C56.9	8441-03-01	C56.9	unknown	unknown	0	2005	WITH TUMOR	2	6	2009	NOT HISPANIC OR LATINO	unknown	No	NA	NA	unknown	G3	unknown	unknown	unknown	Bilateral	Excisional Biopsy	unknown	YES	YES	unknown	unknown	unknown	YES	YES	NO	YES	TCGA-OV	NA	3	Stage IIIC	NA	NA	NA	NA
30	Ovary	Serous Cystadenocarcinoma	FEMALE	Alive	1752	WHITE	9	YES	C56.9	8441-03-01	C56.9	unknown	unknown	0	2003	WITH TUMOR	2	6	2009	NOT HISPANIC OR LATINO	unknown	No	NA	NA	unknown	G3	unknown	No Macroscopic disease	unknown	Bilateral	Tumor resection	unknown	NO	NO	unknown	unknown	unknown	YES	YES	NO	YES	TCGA-OV	NA	3	Stage IIIC	NA	NA	NA	NA
164	Ovary	Serous Cystadenocarcinoma	FEMALE	Alive	147	unknown	24	YES	C56.9	8441-03-01	C56.9	unknown	unknown	0	2008	WITH TUMOR	15	4	2009	unknown	unknown	No	NA	NA	unknown	G3	unknown	>20 mm	unknown	Bilateral	Tumor resection	unknown	unknown	YES	unknown	unknown	unknown	NO	YES	NO	YES	TCGA-OV	NA	3	Stage IIIC	NA	NA	NA	NA
306	Ovary	Serous Cystadenocarcinoma	FEMALE	Dead	1484	WHITE	30	YES	C56.9	8441-03-01	C56.9	unknown	unknown	0	2004	WITH TUMOR	2	6	2009	NOT HISPANIC OR LATINO	unknown	No	NA	NA	unknown	G3	unknown	1-10 mm	unknown	Left	Tumor resection	unknown	unknown	unknown	unknown	unknown	unknown	YES	YES	NO	YES	TCGA-OV	NA	3	Stage IIIC	NA	NA	NA	NA
98	Ovary	Serous Cystadenocarcinoma	FEMALE	Alive	2521	WHITE	13	YES	C56.9	8441-03-01	C56.9	unknown	unknown	1	2002	WITH TUMOR	31	3	2009	NOT HISPANIC OR LATINO	unknown	No	80	NA	Pre-Adjuvant Therapy	G2	unknown	unknown	unknown	Bilateral	Tumor resection	unknown	unknown	unknown	unknown	unknown	unknown	YES	YES	NO	YES	TCGA-OV	NA	3	Stage IIIC	NA	NA	NA	NA
67	Ovary	Serous Cystadenocarcinoma	FEMALE	Alive	2780	WHITE	13	YES	C56.9	8441-03-01	C56.9	unknown	unknown	1	2000	unknown	25	2	2009	NOT HISPANIC OR LATINO	unknown	No	80	NA	Pre-Adjuvant Therapy	G3	unknown	11-20 mm	unknown	Left	Cytology (e.g. Peritoneal or pleural fluid)	unknown	unknown	unknown	unknown	unknown	unknown	NO	YES	NO	YES	TCGA-OV	NA	3	Stage IIIC	NA	NA	NA	NA
10	Ovary	Serous Cystadenocarcinoma	FEMALE	Alive	989	WHITE	4	YES	C56.9	8441-03-01	C56.9	unknown	unknown	0	2005	unknown	26	3	2009	unknown	unknown	No	NA	1	unknown	G3	unknown	No Macroscopic disease	unknown	Bilateral	Tumor resection	unknown	unknown	unknown	unknown	unknown	unknown	YES	YES	NO	YES	TCGA-OV	NA	3	Stage IIIB	NA	NA	NA	NA
113	Ovary	Serous Cystadenocarcinoma	FEMALE	Alive	262	WHITE	13	YES	C56.9	8441-03-01	C56.9	unknown	unknown	0	2009	TUMOR FREE	16	12	2009	unknown	unknown	No	80	NA	Pre-Adjuvant Therapy	G3	unknown	1-10 mm	unknown	Bilateral	Cytology (e.g. Peritoneal or pleural fluid)	unknown	unknown	unknown	unknown	unknown	unknown	YES	YES	NO	YES	TCGA-OV	NA	4	Stage IV	NA	NA	NA	NA
75	Ovary	Serous Cystadenocarcinoma	FEMALE	Alive	589	ASIAN	13	YES	C56.9	8441-03-01	C56.9	unknown	unknown	0	2004	WITH TUMOR	20	3	2009	NOT HISPANIC OR LATINO	unknown	No	80	NA	Pre-Adjuvant Therapy	G3	unknown	>20 mm	unknown	Bilateral	Tumor resection	unknown	unknown	unknown	unknown	unknown	unknown	YES	YES	NO	YES	TCGA-OV	NA	3	Stage IIIC	NA	NA	NA	NA
293	Ovary	Serous Cystadenocarcinoma	FEMALE	Alive	1977	WHITE	29	YES	C56.9	8441-03-01	C56.9	unknown	unknown	1	2004	TUMOR FREE	9	2	2010	unknown	unknown	No	NA	0	Post-Adjuvant Therapy	G2	R1	>20 mm	unknown	unknown	Tumor resection	unknown	unknown	NO	unknown	unknown	unknown	YES	YES	NO	YES	TCGA-OV	NA	3	Stage IIIC	NA	NA	NA	NA
95	Ovary	Serous Cystadenocarcinoma	FEMALE	Dead	629	WHITE	13	YES	C56.9	8441-03-01	C56.9	unknown	unknown	0	2001	WITH TUMOR	31	3	2009	NOT HISPANIC OR LATINO	unknown	No	80	NA	Pre-Adjuvant Therapy	G2	unknown	1-10 mm	unknown	Bilateral	Incisional Biopsy	unknown	unknown	unknown	unknown	unknown	unknown	YES	YES	NO	YES	TCGA-OV	NA	4	Stage IV	NA	NA	NA	NA
213	Ovary	Serous Cystadenocarcinoma	FEMALE	Dead	1736	WHITE	24	YES	C56.9	8441-03-01	C56.9	unknown	unknown	1	2003	WITH TUMOR	19	2	2010	unknown	unknown	No	NA	0	Other	G3	unknown	1-10 mm	unknown	Bilateral	Tumor resection	unknown	unknown	YES	unknown	unknown	unknown	YES	YES	NO	YES	TCGA-OV	NA	3	Stage IIIC	NA	NA	NA	NA
59	Ovary	Serous Cystadenocarcinoma	FEMALE	Alive	651	WHITE	13	YES	C56.9	8441-03-01	C56.9	unknown	unknown	0	2006	WITH TUMOR	24	2	2009	NOT HISPANIC OR LATINO	unknown	No	NA	NA	unknown	G3	unknown	1-10 mm	unknown	Bilateral	Tumor resection	unknown	unknown	unknown	unknown	unknown	unknown	YES	YES	NO	YES	TCGA-OV	NA	3	Stage IIIC	NA	NA	NA	NA
238	Ovary	Serous Cystadenocarcinoma	FEMALE	Dead	2009	WHITE	25	YES	C56.9	8441-03-01	C56.9	unknown	unknown	0	2001	WITH TUMOR	27	3	2009	NOT HISPANIC OR LATINO	unknown	No	NA	NA	unknown	G3	unknown	1-10 mm	unknown	Bilateral	Tumor resection	unknown	unknown	unknown	unknown	unknown	unknown	YES	YES	NO	YES	TCGA-OV	NA	3	Stage IIIC	NA	NA	NA	NA
18	Ovary	Serous Cystadenocarcinoma	FEMALE	Dead	2561	WHITE	4	YES	C56.9	8441-03-01	C56.9	unknown	unknown	0	2001	WITH TUMOR	2	6	2009	unknown	unknown	No	NA	0	Preoperative	G2	unknown	1-10 mm	unknown	Bilateral	Tumor resection	unknown	unknown	NO	unknown	unknown	unknown	YES	YES	NO	YES	TCGA-OV	NA	3	Stage IIIB	NA	NA	NA	NA
90	Ovary	Serous Cystadenocarcinoma	FEMALE	Alive	208	WHITE	13	YES	C56.9	8441-03-01	C56.9	unknown	unknown	1	2008	WITH TUMOR	20	3	2009	NOT HISPANIC OR LATINO	unknown	No	60	NA	Pre-Adjuvant Therapy	G3	unknown	1-10 mm	unknown	unknown	Incisional Biopsy	unknown	unknown	unknown	unknown	unknown	unknown	YES	YES	NO	YES	TCGA-OV	NA	3	Stage IIIC	NA	NA	NA	NA
166	Ovary	Serous Cystadenocarcinoma	FEMALE	Dead	863	WHITE	24	YES	C56.9	8441-03-01	C56.9	unknown	unknown	1	2000	WITH TUMOR	12	5	2009	unknown	unknown	No	NA	1	Other	G3	unknown	>20 mm	unknown	Bilateral	Tumor resection	unknown	unknown	unknown	unknown	unknown	unknown	YES	YES	NO	YES	TCGA-OV	NA	3	Stage IIIC	NA	NA	NA	NA
123	Ovary	Serous Cystadenocarcinoma	FEMALE	Alive	1233	WHITE	23	YES	C56.9	8441-03-01	C56.9	unknown	unknown	1	2005	WITH TUMOR	23	2	2009	NOT HISPANIC OR LATINO	unknown	No	NA	NA	unknown	G3	unknown	1-10 mm	unknown	Right	Tumor resection	unknown	YES	YES	unknown	unknown	unknown	YES	YES	NO	YES	TCGA-OV	NA	3	Stage IIIC	NA	NA	NA	NA
168	Ovary	Serous Cystadenocarcinoma	FEMALE	Dead	568	WHITE	24	YES	C56.9	8441-03-01	C56.9	unknown	unknown	0	1999	WITH TUMOR	12	5	2009	unknown	unknown	No	NA	NA	unknown	G3	unknown	1-10 mm	unknown	Bilateral	Tumor resection	unknown	unknown	YES	unknown	unknown	unknown	YES	YES	NO	YES	TCGA-OV	NA	3	Stage IIIC	NA	NA	NA	NA
94	Ovary	Serous Cystadenocarcinoma	FEMALE	Dead	895	WHITE	13	YES	C56.9	8441-03-01	C56.9	unknown	unknown	1	2000	WITH TUMOR	31	3	2009	NOT HISPANIC OR LATINO	unknown	No	60	NA	Pre-Adjuvant Therapy	G3	unknown	>20 mm	unknown	unknown	Fine needle aspiration biopsy	unknown	unknown	unknown	unknown	unknown	unknown	YES	YES	NO	YES	TCGA-OV	NA	3	Stage IIIC	NA	NA	NA	NA
28	Ovary	Serous Cystadenocarcinoma	FEMALE	Dead	2717	WHITE	9	YES	C56.9	8441-03-01	C56.9	unknown	unknown	0	2001	WITH TUMOR	2	6	2009	NOT HISPANIC OR LATINO	unknown	No	NA	NA	unknown	G3	unknown	1-10 mm	unknown	Left	Tumor resection	unknown	YES	YES	unknown	unknown	unknown	YES	YES	NO	YES	TCGA-OV	NA	4	Stage IV	NA	NA	NA	NA
210	Ovary	Serous Cystadenocarcinoma	FEMALE	Dead	857	WHITE	24	YES	C56.9	8441-03-01	C56.9	unknown	unknown	1	1996	WITH TUMOR	29	3	2010	unknown	unknown	No	NA	0	Post-Adjuvant Therapy	G3	unknown	1-10 mm	unknown	Left	Tumor resection	unknown	unknown	unknown	unknown	unknown	unknown	YES	YES	NO	YES	TCGA-OV	NA	3	Stage IIIC	NA	NA	NA	NA
343	Ovary	Serous Cystadenocarcinoma	FEMALE	Alive	967	WHITE	61	YES	C56.9	8441-03-01	C56.9	unknown	unknown	1	2006	WITH TUMOR	2	6	2009	unknown	unknown	No	NA	NA	unknown	G3	unknown	No Macroscopic disease	unknown	Bilateral	Tumor resection	unknown	YES	YES	unknown	unknown	unknown	YES	YES	NO	YES	TCGA-OV	NA	3	Stage IIIC	NA	NA	NA	NA
134	Ovary	Serous Cystadenocarcinoma	FEMALE	Dead	949	WHITE	23	YES	C56.9	8441-03-01	C56.9	unknown	unknown	0	2002	WITH TUMOR	19	2	2009	NOT HISPANIC OR LATINO	unknown	No	NA	NA	unknown	G3	unknown	1-10 mm	unknown	Left	Tumor resection	unknown	unknown	YES	unknown	unknown	unknown	NO	YES	NO	YES	TCGA-OV	NA	4	Stage IV	NA	NA	NA	NA
283	Ovary	Serous Cystadenocarcinoma	FEMALE	Alive	741	WHITE	29	YES	C56.9	8441-03-01	C56.9	unknown	unknown	0	2007	WITH TUMOR	2	6	2009	unknown	unknown	No	NA	0	Post-Adjuvant Therapy	G2	unknown	1-10 mm	unknown	Bilateral	Tumor resection	unknown	unknown	unknown	unknown	unknown	unknown	YES	YES	NO	YES	TCGA-OV	NA	3	Stage IIIC	NA	NA	NA	NA
252	Ovary	Serous Cystadenocarcinoma	FEMALE	Dead	396	AMERICAN INDIAN OR ALASKA NATIVE	25	YES	C56.9	8441-03-01	C56.9	unknown	unknown	1	2006	WITH TUMOR	20	11	2009	NOT HISPANIC OR LATINO	unknown	No	NA	NA	unknown	G3	unknown	>20 mm	unknown	Bilateral	Tumor resection	unknown	unknown	unknown	unknown	unknown	unknown	YES	YES	NO	YES	TCGA-OV	NA	3	Stage IIIC	NA	NA	NA	NA
218	Ovary	Serous Cystadenocarcinoma	FEMALE	Alive	2143	WHITE	24	YES	C56.9	8441-03-01	C56.9	unknown	unknown	1	2004	WITH TUMOR	5	4	2010	unknown	unknown	No	NA	0	Post-Adjuvant Therapy	G3	unknown	1-10 mm	unknown	Bilateral	Tumor resection	unknown	unknown	unknown	unknown	unknown	unknown	YES	YES	NO	YES	TCGA-OV	NA	3	Stage IIIC	NA	NA	NA	NA
371	Ovary	Serous Cystadenocarcinoma	FEMALE	Dead	1354	WHITE	61	YES	C56.9	8441-03-01	C56.9	unknown	unknown	0	1998	WITH TUMOR	4	12	2009	NOT HISPANIC OR LATINO	unknown	No	NA	NA	unknown	unknown	unknown	No Macroscopic disease	unknown	Bilateral	Tumor resection	unknown	unknown	unknown	unknown	unknown	unknown	YES	YES	YES	YES	TCGA-OV	NA	3	Stage IIIC	NA	NA	NA	NA
286	Ovary	Serous Cystadenocarcinoma	FEMALE	Alive	374	WHITE	29	YES	C56.9	8441-03-01	C56.9	unknown	unknown	0	2008	WITH TUMOR	2	6	2009	unknown	unknown	No	NA	0	Post-Adjuvant Therapy	G2	unknown	>20 mm	unknown	Bilateral	Tumor resection	unknown	unknown	unknown	unknown	unknown	unknown	NO	YES	NO	YES	TCGA-OV	NA	3	Stage IIIC	NA	NA	NA	NA
162	Ovary	Serous Cystadenocarcinoma	FEMALE	Alive	181	WHITE	24	YES	C56.9	8441-03-01	C56.9	unknown	unknown	0	2008	TUMOR FREE	12	5	2009	unknown	unknown	No	NA	0	Other	G3	unknown	1-10 mm	unknown	Bilateral	Tumor resection	unknown	unknown	unknown	unknown	unknown	unknown	NO	YES	NO	YES	TCGA-OV	NA	3	Stage IIIC	NA	NA	NA	NA
108	Ovary	Serous Cystadenocarcinoma	FEMALE	Alive	145	WHITE	13	YES	C56.9	8441-03-01	C56.9	unknown	unknown	1	2008	TUMOR FREE	31	3	2009	NOT HISPANIC OR LATINO	unknown	No	60	1	Pre-Adjuvant Therapy	G3	unknown	1-10 mm	unknown	Bilateral	Cytology (e.g. Peritoneal or pleural fluid)	unknown	unknown	unknown	unknown	unknown	unknown	YES	YES	NO	YES	TCGA-OV	NA	3	Stage IIIC	NA	NA	NA	NA
60	Ovary	Serous Cystadenocarcinoma	FEMALE	Alive	257	WHITE	13	YES	C56.9	8441-03-01	C56.9	unknown	unknown	1	2008	TUMOR FREE	24	2	2009	NOT HISPANIC OR LATINO	unknown	No	60	NA	Pre-Adjuvant Therapy	G3	unknown	1-10 mm	unknown	Bilateral	Tumor resection	unknown	unknown	unknown	unknown	unknown	unknown	YES	YES	NO	YES	TCGA-OV	NA	3	Stage IIIC	NA	NA	NA	NA
44	Ovary	Serous Cystadenocarcinoma	FEMALE	Dead	563	WHITE	10	YES	C56.9	8441-03-01	C56.9	unknown	unknown	1	2000	WITH TUMOR	6	3	2009	unknown	unknown	No	NA	0	unknown	G3	unknown	1-10 mm	unknown	Bilateral	Tumor resection	unknown	NO	NO	unknown	unknown	unknown	NO	NO	NO	YES	TCGA-OV	NA	3	Stage IIIC	NA	NA	NA	NA
43	Ovary	Serous Cystadenocarcinoma	FEMALE	Dead	2490	unknown	10	YES	C56.9	8441-03-01	C56.9	unknown	unknown	1	2000	WITH TUMOR	6	3	2009	HISPANIC OR LATINO	unknown	No	NA	NA	unknown	G2	unknown	1-10 mm	unknown	Bilateral	Tumor resection	unknown	unknown	unknown	unknown	unknown	unknown	YES	YES	NO	YES	TCGA-OV	NA	3	Stage IIIC	NA	NA	NA	NA
65	Ovary	Serous Cystadenocarcinoma	FEMALE	Dead	2097	WHITE	13	YES	C56.9	8441-03-01	C56.9	unknown	unknown	1	2002	WITH TUMOR	25	2	2009	NOT HISPANIC OR LATINO	unknown	No	NA	NA	unknown	G3	unknown	1-10 mm	ASHKENAZI	Bilateral	Cytology (e.g. Peritoneal or pleural fluid)	unknown	unknown	unknown	unknown	unknown	unknown	YES	YES	NO	YES	TCGA-OV	NA	3	Stage IIIC	NA	NA	NA	NA
212	Ovary	Serous Cystadenocarcinoma	FEMALE	Dead	1354	WHITE	24	YES	C56.9	8441-03-01	C56.9	unknown	unknown	1	2000	WITH TUMOR	19	2	2010	unknown	unknown	No	NA	NA	unknown	GB	unknown	1-10 mm	unknown	Right	Tumor resection	unknown	unknown	unknown	unknown	unknown	unknown	YES	YES	NO	YES	TCGA-OV	NA	3	Stage IIIA	NA	NA	NA	NA
182	Ovary	Serous Cystadenocarcinoma	FEMALE	Dead	1767	WHITE	24	YES	C56.9	8441-03-01	C56.9	unknown	unknown	0	1997	WITH TUMOR	13	5	2009	unknown	unknown	No	NA	NA	unknown	G3	unknown	1-10 mm	unknown	Bilateral	Tumor resection	unknown	unknown	unknown	unknown	unknown	unknown	YES	YES	NO	YES	TCGA-OV	NA	3	Stage IIIB	NA	NA	NA	NA
21	Ovary	Serous Cystadenocarcinoma	FEMALE	Dead	1380	WHITE	4	YES	C56.9	8441-03-01	C56.9	unknown	unknown	0	1999	unknown	2	6	2009	unknown	unknown	No	NA	0	Pre-Adjuvant Therapy	G2	unknown	No Macroscopic disease	unknown	Bilateral	Cytology (e.g. Peritoneal or pleural fluid)	unknown	unknown	unknown	unknown	unknown	unknown	YES	YES	NO	YES	TCGA-OV	NA	3	Stage IIIB	NA	NA	NA	NA
35	Ovary	Serous Cystadenocarcinoma	FEMALE	Alive	92	WHITE	9	YES	C56.9	8441-03-01	C56.9	unknown	unknown	0	2008	WITH TUMOR	2	6	2009	NOT HISPANIC OR LATINO	unknown	No	NA	NA	unknown	G3	unknown	>20 mm	unknown	Bilateral	Tumor resection	unknown	YES	YES	unknown	unknown	unknown	NO	YES	NO	YES	TCGA-OV	NA	4	Stage IV	NA	NA	NA	NA
299	Ovary	Serous Cystadenocarcinoma	FEMALE	Dead	1103	WHITE	30	YES	C56.9	8441-03-01	C56.9	unknown	unknown	0	2000	WITH TUMOR	2	6	2009	NOT HISPANIC OR LATINO	unknown	No	NA	NA	unknown	G3	unknown	1-10 mm	unknown	Bilateral	Tumor resection	unknown	unknown	NO	unknown	unknown	unknown	YES	YES	NO	YES	TCGA-OV	NA	3	Stage IIIC	NA	NA	NA	NA
339	Ovary	Serous Cystadenocarcinoma	FEMALE	Alive	338	WHITE	61	YES	C56.9	8441-03-01	C56.9	unknown	unknown	0	2008	TUMOR FREE	2	6	2009	NOT HISPANIC OR LATINO	unknown	Yes	NA	NA	unknown	G1	unknown	unknown	unknown	Bilateral	Excisional Biopsy	unknown	YES	YES	unknown	unknown	unknown	NO	YES	NO	YES	TCGA-OV	NA	4	Stage IV	NA	NA	NA	NA
174	Ovary	Serous Cystadenocarcinoma	FEMALE	Alive	36	WHITE	24	YES	C56.9	8441-03-01	C56.9	unknown	unknown	1	2009	unknown	13	5	2009	unknown	unknown	No	NA	NA	unknown	G3	unknown	>20 mm	unknown	Left	Tumor resection	unknown	unknown	YES	unknown	unknown	unknown	NO	YES	NO	YES	TCGA-OV	NA	3	Stage IIIC	NA	NA	NA	NA
[truncated: 9 more columns]

## Sheet: Screening of variables
vital_status	days_to_death	days_to_last_followup	survival_time	race_list	age_at_initial_pathologic_diagnosis(0:<60 years; 1:≧60 years)	neoplasm_histologic_grade	tumor_residual_disease	anatomic_neoplasm_subdivision	venous_invasion	lymphatic_invasion	radiation_therapy	stage_event_clinical_stage	exprSet.ATG4C	exprSet.CAV1
Alive	NA	145	145	WHITE	0	G3	No Macroscopic disease	Bilateral	NO	NO	unknown	Stage IIIC	3.34113	1.96743
Dead	1123	1089	1123	BLACK OR AFRICAN AMERICAN	1	G3	>20 mm	Bilateral	unknown	YES	unknown	Stage IIIC	2.9784	2.59155
Alive	NA	277	277	WHITE	1	G3	1-10 mm	Right	unknown	unknown	unknown	Stage IIIC	3.21013	2.66637
Dead	636	604	636	WHITE	1	G3	>20 mm	Bilateral	unknown	unknown	unknown	Stage IIIC	4.22634	2.77443
Dead	312	312	312	WHITE	1	G3	1-10 mm	Bilateral	unknown	YES	unknown	Stage IIIC	3.16573	2.7932
Dead	820	820	820	BLACK OR AFRICAN AMERICAN	1	G3	1-10 mm	Bilateral	unknown	unknown	unknown	Stage IIIC	3.95251	2.80091
Alive	NA	2237	2237	WHITE	1	G3	unknown	unknown	unknown	unknown	unknown	Stage IIIC	3.72726	3.06714
Dead	949	949	949	WHITE	1	G3	>20 mm	Bilateral	unknown	unknown	unknown	Stage IIIC	3.53293	3.08231
Dead	871	NA	871	WHITE	0	G2	1-10 mm	unknown	unknown	unknown	unknown	Stage IIIC	3.82784	3.20595
Dead	2400	2400	2400	WHITE	0	G2	unknown	Bilateral	YES	unknown	unknown	Stage IIIC	4.12908	3.2317
Alive	NA	247	247	WHITE	0	G3	No Macroscopic disease	Bilateral	unknown	unknown	unknown	Stage IIIC	3.05453	3.32902
Dead	701	NA	701	WHITE	1	G3	1-10 mm	Bilateral	unknown	unknown	unknown	Stage IIIC	3.37263	3.33927
Dead	24	NA	24	BLACK OR AFRICAN AMERICAN	0	GB	>20 mm	Right	unknown	unknown	NO	Stage IV	3.80874	3.34362
Dead	31	31	31	WHITE	1	G3	11-20 mm	Bilateral	unknown	unknown	unknown	Stage IV	3.70863	3.35015
Alive	NA	245	245	BLACK OR AFRICAN AMERICAN	1	G3	unknown	Right	YES	YES	NO	Stage IIIC	3.50485	3.38557
Dead	1000	982	1000	WHITE	0	G3	1-10 mm	Bilateral	NO	unknown	unknown	Stage IIIC	4.46186	3.43972
Alive	NA	1372	1372	WHITE	0	G3	>20 mm	Left	unknown	YES	unknown	Stage IIIC	3.03606	3.44544
Dead	1579	1579	1579	WHITE	0	G3	1-10 mm	Bilateral	unknown	unknown	unknown	Stage IIIC	3.27938	3.47029
Dead	1157	1157	1157	WHITE	1	G3	11-20 mm	Left	unknown	unknown	unknown	Stage IIIC	3.89007	3.48154
Dead	379	379	379	WHITE	1	G3	>20 mm	Left	unknown	YES	unknown	Stage IIIC	4.47916	3.54357
Alive	NA	165	165	ASIAN	0	G3	No Macroscopic disease	Bilateral	NO	NO	unknown	Stage IIIA	4.04685	3.56663
Dead	1348	NA	1348	WHITE	0	G3	1-10 mm	Bilateral	unknown	unknown	unknown	Stage IIC	3.58516	3.59624
Alive	NA	116	116	WHITE	0	G3	1-10 mm	Bilateral	unknown	unknown	unknown	Stage IIIC	3.92915	3.60844
Alive	NA	763	763	WHITE	0	G3	No Macroscopic disease	Bilateral	YES	YES	unknown	Stage IIIC	2.9406	3.63543
Dead	524	524	524	WHITE	0	G3	1-10 mm	Bilateral	unknown	unknown	unknown	Stage IIIB	4.17647	3.64104
Alive	NA	679	679	WHITE	1	G3	11-20 mm	Bilateral	YES	YES	unknown	Stage IIIC	3.511	3.71476
Dead	286	NA	286	WHITE	1	G3	unknown	Right	unknown	unknown	unknown	Stage IIIC	3.50167	3.72483
Alive	NA	195	195	WHITE	1	G3	No Macroscopic disease	Right	unknown	unknown	unknown	Stage IIIC	3.19884	3.73425
Alive	NA	643	643	WHITE	0	G3	1-10 mm	Bilateral	YES	YES	unknown	Stage IIIC	3.89726	3.7381
Dead	594	594	594	WHITE	1	G3	1-10 mm	Bilateral	unknown	unknown	unknown	Stage IIIC	3.42905	3.75368
Dead	1018	NA	1018	WHITE	0	G3	11-20 mm	Left	unknown	YES	unknown	Stage IIIC	4.09102	3.75881
Alive	NA	1277	1277	WHITE	0	G3	No Macroscopic disease	Left	unknown	NO	unknown	Stage IIC	3.55785	3.7595
Dead	1815	1815	1815	BLACK OR AFRICAN AMERICAN	0	G2	1-10 mm	Bilateral	unknown	unknown	unknown	Stage IIIC	3.66545	3.79781
Dead	949	946	949	WHITE	0	GX	1-10 mm	Bilateral	unknown	unknown	unknown	Stage IIIC	3.79523	3.81298
Dead	624	NA	624	BLACK OR AFRICAN AMERICAN	0	Preoperative	unknown	unknown	unknown	YES	YES	NA	3.33832	3.82239
Alive	NA	1993	1993	WHITE	1	G2	11-20 mm	Bilateral	NO	unknown	unknown	Stage IIIC	3.22393	3.83594
Alive	NA	1573	1573	WHITE	0	G3	No Macroscopic disease	Bilateral	NO	NO	unknown	Stage IIIC	4.92068	3.86637
Dead	138	NA	138	WHITE	1	G3	1-10 mm	Bilateral	YES	YES	unknown	Stage IIIC	4.32396	3.86956
Alive	NA	1498	1498	WHITE	1	G2	1-10 mm	Bilateral	unknown	unknown	unknown	Stage IIIC	5.25653	3.90477
Dead	1089	1089	1089	BLACK OR AFRICAN AMERICAN	1	G3	1-10 mm	Right	YES	YES	unknown	Stage IIIC	3.81185	3.92073
Dead	1091	1081	1091	WHITE	1	G3	No Macroscopic disease	Bilateral	unknown	unknown	unknown	Stage IIIC	4.11407	3.92416
Alive	NA	932	932	ASIAN	0	G2	No Macroscopic disease	Bilateral	YES	YES	unknown	Stage IIC	2.58691	3.93983
Alive	NA	379	379	WHITE	1	G3	No Macroscopic disease	Bilateral	NO	NO	unknown	Stage IIIC	4.32145	3.94354
Dead	1364	1364	1364	WHITE	0	G3	1-10 mm	Bilateral	unknown	unknown	unknown	Stage IIIA	3.25237	3.95138
Dead	462	462	462	WHITE	1	G3	1-10 mm	Bilateral	unknown	unknown	unknown	Stage IIIC	3.39753	3.95494
Alive	NA	527	527	WHITE	1	G3	>20 mm	Bilateral	unknown	unknown	unknown	Stage IIIC	3.52233	3.95775
Alive	NA	168	168	WHITE	1	G3	1-10 mm	Bilateral	unknown	YES	unknown	Stage IIIC	2.69707	3.95944
Dead	1102	NA	1102	WHITE	0	G3	1-10 mm	Bilateral	unknown	unknown	unknown	Stage IIIC	3.63665	3.97092
Dead	695	695	695	WHITE	0	G3	No Macroscopic disease	Bilateral	NO	NO	unknown	Stage IIIB	4.2981	3.98402
Alive	NA	869	869	WHITE	0	G3	1-10 mm	Bilateral	unknown	unknown	unknown	Stage IIIC	3.0424	3.98659
Alive	NA	797	797	WHITE	1	G3	No Macroscopic disease	Right	unknown	unknown	unknown	Stage IIB	2.8718	4.00973
Alive	NA	3825	3825	WHITE	1	G3	unknown	Left	unknown	unknown	unknown	Stage IV	3.13681	4.03785
Alive	NA	1919	1919	WHITE	0	G3	No Macroscopic disease	Bilateral	YES	YES	unknown	Stage IIIC	3.89242	4.04099
Alive	NA	184	184	WHITE	0	G3	unknown	Bilateral	unknown	unknown	unknown	Stage IIIC	3.42145	4.04952
Alive	NA	947	947	WHITE	1	G3	unknown	Left	unknown	NO	unknown	Stage IIIB	3.63123	4.05274
Alive	NA	133	133	unknown	0	G3	1-10 mm	Bilateral	unknown	YES	unknown	Stage IIIC	3.79739	4.08186
Alive	NA	192	192	WHITE	0	G3	1-10 mm	Bilateral	unknown	YES	unknown	Stage IIIC	3.32827	4.08822
Alive	NA	1357	1357	WHITE	1	G3	1-10 mm	Bilateral	unknown	YES	unknown	Stage IIA	2.47263	4.09087
Dead	2634	2606	2634	WHITE	0	G2	>20 mm	Bilateral	unknown	unknown	unknown	Stage IV	3.86976	4.09582
Alive	NA	1882	1882	WHITE	1	G2	No Macroscopic disease	Bilateral	NO	NO	unknown	Stage IIC	3.91849	4.11115
Dead	3260	3260	3260	WHITE	0	G3	1-10 mm	Bilateral	unknown	unknown	unknown	Stage IIIC	3.36796	4.12654
Alive	NA	468	468	WHITE	0	G3	1-10 mm	Right	unknown	unknown	unknown	Stage IV	3.28077	4.12746
Dead	887	NA	887	WHITE	1	G3	11-20 mm	Right	NO	NO	unknown	Stage IIC	2.724	4.12982
Dead	1319	1319	1319	BLACK OR AFRICAN AMERICAN	0	G3	11-20 mm	Bilateral	unknown	unknown	unknown	Stage IIIC	4.22275	4.13392
Alive	NA	163	163	WHITE	0	G3	1-10 mm	Bilateral	unknown	YES	unknown	Stage IIIC	3.91523	4.13398
Alive	NA	190	190	BLACK OR AFRICAN AMERICAN	1	G3	No Macroscopic disease	Left	NO	NO	unknown	Stage IIA	4.20491	4.13454
Alive	NA	134	134	WHITE	0	G3	unknown	Bilateral	unknown	unknown	unknown	Stage IIIC	3.85791	4.13758
Dead	1947	1947	1947	WHITE	0	G3	1-10 mm	unknown	unknown	unknown	unknown	Stage IIIA	3.3341	4.15214
Alive	NA	232	232	BLACK OR AFRICAN AMERICAN	1	G3	>20 mm	Bilateral	unknown	YES	unknown	Stage IIIC	2.96203	4.15962
Dead	730	549	730	WHITE	1	G3	1-10 mm	Left	unknown	unknown	unknown	Stage IIIC	3.93902	4.18152
Alive	NA	751	751	WHITE	1	G3	No Macroscopic disease	Left	unknown	unknown	unknown	Stage IIC	3.82197	4.20354
Dead	377	377	377	WHITE	0	G3	1-10 mm	Bilateral	unknown	unknown	unknown	Stage IIIC	4.10748	4.20827
Dead	1799	1732	1799	WHITE	1	G3	1-10 mm	Bilateral	unknown	unknown	unknown	Stage IV	3.303	4.21203
Dead	83	83	83	WHITE	1	G3	1-10 mm	Right	unknown	unknown	unknown	Stage IV	3.58004	4.21604
Alive	NA	5481	5481	WHITE	0	G3	unknown	Bilateral	unknown	unknown	unknown	Stage IIIC	2.05429	4.22388
Alive	NA	571	571	WHITE	1	G2	1-10 mm	Bilateral	NO	NO	unknown	Stage IIIC	3.69769	4.22995
Alive	NA	441	441	WHITE	1	G3	No Macroscopic disease	Bilateral	YES	YES	unknown	Stage IIIC	3.42058	4.23026
Alive	NA	761	761	WHITE	1	unknown	unknown	unknown	unknown	unknown	unknown	unknown	3.34765	4.24559
Alive	NA	119	119	ASIAN	0	G3	>20 mm	Bilateral	unknown	unknown	unknown	Stage IV	3.32765	4.25128
Alive	NA	875	875	unknown	0	G3	unknown	Bilateral	unknown	NO	unknown	Stage IIIC	3.5987	4.25445
Alive	NA	277	277	BLACK OR AFRICAN AMERICAN	1	Post-Adjuvant Therapy	R0	unknown	unknown	NO	NO	NA	3.47615	4.27314
Alive	NA	1209	1209	WHITE	1	G3	No Macroscopic disease	Left	NO	NO	unknown	Stage IIIC	3.09131	4.30668
Alive	NA	1900	1900	WHITE	1	G3	>20 mm	Left	unknown	unknown	unknown	Stage IIIC	4.02784	4.33039
Dead	1162	239	1162	WHITE	1	G3	1-10 mm	Bilateral	unknown	unknown	unknown	Stage IIIC	3.69321	4.33739
Dead	1024	1024	1024	WHITE	1	G3	>20 mm	Bilateral	NO	unknown	unknown	Stage IIIB	3.64407	4.34481
Alive	NA	655	655	WHITE	0	G3	>20 mm	Bilateral	YES	YES	unknown	Stage IIIC	3.811	4.36367
Alive	NA	1293	1293	WHITE	0	G3	unknown	Left	YES	YES	unknown	Stage IIA	3.56223	4.36528
Dead	1104	1053	1104	WHITE	0	G3	>20 mm	Right	unknown	YES	unknown	Stage IIIC	4.11839	4.38041
Dead	1341	1341	1341	WHITE	0	G4	1-10 mm	Left	unknown	unknown	unknown	Stage IIIC	4.06839	4.3807
Dead	1024	NA	1024	WHITE	1	G3	1-10 mm	Bilateral	unknown	NO	unknown	Stage IIIC	3.62615	4.38121
Alive	NA	163	163	WHITE	0	G3	No Macroscopic disease	Right	unknown	YES	unknown	Stage IIIC	4.54936	4.38907
Dead	731	731	731	WHITE	0	G3	1-10 mm	Left	YES	YES	unknown	Stage IIIC	3.89487	4.39185
Dead	1721	1721	1721	WHITE	0	G3	unknown	Bilateral	unknown	unknown	unknown	Stage IIIB	3.35737	4.39444
Dead	919	919	919	WHITE	1	G3	1-10 mm	Bilateral	unknown	YES	unknown	Stage IIIC	4.02093	4.40223
Dead	9	NA	9	WHITE	0	G3	>20 mm	Left	unknown	unknown	unknown	Stage IV	3.24369	4.41647
Dead	821	821	821	WHITE	1	G3	1-10 mm	Bilateral	unknown	unknown	unknown	Stage IV	3.13316	4.42014
Alive	NA	2141	2141	WHITE	1	G3	No Macroscopic disease	Right	unknown	unknown	unknown	Stage IIIC	3.79822	4.42528
Dead	3224	3224	3224	WHITE	0	G3	1-10 mm	Right	unknown	YES	unknown	Stage IIIC	2.76272	4.43312
Dead	2049	2049	2049	WHITE	1	G3	>20 mm	Bilateral	unknown	unknown	unknown	Stage IV	3.64996	4.43702
Dead	1088	NA	1088	BLACK OR AFRICAN AMERICAN	1	G3	unknown	unknown	unknown	unknown	NO	Stage IIIC	3.84846	4.43894
Alive	NA	1748	1748	WHITE	0	G3	1-10 mm	Right	unknown	unknown	unknown	Stage IIIC	3.42647	4.44809
Dead	676	676	676	BLACK OR AFRICAN AMERICAN	0	G3	1-10 mm	Left	unknown	unknown	unknown	Stage IIIC	4.49838	4.4496
Dead	455	455	455	WHITE	0	G3	11-20 mm	Bilateral	unknown	unknown	unknown	Stage IIIC	3.4287	4.45745
Dead	92	92	92	WHITE	1	G3	No Macroscopic disease	Bilateral	unknown	unknown	unknown	Stage IIIC	3.40053	4.4585
Dead	1336	1224	1336	WHITE	1	G3	1-10 mm	Bilateral	NO	YES	unknown	Stage IIIC	3.92147	4.47274
Dead	1189	NA	1189	WHITE	0	G3	1-10 mm	Left	unknown	NO	unknown	Stage IIIC	3.14813	4.48266
Dead	1688	NA	1688	WHITE	0	G2	11-20 mm	Bilateral	unknown	unknown	unknown	Stage IIIC	2.80289	4.48989
Dead	1446	1446	1446	WHITE	0	G3	>20 mm	Right	YES	YES	unknown	Stage IV	3.72039	4.49085
Dead	1213	1213	1213	WHITE	0	G3	>20 mm	Bilateral	unknown	unknown	unknown	Stage IIIC	3.36188	4.49593
Alive	NA	1722	1722	unknown	1	G3	>20 mm	Bilateral	YES	YES	unknown	Stage IIIC	4.77444	4.49661
Alive	NA	981	981	WHITE	1	G3	No Macroscopic disease	Bilateral	unknown	unknown	unknown	Stage IIIC	2.50502	4.49967
Dead	2028	2028	2028	WHITE	0	G3	1-10 mm	Bilateral	unknown	unknown	unknown	Stage IIIC	3.78051	4.50615
Alive	NA	143	143	WHITE	0	GX	unknown	Bilateral	unknown	unknown	unknown	Stage IV	3.11653	4.50833
Dead	395	365	395	WHITE	1	G3	1-10 mm	Bilateral	unknown	unknown	unknown	Stage IIIC	3.29661	4.50937
Dead	4624	4624	4624	WHITE	1	G3	1-10 mm	Bilateral	unknown	unknown	unknown	Stage IIIC	1.92865	4.52411
Alive	NA	952	952	WHITE	1	G3	11-20 mm	Bilateral	YES	unknown	unknown	Stage IIIC	3.688	4.52589
Dead	24	24	24	WHITE	1	G3	11-20 mm	Left	unknown	YES	unknown	Stage IIIC	3.85378	4.55453
Alive	NA	238	238	WHITE	0	G3	1-10 mm	Left	unknown	unknown	unknown	Stage IV	4.21324	4.55524
Dead	1977	1977	1977	WHITE	1	G3	11-20 mm	Bilateral	unknown	unknown	unknown	Stage IIIC	4.14849	4.55722
Dead	1442	1442	1442	WHITE	0	G3	1-10 mm	Bilateral	unknown	unknown	unknown	Stage IIIC	3.45043	4.57499
Alive	NA	1844	1844	WHITE	1	G2	1-10 mm	Bilateral	YES	YES	unknown	Stage IIC	3.60289	4.57789
Dead	354	354	354	WHITE	1	G3	>20 mm	Bilateral	unknown	YES	unknown	Stage IIIC	2.914	4.58118
Alive	NA	2616	2616	WHITE	0	G3	>20 mm	Left	YES	YES	unknown	Stage IIIC	4.00401	4.59164
Dead	1583	1553	1583	WHITE	0	G3	1-10 mm	Bilateral	unknown	unknown	unknown	Stage IIIC	4.02542	4.60184
Alive	NA	547	547	WHITE	0	G3	No Macroscopic disease	Bilateral	NO	NO	unknown	Stage IIIA	4.4395	4.60607
Alive	NA	78	78	WHITE	1	G3	No Macroscopic disease	Left	unknown	unknown	unknown	Stage IIIC	3.97586	4.61121
Dead	679	NA	679	unknown	0	G3	1-10 mm	Bilateral	unknown	unknown	unknown	Stage IV	3.85376	4.61368
Alive	NA	106	106	WHITE	1	G3	1-10 mm	Right	unknown	YES	unknown	Stage IIIC	3.65505	4.61589
Dead	1720	NA	1720	WHITE	0	G2	No Macroscopic disease	Bilateral	unknown	NO	unknown	Stage IIIA	3.45647	4.6159
Dead	9	9	9	WHITE	1	G3	1-10 mm	Bilateral	unknown	unknown	unknown	Stage IIIC	4.03768	4.62971
Dead	608	608	608	WHITE	1	G3	>20 mm	Bilateral	unknown	unknown	unknown	Stage IIIC	3.41996	4.63352
Alive	NA	848	848	WHITE	0	G3	1-10 mm	Bilateral	NO	NO	unknown	Stage IV	3.6032	4.63602
Alive	NA	3953	3953	WHITE	1	G3	1-10 mm	Left	YES	YES	unknown	Stage IIIC	3.55509	4.63707
Alive	NA	343	343	WHITE	0	G3	1-10 mm	Bilateral	unknown	YES	unknown	Stage IV	3.27941	4.64463
Alive	NA	1053	1053	BLACK OR AFRICAN AMERICAN	0	G2	No Macroscopic disease	Bilateral	unknown	unknown	unknown	Stage IIIC	3.62051	4.64954
Dead	129	129	129	WHITE	1	G3	>20 mm	Bilateral	unknown	unknown	unknown	Stage IIIC	3.99553	4.65932
Dead	1583	1558	1583	WHITE	1	G3	1-10 mm	Bilateral	unknown	unknown	unknown	Stage IIIC	4.10686	4.67222
Dead	1073	1073	1073	WHITE	1	G3	1-10 mm	Bilateral	unknown	unknown	unknown	Stage IIIC	3.52673	4.67287
Dead	1355	1355	1355	WHITE	0	G3	1-10 mm	Bilateral	unknown	unknown	unknown	Stage IIIC	3.43966	4.67726
Dead	1266	NA	1266	WHITE	1	G2	No Macroscopic disease	Left	YES	YES	unknown	Stage IIIC	3.13024	4.68338
Alive	NA	190	190	WHITE	1	G3	1-10 mm	Bilateral	unknown	YES	unknown	Stage IIIC	0.793477	4.70489
Alive	NA	331	331	WHITE	0	G3	unknown	Left	unknown	unknown	unknown	Stage IIIC	3.12727	4.70751
Alive	NA	420	420	WHITE	1	G3	1-10 mm	Bilateral	unknown	unknown	unknown	Stage IIIC	4.04379	4.72713
Alive	NA	130	130	WHITE	1	G3	1-10 mm	Right	NO	NO	unknown	Stage IIIC	3.56008	4.73023
Dead	3337	3337	3337	WHITE	0	G3	>20 mm	Bilateral	unknown	unknown	unknown	Stage IV	3.72211	4.73582
Alive	NA	912	912	WHITE	0	G3	No Macroscopic disease	Bilateral	unknown	unknown	unknown	Stage IIIC	4.09624	4.73651
Dead	1492	1492	1492	WHITE	0	G3	>20 mm	Bilateral	unknown	unknown	unknown	Stage IIIC	4.03245	4.74041
Dead	186	186	186	WHITE	1	G2	>20 mm	unknown	unknown	NO	unknown	Stage IV	3.84824	4.74373
Alive	NA	98	98	WHITE	1	G3	>20 mm	Right	unknown	YES	unknown	Stage IIIC	3.0709	4.75656
Dead	304	NA	304	WHITE	0	G3	>20 mm	Bilateral	NO	YES	unknown	Stage IIIC	3.42193	4.76479
Dead	2154	2154	2154	WHITE	0	G3	11-20 mm	Bilateral	unknown	unknown	unknown	Stage IV	3.23206	4.77619
Dead	608	460	608	WHITE	0	G3	1-10 mm	Bilateral	unknown	unknown	unknown	Stage IIIC	3.70527	4.78594
Alive	NA	772	772	WHITE	1	G3	No Macroscopic disease	Right	unknown	unknown	unknown	Stage IIIC	4.38675	4.79066
Alive	NA	94	94	WHITE	0	G3	No Macroscopic disease	Bilateral	unknown	unknown	unknown	Stage IIIC	3.91012	4.79402
Alive	NA	185	185	WHITE	0	G3	1-10 mm	Bilateral	unknown	unknown	unknown	Stage IV	3.82071	4.81481
Dead	1516	NA	1516	WHITE	0	G3	No Macroscopic disease	Right	YES	YES	unknown	Stage IV	4.16055	4.81516
Alive	NA	596	596	WHITE	1	G3	>20 mm	Bilateral	unknown	unknown	unknown	Stage IIIC	4.30851	4.82518
Dead	479	479	479	WHITE	0	G3	No Macroscopic disease	Bilateral	YES	unknown	unknown	Stage IV	3.32591	4.82581
Dead	1769	1769	1769	BLACK OR AFRICAN AMERICAN	1	G3	1-10 mm	Bilateral	unknown	unknown	unknown	Stage IIIC	3.1376	4.83146
Dead	637	637	637	BLACK OR AFRICAN AMERICAN	0	G3	1-10 mm	Bilateral	YES	YES	unknown	Stage IIIC	3.54912	4.83186
Dead	2688	2688	2688	WHITE	1	G3	unknown	Bilateral	unknown	unknown	unknown	Stage IIIC	3.21484	4.83289
Dead	1499	NA	1499	WHITE	1	G3	unknown	Bilateral	YES	YES	unknown	Stage IIC	3.02895	4.83371
Dead	189	189	189	WHITE	0	G3	1-10 mm	Bilateral	unknown	unknown	unknown	Stage IV	2.68145	4.83529
Dead	820	820	820	WHITE	1	G3	1-10 mm	Bilateral	unknown	unknown	unknown	Stage IV	3.66745	4.8561
Alive	NA	33	33	WHITE	1	G3	unknown	unknown	unknown	unknown	unknown	unknown	3.04935	4.86733
Dead	1069	NA	1069	ASIAN	0	G2	1-10 mm	Bilateral	YES	YES	unknown	Stage IV	3.31522	4.86902
Dead	91	91	91	WHITE	1	G3	>20 mm	Bilateral	unknown	unknown	unknown	Stage IV	3.75105	4.88359
Dead	562	562	562	WHITE	1	G3	>20 mm	Bilateral	unknown	unknown	unknown	Stage IIIC	3.17119	4.88743
Dead	1757	NA	1757	WHITE	0	G3	1-10 mm	Bilateral	NO	NO	unknown	Stage IIIC	4.04778	4.88773
Dead	457	90	457	WHITE	1	G3	11-20 mm	Bilateral	unknown	unknown	unknown	Stage IIIC	3.80188	4.88821
Dead	2089	2089	2089	WHITE	0	G3	No Macroscopic disease	Left	unknown	unknown	unknown	Stage IIIC	3.04609	4.89407
Dead	394	11	394	WHITE	1	G3	1-10 mm	Bilateral	unknown	unknown	unknown	Stage IIIC	4.07803	4.90299
Dead	31	31	31	WHITE	1	G3	1-10 mm	Left	unknown	unknown	unknown	Stage IV	3.81882	4.90448
Alive	NA	105	105	WHITE	0	G3	1-10 mm	Bilateral	unknown	unknown	unknown	Stage IIIB	3.5434	4.90812
Dead	346	346	346	BLACK OR AFRICAN AMERICAN	0	G3	No Macroscopic disease	Left	NO	NO	unknown	Stage IIIC	3.24098	4.91263
Dead	3622	NA	3622	WHITE	1	G3	1-10 mm	Bilateral	NO	NO	unknown	Stage IIIC	3.26977	4.9165
Dead	542	NA	542	WHITE	1	G3	>20 mm	Bilateral	unknown	unknown	unknown	Stage IIIC	3.49267	4.94906
Alive	NA	684	684	WHITE	0	G3	No Macroscopic disease	Left	YES	YES	unknown	Stage IIIC	3.20502	4.95378
Dead	528	517	528	ASIAN	1	G3	>20 mm	Bilateral	unknown	unknown	unknown	Stage IIIC	4.40487	4.96638
Dead	1699	1699	1699	WHITE	0	G3	>20 mm	Bilateral	unknown	unknown	unknown	Stage IIIC	3.35236	4.96731
Dead	1229	NA	1229	WHITE	1	G2	>20 mm	Left	unknown	unknown	unknown	Stage IIIC	3.3197	4.97534
Dead	1187	NA	1187	WHITE	0	GX	11-20 mm	Bilateral	unknown	unknown	unknown	Stage IIIC	3.38227	4.9844
Alive	NA	268	268	WHITE	0	G3	1-10 mm	Right	unknown	unknown	unknown	Stage IIIC	4.06514	4.98708
Alive	NA	113	113	WHITE	1	G3	1-10 mm	Bilateral	unknown	unknown	unknown	Stage IIIC	3.7862	4.99258
Dead	1448	1360	1448	WHITE	1	G2	11-20 mm	Bilateral	unknown	unknown	unknown	Stage IIIC	3.30144	4.99359
Alive	NA	885	885	WHITE	0	G3	1-10 mm	Bilateral	unknown	YES	unknown	Stage IIIC	3.81524	4.99472
Alive	NA	243	243	WHITE	1	G3	>20 mm	Bilateral	unknown	unknown	unknown	Stage IIIC	3.66445	5.00245
Dead	1032	1025	1032	WHITE	0	G2	1-10 mm	Right	unknown	NO	unknown	Stage IIIC	4.4642	5.00392
Alive	NA	1455	1455	WHITE	0	G3	unknown	Left	unknown	unknown	unknown	Stage IIIC	2.90252	5.00868
Alive	NA	201	201	WHITE	0	G3	1-10 mm	Bilateral	unknown	unknown	unknown	Stage IIIC	3.6713	5.01722
Dead	1562	1562	1562	WHITE	1	G3	1-10 mm	Right	unknown	unknown	unknown	Stage IIIC	3.358	5.01963
Alive	NA	918	918	unknown	0	G3	No Macroscopic disease	Bilateral	YES	NO	unknown	Stage IIIC	3.51915	5.02496
Dead	1249	945	1249	WHITE	1	G3	1-10 mm	Bilateral	unknown	unknown	unknown	Stage IIIC	3.99955	5.03044
Dead	1161	1161	1161	WHITE	0	G2	unknown	Bilateral	unknown	unknown	unknown	Stage IIIC	3.65519	5.03343
Dead	676	676	676	WHITE	0	G3	unknown	Right	YES	YES	unknown	Stage IIC	3.65209	5.04017
Alive	NA	837	837	WHITE	0	GX	11-20 mm	Bilateral	YES	YES	unknown	Stage IIIC	4.10582	5.04162
Dead	2621	2621	2621	WHITE	1	G2	11-20 mm	Left	NO	unknown	unknown	Stage IIIC	3.09587	5.04683
Dead	962	962	962	ASIAN	0	G3	>20 mm	Bilateral	YES	YES	unknown	Stage IIIC	3.65346	5.04695
Alive	NA	1127	1127	WHITE	0	G3	1-10 mm	Bilateral	YES	YES	unknown	Stage IIC	3.24197	5.05796
Alive	NA	255	255	WHITE	1	G3	No Macroscopic disease	Bilateral	unknown	unknown	unknown	Stage IIIC	3.71592	5.06382
Alive	NA	843	843	WHITE	0	G3	1-10 mm	Bilateral	unknown	unknown	unknown	Stage IV	3.10386	5.07417
Alive	NA	644	644	WHITE	0	G3	No Macroscopic disease	Bilateral	unknown	unknown	unknown	Stage IIIC	3.98222	5.0908
Dead	1158	1158	1158	WHITE	1	G3	1-10 mm	Bilateral	NO	YES	unknown	Stage IV	3.26928	5.11197
Alive	NA	1212	1212	WHITE	1	G3	11-20 mm	Bilateral	YES	YES	unknown	Stage IIIC	4.03002	5.13844
Alive	NA	3525	3525	WHITE	0	G3	No Macroscopic disease	Left	YES	NO	unknown	Stage IIIC	3.64098	5.13991
Alive	NA	67	67	WHITE	0	G2	unknown	Bilateral	YES	YES	unknown	Stage IV	4.21504	5.1539
Dead	1646	1646	1646	BLACK OR AFRICAN AMERICAN	0	G3	1-10 mm	Bilateral	unknown	unknown	unknown	Stage IIIC	2.79182	5.16204
Dead	1163	1163	1163	WHITE	0	G3	1-10 mm	Bilateral	unknown	unknown	unknown	Stage IIIC	3.98564	5.18095
Alive	NA	1296	1296	BLACK OR AFRICAN AMERICAN	1	G3	No Macroscopic disease	Bilateral	unknown	unknown	NO	Stage IIIC	3.72887	5.1822
Alive	NA	127	127	WHITE	1	G3	1-10 mm	Bilateral	unknown	unknown	unknown	Stage IV	4.27653	5.18654
Dead	515	514	515	WHITE	0	G3	unknown	Bilateral	YES	YES	unknown	Stage IIIC	4.07864	5.19327
Dead	1366	1366	1366	WHITE	0	G3	>20 mm	Bilateral	NO	NO	unknown	Stage IIIC	4.69979	5.1994
Dead	197	197	197	WHITE	1	G3	unknown	Right	unknown	unknown	unknown	Stage IIIC	3.55004	5.20011
Dead	555	555	555	WHITE	0	G2	>20 mm	Bilateral	unknown	unknown	unknown	Stage IIIC	3.91457	5.21314
Alive	NA	1364	1364	WHITE	0	G3	1-10 mm	Bilateral	unknown	unknown	unknown	Stage IV	2.99096	5.21327
Alive	NA	128	128	WHITE	1	G3	1-10 mm	Bilateral	unknown	unknown	unknown	Stage IIIC	3.46975	5.21346
Alive	NA	1367	1367	WHITE	0	G3	1-10 mm	Bilateral	unknown	unknown	unknown	Stage IIIC	4.13399	5.21358
Dead	1064	1064	1064	WHITE	0	G3	1-10 mm	Bilateral	unknown	unknown	unknown	Stage IIIC	3.92834	5.21548
Dead	61	NA	61	WHITE	1	G3	unknown	Bilateral	unknown	unknown	unknown	Stage IIIC	2.78434	5.21623
Alive	NA	956	956	WHITE	0	G3	11-20 mm	Bilateral	YES	YES	unknown	Stage IIIC	4.24731	5.21989
Dead	2742	2742	2742	WHITE	0	G3	unknown	Bilateral	unknown	unknown	unknown	Stage IIIB	3.8707	5.23228
Alive	NA	932	932	WHITE	1	G2	unknown	Left	YES	YES	unknown	Stage IIC	3.40415	5.23963
Dead	2467	2467	2467	WHITE	0	G3	1-10 mm	Bilateral	unknown	unknown	unknown	Stage IIIC	3.83363	5.25586
Dead	1259	1259	1259	WHITE	1	G3	1-10 mm	Left	unknown	YES	unknown	Stage IIIC	3.82364	5.25672
Alive	NA	816	816	WHITE	0	G3	1-10 mm	Left	unknown	unknown	unknown	Stage IIIC	3.52357	5.26036
Alive	NA	176	176	BLACK OR AFRICAN AMERICAN	0	G3	No Macroscopic disease	Bilateral	NO	NO	unknown	Stage IIIB	3.43299	5.26918
Alive	NA	194	194	WHITE	0	G3	1-10 mm	Bilateral	unknown	unknown	unknown	Stage IV	3.77859	5.2746
Dead	1199	1190	1199	WHITE	1	G2	11-20 mm	Right	unknown	unknown	unknown	Stage IIIC	3.58651	5.28419
Dead	637	637	637	WHITE	0	G3	No Macroscopic disease	Bilateral	YES	YES	unknown	Stage IIIC	3.87906	5.28955
Dead	11	11	11	WHITE	0	G3	1-10 mm	Right	unknown	unknown	unknown	Stage IIIC	3.48948	5.29378
Dead	1046	NA	1046	WHITE	1	G3	1-10 mm	Left	unknown	YES	unknown	Stage IIIC	3.66869	5.29453
Alive	NA	2338	2338	WHITE	0	G2	No Macroscopic disease	Bilateral	NO	unknown	unknown	Stage IIC	3.87866	5.32059
Dead	681	681	681	WHITE	1	GX	unknown	unknown	unknown	unknown	unknown	Stage IV	3.55039	5.32282
Alive	NA	89	89	WHITE	1	G3	No Macroscopic disease	Bilateral	unknown	NO	unknown	Stage IIIC	3.92076	5.33008
Alive	NA	999	999	WHITE	0	G3	>20 mm	Bilateral	unknown	unknown	unknown	Stage IV	3.37546	5.33255
Dead	1955	1955	1955	WHITE	0	G3	1-10 mm	Bilateral	unknown	unknown	unknown	Stage IIIC	3.5132	5.33399
Dead	1059	1059	1059	WHITE	1	G3	>20 mm	Bilateral	unknown	YES	unknown	Stage IIIC	3.61565	5.35006
Dead	1278	1278	1278	WHITE	1	G3	No Macroscopic disease	Bilateral	unknown	unknown	unknown	Stage IIIC	3.53578	5.3501
Dead	1579	1579	1579	WHITE	0	G3	1-10 mm	Bilateral	NO	NO	unknown	Stage IIIC	4.05714	5.35055
Dead	1169	NA	1169	WHITE	1	G3	1-10 mm	Right	NO	NO	unknown	Stage IIIC	3.74345	5.35103
Alive	NA	686	686	ASIAN	0	G3	>20 mm	Bilateral	unknown	unknown	unknown	Stage IIIC	4.06397	5.35195
Dead	951	889	951	WHITE	0	G2	1-10 mm	Bilateral	unknown	unknown	unknown	Stage IIIC	4.0309	5.36371
Alive	NA	2259	2259	WHITE	1	G3	1-10 mm	Bilateral	unknown	unknown	unknown	Stage IIIC	3.49604	5.36574
Alive	NA	1386	1386	WHITE	0	G3	No Macroscopic disease	Bilateral	YES	YES	unknown	Stage IIIC	3.13876	5.37547
Dead	1324	1324	1324	WHITE	0	G3	1-10 mm	Bilateral	unknown	NO	unknown	Stage IIIC	4.6248	5.37702
Alive	NA	239	239	WHITE	1	G3	11-20 mm	Bilateral	unknown	unknown	unknown	Stage IIIC	3.9508	5.38389
Alive	NA	204	204	ASIAN	0	G3	unknown	Bilateral	NO	NO	unknown	Stage IIIC	3.8687	5.39142
Dead	1446	1446	1446	WHITE	0	G3	No Macroscopic disease	Bilateral	unknown	YES	unknown	Stage IIB	3.7345	5.4014
Alive	NA	1652	1652	WHITE	0	G3	unknown	unknown	unknown	unknown	unknown	Stage IIIC	3.65815	5.40412
Dead	1369	1369	1369	WHITE	1	G3	1-10 mm	Bilateral	unknown	unknown	unknown	Stage IIIC	2.82943	5.42677
Dead	883	883	883	AMERICAN INDIAN OR ALASKA NATIVE	0	G3	No Macroscopic disease	Bilateral	unknown	unknown	unknown	Stage IIIC	3.36564	5.42945
Alive	NA	16	16	WHITE	1	G3	1-10 mm	Right	NO	NO	unknown	Stage IIC	2.72368	5.44691
Dead	1470	1435	1470	WHITE	0	G2	1-10 mm	Bilateral	unknown	unknown	unknown	Stage IIIC	3.64523	5.45004
Dead	1620	1620	1620	WHITE	0	G3	>20 mm	Bilateral	unknown	unknown	unknown	Stage IIIC	3.09875	5.46309
Alive	NA	1919	1919	WHITE	1	G3	No Macroscopic disease	Bilateral	NO	NO	unknown	Stage IV	4.36474	5.46398
Alive	NA	168	168	WHITE	0	G3	1-10 mm	Bilateral	YES	YES	unknown	Stage IIIC	3.54449	5.4697
Alive	NA	2032	2032	BLACK OR AFRICAN AMERICAN	0	G2	1-10 mm	Bilateral	unknown	unknown	unknown	Stage IIC	3.56111	5.47176
Dead	446	356	446	WHITE	1	G3	No Macroscopic disease	Bilateral	unknown	unknown	unknown	Stage IIIC	3.30903	5.48136
Alive	NA	128	128	WHITE	1	G3	>20 mm	unknown	unknown	unknown	unknown	Stage IIIC	3.19724	5.48529
Alive	NA	180	180	WHITE	0	G3	>20 mm	unknown	unknown	unknown	unknown	Stage IIIC	3.5885	5.48696
Alive	NA	3532	3532	WHITE	0	G3	1-10 mm	Bilateral	unknown	unknown	unknown	Stage IIIC	3.8334	5.48984
Dead	53	53	53	WHITE	0	G3	11-20 mm	Bilateral	YES	YES	unknown	Stage IIIC	3.3621	5.49396
Alive	NA	2099	2099	WHITE	1	G3	No Macroscopic disease	Bilateral	unknown	unknown	unknown	Stage IV	3.2534	5.51402
Dead	336	336	336	WHITE	1	G3	11-20 mm	Bilateral	unknown	unknown	unknown	Stage IIIC	4.05524	5.51886
Dead	1155	1124	1155	WHITE	1	G3	1-10 mm	Bilateral	unknown	unknown	unknown	Stage IIIC	3.34596	5.54397
Alive	NA	224	224	WHITE	0	G3	1-10 mm	Bilateral	unknown	unknown	unknown	Stage IV	3.37635	5.54773
Dead	679	679	679	WHITE	1	G3	1-10 mm	Bilateral	unknown	unknown	unknown	Stage IIIC	3.20616	5.56578
Alive	NA	2661	2661	WHITE	1	G3	No Macroscopic disease	Bilateral	YES	YES	unknown	Stage IIIC	3.12305	5.58575
Alive	NA	1168	1168	WHITE	0	G3	unknown	unknown	unknown	unknown	unknown	Stage IIIC	3.62048	5.59467
Dead	65	NA	65	WHITE	0	G3	>20 mm	Right	unknown	YES	unknown	Stage IV	3.24767	5.59658
Dead	23	23	23	BLACK OR AFRICAN AMERICAN	1	G3	1-10 mm	Bilateral	unknown	unknown	unknown	Stage IIIC	4.2381	5.61685
Alive	NA	1684	1684	WHITE	0	G3	unknown	Right	NO	NO	unknown	Stage IIIC	3.72856	5.63749
Dead	1511	NA	1511	WHITE	1	G3	1-10 mm	Left	YES	YES	unknown	Stage IIIC	2.46314	5.64592
Dead	1933	1933	1933	WHITE	0	G3	>20 mm	Left	unknown	unknown	unknown	Stage IV	4.29349	5.64661
Dead	1114	1114	1114	WHITE	1	G2	1-10 mm	Bilateral	unknown	unknown	unknown	Stage IV	3.86191	5.64888
Dead	1384	1384	1384	WHITE	1	G3	1-10 mm	Bilateral	unknown	unknown	unknown	Stage IIIC	3.45475	5.65303
Alive	NA	186	186	ASIAN	1	G3	No Macroscopic disease	Right	NO	NO	unknown	Stage IIB	3.71675	5.65967
Dead	1102	1102	1102	WHITE	0	G3	1-10 mm	unknown	unknown	unknown	unknown	Stage IIIC	3.62317	5.67563
Dead	361	NA	361	WHITE	1	G3	>20 mm	Bilateral	unknown	unknown	unknown	Stage IV	3.22532	5.67954
Alive	NA	1658	1658	WHITE	0	G3	No Macroscopic disease	Right	YES	YES	unknown	Stage IIIC	2.93763	5.68016
Alive	NA	783	783	ASIAN	0	G2	No Macroscopic disease	Bilateral	unknown	unknown	unknown	Stage IIC	4.6676	5.70207
Dead	737	737	737	unknown	1	G3	>20 mm	unknown	unknown	unknown	unknown	Stage IIIC	3.4149	5.70363
Alive	NA	1364	1364	WHITE	0	G3	1-10 mm	Bilateral	YES	YES	unknown	Stage IV	4.57019	5.71045
Dead	583	583	583	WHITE	1	G3	1-10 mm	Bilateral	unknown	YES	unknown	Stage IIIC	3.69546	5.71979
Alive	NA	1418	1418	WHITE	1	G3	1-10 mm	Bilateral	unknown	unknown	unknown	Stage IIIC	3.31674	5.72065
Dead	1451	1451	1451	BLACK OR AFRICAN AMERICAN	1	G3	1-10 mm	Left	unknown	unknown	unknown	Stage IIIC	4.03766	5.72342
Dead	1279	1126	1279	WHITE	0	G3	1-10 mm	Right	unknown	unknown	unknown	Stage IIIC	3.29275	5.74574
Alive	NA	1736	1736	WHITE	0	G3	unknown	Bilateral	unknown	unknown	unknown	Stage IIIC	3.2289	5.74977
Alive	NA	915	915	unknown	1	G3	>20 mm	unknown	YES	YES	unknown	Stage IIIC	3.3162	5.75905
Alive	NA	1144	1144	WHITE	1	G3	>20 mm	unknown	unknown	unknown	unknown	Stage IIIC	4.51224	5.77029
Alive	NA	360	360	BLACK OR AFRICAN AMERICAN	1	G3	>20 mm	Bilateral	unknown	unknown	unknown	Stage IIIC	3.55876	5.77339
Dead	976	966	976	WHITE	0	G3	1-10 mm	Right	YES	YES	unknown	Stage IIIC	4.60863	5.78498
Alive	NA	886	886	WHITE	1	G3	1-10 mm	Left	YES	YES	unknown	Stage IIIC	2.84127	5.78583
Alive	NA	265	265	WHITE	0	G3	1-10 mm	Bilateral	unknown	unknown	unknown	Stage IIIC	3.34754	5.79733
Alive	NA	3096	3096	WHITE	1	G3	>20 mm	Left	YES	YES	unknown	Stage IIIC	4.1034	5.80219
Alive	NA	253	253	WHITE	0	G3	1-10 mm	Bilateral	unknown	YES	unknown	Stage IIIC	3.4949	5.80261
Dead	627	627	627	WHITE	1	G3	1-10 mm	unknown	unknown	unknown	unknown	Stage IIIC	3.69136	5.83243
Alive	NA	183	183	WHITE	1	G3	1-10 mm	Bilateral	unknown	unknown	unknown	Stage IIIC	3.25977	5.84604
Alive	NA	547	547	WHITE	0	G3	11-20 mm	Bilateral	YES	YES	unknown	Stage IIIC	3.5399	5.84681
Dead	1264	1264	1264	WHITE	0	G3	>20 mm	Bilateral	unknown	unknown	unknown	Stage IV	4.12645	5.84955
Dead	1058	1058	1058	WHITE	1	G3	1-10 mm	Bilateral	unknown	unknown	unknown	Stage IIIC	3.05431	5.85129
Dead	1033	1033	1033	WHITE	1	G3	No Macroscopic disease	Bilateral	unknown	unknown	unknown	Stage IIIC	3.77959	5.86725
Dead	90	90	90	WHITE	1	G3	1-10 mm	Bilateral	unknown	unknown	unknown	Stage IIIC	3.42981	5.87669
Dead	506	506	506	WHITE	0	G3	>20 mm	Right	unknown	unknown	unknown	unknown	2.5482	5.89248
Dead	25	25	25	WHITE	1	G3	>20 mm	Bilateral	unknown	YES	unknown	Stage IIIC	3.72148	5.9026
Alive	NA	81	81	WHITE	0	G3	No Macroscopic disease	Bilateral	unknown	YES	unknown	Stage IV	3.54529	5.9137
Dead	629	629	629	WHITE	0	G3	>20 mm	Bilateral	NO	NO	unknown	Stage IIIC	3.72668	5.95278
Alive	NA	1503	1503	WHITE	0	G3	1-10 mm	Left	YES	YES	unknown	Stage IIIC	3.06178	5.95346
Alive	NA	928	928	WHITE	0	G3	No Macroscopic disease	Right	NO	NO	unknown	Stage IIIA	3.55607	5.96302
Alive	NA	699	699	WHITE	0	G3	1-10 mm	Bilateral	unknown	NO	unknown	Stage IIIC	3.95466	5.98651
Dead	1891	1843	1891	WHITE	1	G3	1-10 mm	Bilateral	unknown	unknown	unknown	Stage IIIC	3.27378	5.99055
Dead	547	NA	547	NATIVE HAWAIIAN OR OTHER PACIFIC ISLANDER	1	G3	1-10 mm	Bilateral	YES	YES	unknown	Stage IIIC	3.0915	5.99243
Dead	914	914	914	WHITE	1	G2	1-10 mm	Bilateral	NO	NO	unknown	Stage IIIC	3.80215	6.00013
Dead	1662	1662	1662	WHITE	0	G2	1-10 mm	Bilateral	unknown	unknown	unknown	Stage IV	2.91141	6.04315
Alive	NA	1342	1342	WHITE	1	G3	unknown	Left	NO	YES	unknown	Stage IIIB	3.80772	6.05994
Alive	NA	61	61	WHITE	0	G3	1-10 mm	Bilateral	YES	YES	unknown	Stage IIIC	3.98335	6.06022
Dead	952	950	952	WHITE	0	G3	>20 mm	Bilateral	unknown	unknown	unknown	Stage IV	4.30437	6.0987
Dead	1946	NA	1946	WHITE	0	G3	>20 mm	Bilateral	unknown	unknown	unknown	Stage IIIC	3.98664	6.13205
Dead	8	8	8	WHITE	1	G3	unknown	Right	unknown	unknown	unknown	Stage IV	3.74708	6.13229
Dead	518	481	518	WHITE	1	G3	>20 mm	Right	unknown	unknown	unknown	Stage IIIC	4.1654	6.16864
Alive	NA	122	122	WHITE	0	G2	1-10 mm	Bilateral	YES	YES	unknown	Stage IIIC	2.99843	6.17071
Dead	1082	NA	1082	WHITE	0	G3	No Macroscopic disease	Left	YES	YES	unknown	Stage IIIC	2.31022	6.22425
Dead	690	690	690	WHITE	0	G3	1-10 mm	Bilateral	unknown	YES	unknown	Stage IIIC	3.36837	6.23024
Alive	NA	220	220	WHITE	0	G3	1-10 mm	Right	unknown	unknown	unknown	Stage IIIC	3.61035	6.23232
Dead	565	565	565	WHITE	1	G3	No Macroscopic disease	Bilateral	unknown	unknown	unknown	Stage IV	3.37006	6.2327
Alive	NA	139	139	WHITE	1	G3	>20 mm	Left	YES	YES	unknown	Stage IIIC	3.26061	6.23808
Dead	885	NA	885	BLACK OR AFRICAN AMERICAN	1	G3	1-10 mm	Bilateral	unknown	unknown	unknown	Stage IV	3.78687	6.28545
Dead	1249	1249	1249	WHITE	0	G3	1-10 mm	Left	unknown	unknown	unknown	Stage IIIC	3.92748	6.34803
Alive	NA	454	454	WHITE	1	G3	No Macroscopic disease	Right	unknown	unknown	unknown	Stage IIIC	3.7167	6.34911
Dead	1247	1247	1247	WHITE	1	G3	1-10 mm	Bilateral	unknown	NO	unknown	Stage IIIC	2.44767	6.3595
Alive	NA	529	529	WHITE	0	G3	1-10 mm	Left	unknown	unknown	unknown	Stage IIIC	3.74418	6.36744
Dead	1484	1484	1484	WHITE	0	G3	unknown	Bilateral	YES	YES	unknown	Stage IIIC	3.26483	6.38279
Alive	NA	1752	1752	WHITE	0	G3	No Macroscopic disease	Bilateral	NO	NO	unknown	Stage IIIC	4.18968	6.38849
Alive	NA	147	147	unknown	0	G3	>20 mm	Bilateral	unknown	YES	unknown	Stage IIIC	3.14061	6.41559
Dead	1484	1484	1484	WHITE	0	G3	1-10 mm	Left	unknown	unknown	unknown	Stage IIIC	4.04387	6.4199
Alive	NA	2521	2521	WHITE	1	G2	unknown	Bilateral	unknown	unknown	unknown	Stage IIIC	2.80898	6.4373
Alive	NA	2780	2780	WHITE	1	G3	11-20 mm	Left	unknown	unknown	unknown	Stage IIIC	3.85534	6.45936
Alive	NA	989	989	WHITE	0	G3	No Macroscopic disease	Bilateral	unknown	unknown	unknown	Stage IIIB	4.15102	6.46348
Alive	NA	262	262	WHITE	0	G3	1-10 mm	Bilateral	unknown	unknown	unknown	Stage IV	3.90582	6.47196
Alive	NA	589	589	ASIAN	0	G3	>20 mm	Bilateral	unknown	unknown	unknown	Stage IIIC	3.88402	6.50424
Alive	NA	1977	1977	WHITE	1	G2	>20 mm	unknown	unknown	NO	unknown	Stage IIIC	3.93332	6.52669
Dead	629	629	629	WHITE	0	G2	1-10 mm	Bilateral	unknown	unknown	unknown	Stage IV	3.05286	6.55245
Dead	1736	1736	1736	WHITE	1	G3	1-10 mm	Bilateral	unknown	YES	unknown	Stage IIIC	3.379	6.55895
Alive	NA	651	651	WHITE	0	G3	1-10 mm	Bilateral	unknown	unknown	unknown	Stage IIIC	3.71786	6.61517
Dead	2009	1979	2009	WHITE	0	G3	1-10 mm	Bilateral	unknown	unknown	unknown	Stage IIIC	3.37778	6.66919
Dead	2561	NA	2561	WHITE	0	G2	1-10 mm	Bilateral	unknown	NO	unknown	Stage IIIB	3.27451	6.79639
Alive	NA	208	208	WHITE	1	G3	1-10 mm	unknown	unknown	unknown	unknown	Stage IIIC	3.31204	6.81521
Dead	863	863	863	WHITE	1	G3	>20 mm	Bilateral	unknown	unknown	unknown	Stage IIIC	3.04566	6.84351
Alive	NA	1233	1233	WHITE	1	G3	1-10 mm	Right	YES	YES	unknown	Stage IIIC	3.08012	6.8574
Dead	568	568	568	WHITE	0	G3	1-10 mm	Bilateral	unknown	YES	unknown	Stage IIIC	4.43713	6.88153
Dead	895	895	895	WHITE	1	G3	>20 mm	unknown	unknown	unknown	unknown	Stage IIIC	3.62539	6.98325
Dead	2717	NA	2717	WHITE	0	G3	1-10 mm	Left	YES	YES	unknown	Stage IV	3.69943	7.03512
Dead	857	857	857	WHITE	1	G3	1-10 mm	Left	unknown	unknown	unknown	Stage IIIC	3.53253	7.06127
Alive	NA	967	967	WHITE	1	G3	No Macroscopic disease	Bilateral	YES	YES	unknown	Stage IIIC	4.30927	7.13813
Dead	949	NA	949	WHITE	0	G3	1-10 mm	Left	unknown	YES	unknown	Stage IV	3.25207	7.14722
Alive	NA	741	741	WHITE	0	G2	1-10 mm	Bilateral	unknown	unknown	unknown	Stage IIIC	3.8316	7.17745
Dead	396	396	396	AMERICAN INDIAN OR ALASKA NATIVE	1	G3	>20 mm	Bilateral	unknown	unknown	unknown	Stage IIIC	3.48934	7.19184
Alive	NA	2143	2143	WHITE	1	G3	1-10 mm	Bilateral	unknown	unknown	unknown	Stage IIIC	3.4013	7.19517
Dead	1354	1354	1354	WHITE	0	unknown	No Macroscopic disease	Bilateral	unknown	unknown	unknown	Stage IIIC	3.17608	7.19831
Alive	NA	374	374	WHITE	0	G2	>20 mm	Bilateral	unknown	unknown	unknown	Stage IIIC	3.70106	7.28054
Alive	NA	181	181	WHITE	0	G3	1-10 mm	Bilateral	unknown	unknown	unknown	Stage IIIC	3.81301	7.38323
Alive	NA	145	145	WHITE	1	G3	1-10 mm	Bilateral	unknown	unknown	unknown	Stage IIIC	3.83369	7.38751
Alive	NA	257	257	WHITE	1	G3	1-10 mm	Bilateral	unknown	unknown	unknown	Stage IIIC	3.62576	7.49806
Dead	563	563	563	WHITE	1	G3	1-10 mm	Bilateral	NO	NO	unknown	Stage IIIC	3.20856	7.65541
Dead	2490	2478	2490	unknown	1	G2	1-10 mm	Bilateral	unknown	unknown	unknown	Stage IIIC	3.556	7.6673
Dead	2097	2097	2097	WHITE	1	G3	1-10 mm	Bilateral	unknown	unknown	unknown	Stage IIIC	3.21488	7.75107
Dead	1354	1354	1354	WHITE	1	GB	1-10 mm	Right	unknown	unknown	unknown	Stage IIIA	3.53457	7.99958
Dead	1767	1767	1767	WHITE	0	G3	1-10 mm	Bilateral	unknown	unknown	unknown	Stage IIIB	3.80188	8.07591
Dead	1380	NA	1380	WHITE	0	G2	No Macroscopic disease	Bilateral	unknown	unknown	unknown	Stage IIIB	3.93061	8.14515
Alive	NA	92	92	WHITE	0	G3	>20 mm	Bilateral	YES	YES	unknown	Stage IV	3.79807	8.59026
Dead	1103	1103	1103	WHITE	0	G3	1-10 mm	Bilateral	unknown	NO	unknown	Stage IIIC	2.90971	9.04829
Alive	NA	338	338	WHITE	0	G1	unknown	Bilateral	YES	YES	unknown	Stage IV	3.91785	9.14843
Alive	NA	36	36	WHITE	1	G3	>20 mm	Left	unknown	YES	unknown	Stage IIIC	4.09937	9.5482

## Sheet: Assignment of variables
status	vital_status	survival_time	days_to_death	days_to_last_followup	race	race_list	age_at_initial_pathologic_diagnosis(0:<60 years; 1:≧60 years)	grade	neoplasm_histologic_grade	residual	tumor_residual_disease	subdivision	anatomic_neoplasm_subdivision	venous	venous_invasion	lymphatic	lymphatic_invasion	radiation	radiation_therapy	stage_event_clinical_stage	stage1	stage	ATG4C	exprSet.ATG4C	CAV1	exprSet.CAV1
0	Alive	145	NA	145	2	WHITE	0	2	G3	1	No Macroscopic disease	3	Bilateral	1	NO	1	NO	3	unknown	Stage IIIC	2	3	1	3.34113	0	1.96743
1	Dead	1123	1123	1089	3	BLACK OR AFRICAN AMERICAN	1	2	G3	4	>20 mm	3	Bilateral	3	unknown	2	YES	3	unknown	Stage IIIC	2	3	0	2.9784	0	2.59155
0	Alive	277	NA	277	2	WHITE	1	2	G3	2	1-10 mm	1	Right	3	unknown	3	unknown	3	unknown	Stage IIIC	2	3	1	3.21013	0	2.66637
1	Dead	636	636	604	2	WHITE	1	2	G3	4	>20 mm	3	Bilateral	3	unknown	3	unknown	3	unknown	Stage IIIC	2	3	1	4.22634	0	2.77443
1	Dead	312	312	312	2	WHITE	1	2	G3	2	1-10 mm	3	Bilateral	3	unknown	2	YES	3	unknown	Stage IIIC	2	3	1	3.16573	0	2.7932
1	Dead	820	820	820	3	BLACK OR AFRICAN AMERICAN	1	2	G3	2	1-10 mm	3	Bilateral	3	unknown	3	unknown	3	unknown	Stage IIIC	2	3	1	3.95251	0	2.80091
0	Alive	2237	NA	2237	2	WHITE	1	2	G3	5	unknown	4	unknown	3	unknown	3	unknown	3	unknown	Stage IIIC	2	3	1	3.72726	0	3.06714
1	Dead	949	949	949	2	WHITE	1	2	G3	4	>20 mm	3	Bilateral	3	unknown	3	unknown	3	unknown	Stage IIIC	2	3	1	3.53293	0	3.08231
1	Dead	871	871	NA	2	WHITE	0	1	G2	2	1-10 mm	4	unknown	3	unknown	3	unknown	3	unknown	Stage IIIC	2	3	1	3.82784	0	3.20595
1	Dead	2400	2400	2400	2	WHITE	0	1	G2	5	unknown	3	Bilateral	2	YES	3	unknown	3	unknown	Stage IIIC	2	3	1	4.12908	0	3.2317
0	Alive	247	NA	247	2	WHITE	0	2	G3	1	No Macroscopic disease	3	Bilateral	3	unknown	3	unknown	3	unknown	Stage IIIC	2	3	0	3.05453	0	3.32902
1	Dead	701	701	NA	2	WHITE	1	2	G3	2	1-10 mm	3	Bilateral	3	unknown	3	unknown	3	unknown	Stage IIIC	2	3	1	3.37263	0	3.33927
1	Dead	24	24	NA	3	BLACK OR AFRICAN AMERICAN	0	3	GB	4	>20 mm	1	Right	3	unknown	3	unknown	2	NO	Stage IV	3	4	1	3.80874	0	3.34362
1	Dead	31	31	31	2	WHITE	1	2	G3	3	11-20 mm	3	Bilateral	3	unknown	3	unknown	3	unknown	Stage IV	3	4	1	3.70863	0	3.35015
0	Alive	245	NA	245	3	BLACK OR AFRICAN AMERICAN	1	2	G3	5	unknown	1	Right	2	YES	2	YES	2	NO	Stage IIIC	2	3	1	3.50485	0	3.38557
1	Dead	1000	1000	982	2	WHITE	0	2	G3	2	1-10 mm	3	Bilateral	1	NO	3	unknown	3	unknown	Stage IIIC	2	3	1	4.46186	0	3.43972
0	Alive	1372	NA	1372	2	WHITE	0	2	G3	4	>20 mm	2	Left	3	unknown	2	YES	3	unknown	Stage IIIC	2	3	0	3.03606	0	3.44544
1	Dead	1579	1579	1579	2	WHITE	0	2	G3	2	1-10 mm	3	Bilateral	3	unknown	3	unknown	3	unknown	Stage IIIC	2	3	1	3.27938	0	3.47029
1	Dead	1157	1157	1157	2	WHITE	1	2	G3	3	11-20 mm	2	Left	3	unknown	3	unknown	3	unknown	Stage IIIC	2	3	1	3.89007	0	3.48154
1	Dead	379	379	379	2	WHITE	1	2	G3	4	>20 mm	2	Left	3	unknown	2	YES	3	unknown	Stage IIIC	2	3	1	4.47916	0	3.54357
0	Alive	165	NA	165	1	ASIAN	0	2	G3	1	No Macroscopic disease	3	Bilateral	1	NO	1	NO	3	unknown	Stage IIIA	2	3	1	4.04685	0	3.56663
1	Dead	1348	1348	NA	2	WHITE	0	2	G3	2	1-10 mm	3	Bilateral	3	unknown	3	unknown	3	unknown	Stage IIC	1	2	1	3.58516	0	3.59624
0	Alive	116	NA	116	2	WHITE	0	2	G3	2	1-10 mm	3	Bilateral	3	unknown	3	unknown	3	unknown	Stage IIIC	2	3	1	3.92915	0	3.60844
0	Alive	763	NA	763	2	WHITE	0	2	G3	1	No Macroscopic disease	3	Bilateral	2	YES	2	YES	3	unknown	Stage IIIC	2	3	0	2.9406	0	3.63543
1	Dead	524	524	524	2	WHITE	0	2	G3	2	1-10 mm	3	Bilateral	3	unknown	3	unknown	3	unknown	Stage IIIB	2	3	1	4.17647	0	3.64104
0	Alive	679	NA	679	2	WHITE	1	2	G3	3	11-20 mm	3	Bilateral	2	YES	2	YES	3	unknown	Stage IIIC	2	3	1	3.511	0	3.71476
1	Dead	286	286	NA	2	WHITE	1	2	G3	5	unknown	1	Right	3	unknown	3	unknown	3	unknown	Stage IIIC	2	3	1	3.50167	0	3.72483
0	Alive	195	NA	195	2	WHITE	1	2	G3	1	No Macroscopic disease	1	Right	3	unknown	3	unknown	3	unknown	Stage IIIC	2	3	1	3.19884	0	3.73425
0	Alive	643	NA	643	2	WHITE	0	2	G3	2	1-10 mm	3	Bilateral	2	YES	2	YES	3	unknown	Stage IIIC	2	3	1	3.89726	0	3.7381
1	Dead	594	594	594	2	WHITE	1	2	G3	2	1-10 mm	3	Bilateral	3	unknown	3	unknown	3	unknown	Stage IIIC	2	3	1	3.42905	0	3.75368
1	Dead	1018	1018	NA	2	WHITE	0	2	G3	3	11-20 mm	2	Left	3	unknown	2	YES	3	unknown	Stage IIIC	2	3	1	4.09102	0	3.75881
0	Alive	1277	NA	1277	2	WHITE	0	2	G3	1	No Macroscopic disease	2	Left	3	unknown	1	NO	3	unknown	Stage IIC	1	2	1	3.55785	0	3.7595
1	Dead	1815	1815	1815	3	BLACK OR AFRICAN AMERICAN	0	1	G2	2	1-10 mm	3	Bilateral	3	unknown	3	unknown	3	unknown	Stage IIIC	2	3	1	3.66545	0	3.79781
1	Dead	949	949	946	2	WHITE	0	3	GX	2	1-10 mm	3	Bilateral	3	unknown	3	unknown	3	unknown	Stage IIIC	2	3	1	3.79523	0	3.81298
1	Dead	624	624	NA	3	BLACK OR AFRICAN AMERICAN	0	3	Preoperative	5	unknown	4	unknown	3	unknown	2	YES	1	YES	NA	4	unknown	1	3.33832	0	3.82239
0	Alive	1993	NA	1993	2	WHITE	1	1	G2	3	11-20 mm	3	Bilateral	1	NO	3	unknown	3	unknown	Stage IIIC	2	3	1	3.22393	0	3.83594
0	Alive	1573	NA	1573	2	WHITE	0	2	G3	1	No Macroscopic disease	3	Bilateral	1	NO	1	NO	3	unknown	Stage IIIC	2	3	1	4.92068	0	3.86637
1	Dead	138	138	NA	2	WHITE	1	2	G3	2	1-10 mm	3	Bilateral	2	YES	2	YES	3	unknown	Stage IIIC	2	3	1	4.32396	0	3.86956
0	Alive	1498	NA	1498	2	WHITE	1	1	G2	2	1-10 mm	3	Bilateral	3	unknown	3	unknown	3	unknown	Stage IIIC	2	3	1	5.25653	0	3.90477
1	Dead	1089	1089	1089	3	BLACK OR AFRICAN AMERICAN	1	2	G3	2	1-10 mm	1	Right	2	YES	2	YES	3	unknown	Stage IIIC	2	3	1	3.81185	0	3.92073
1	Dead	1091	1091	1081	2	WHITE	1	2	G3	1	No Macroscopic disease	3	Bilateral	3	unknown	3	unknown	3	unknown	Stage IIIC	2	3	1	4.11407	0	3.92416
0	Alive	932	NA	932	1	ASIAN	0	1	G2	1	No Macroscopic disease	3	Bilateral	2	YES	2	YES	3	unknown	Stage IIC	1	2	0	2.58691	0	3.93983
0	Alive	379	NA	379	2	WHITE	1	2	G3	1	No Macroscopic disease	3	Bilateral	1	NO	1	NO	3	unknown	Stage IIIC	2	3	1	4.32145	0	3.94354
1	Dead	1364	1364	1364	2	WHITE	0	2	G3	2	1-10 mm	3	Bilateral	3	unknown	3	unknown	3	unknown	Stage IIIA	2	3	1	3.25237	0	3.95138
1	Dead	462	462	462	2	WHITE	1	2	G3	2	1-10 mm	3	Bilateral	3	unknown	3	unknown	3	unknown	Stage IIIC	2	3	1	3.39753	0	3.95494
0	Alive	527	NA	527	2	WHITE	1	2	G3	4	>20 mm	3	Bilateral	3	unknown	3	unknown	3	unknown	Stage IIIC	2	3	1	3.52233	0	3.95775
0	Alive	168	NA	168	2	WHITE	1	2	G3	2	1-10 mm	3	Bilateral	3	unknown	2	YES	3	unknown	Stage IIIC	2	3	0	2.69707	0	3.95944
1	Dead	1102	1102	NA	2	WHITE	0	2	G3	2	1-10 mm	3	Bilateral	3	unknown	3	unknown	3	unknown	Stage IIIC	2	3	1	3.63665	0	3.97092
1	Dead	695	695	695	2	WHITE	0	2	G3	1	No Macroscopic disease	3	Bilateral	1	NO	1	NO	3	unknown	Stage IIIB	2	3	1	4.2981	0	3.98402
0	Alive	869	NA	869	2	WHITE	0	2	G3	2	1-10 mm	3	Bilateral	3	unknown	3	unknown	3	unknown	Stage IIIC	2	3	0	3.0424	1	3.98659
0	Alive	797	NA	797	2	WHITE	1	2	G3	1	No Macroscopic disease	1	Right	3	unknown	3	unknown	3	unknown	Stage IIB	1	2	0	2.8718	1	4.00973
0	Alive	3825	NA	3825	2	WHITE	1	2	G3	5	unknown	2	Left	3	unknown	3	unknown	3	unknown	Stage IV	3	4	0	3.13681	1	4.03785
0	Alive	1919	NA	1919	2	WHITE	0	2	G3	1	No Macroscopic disease	3	Bilateral	2	YES	2	YES	3	unknown	Stage IIIC	2	3	1	3.89242	1	4.04099
0	Alive	184	NA	184	2	WHITE	0	2	G3	5	unknown	3	Bilateral	3	unknown	3	unknown	3	unknown	Stage IIIC	2	3	1	3.42145	1	4.04952
0	Alive	947	NA	947	2	WHITE	1	2	G3	5	unknown	2	Left	3	unknown	1	NO	3	unknown	Stage IIIB	2	3	1	3.63123	1	4.05274
0	Alive	133	NA	133	4	unknown	0	2	G3	2	1-10 mm	3	Bilateral	3	unknown	2	YES	3	unknown	Stage IIIC	2	3	1	3.79739	1	4.08186
0	Alive	192	NA	192	2	WHITE	0	2	G3	2	1-10 mm	3	Bilateral	3	unknown	2	YES	3	unknown	Stage IIIC	2	3	1	3.32827	1	4.08822
0	Alive	1357	NA	1357	2	WHITE	1	2	G3	2	1-10 mm	3	Bilateral	3	unknown	2	YES	3	unknown	Stage IIA	1	2	0	2.47263	1	4.09087
1	Dead	2634	2634	2606	2	WHITE	0	1	G2	4	>20 mm	3	Bilateral	3	unknown	3	unknown	3	unknown	Stage IV	3	4	1	3.86976	1	4.09582
0	Alive	1882	NA	1882	2	WHITE	1	1	G2	1	No Macroscopic disease	3	Bilateral	1	NO	1	NO	3	unknown	Stage IIC	1	2	1	3.91849	1	4.11115
1	Dead	3260	3260	3260	2	WHITE	0	2	G3	2	1-10 mm	3	Bilateral	3	unknown	3	unknown	3	unknown	Stage IIIC	2	3	1	3.36796	1	4.12654
0	Alive	468	NA	468	2	WHITE	0	2	G3	2	1-10 mm	1	Right	3	unknown	3	unknown	3	unknown	Stage IV	3	4	1	3.28077	1	4.12746
1	Dead	887	887	NA	2	WHITE	1	2	G3	3	11-20 mm	1	Right	1	NO	1	NO	3	unknown	Stage IIC	1	2	0	2.724	1	4.12982
1	Dead	1319	1319	1319	3	BLACK OR AFRICAN AMERICAN	0	2	G3	3	11-20 mm	3	Bilateral	3	unknown	3	unknown	3	unknown	Stage IIIC	2	3	1	4.22275	1	4.13392
0	Alive	163	NA	163	2	WHITE	0	2	G3	2	1-10 mm	3	Bilateral	3	unknown	2	YES	3	unknown	Stage IIIC	2	3	1	3.91523	1	4.13398
0	Alive	190	NA	190	3	BLACK OR AFRICAN AMERICAN	1	2	G3	1	No Macroscopic disease	2	Left	1	NO	1	NO	3	unknown	Stage IIA	1	2	1	4.20491	1	4.13454
0	Alive	134	NA	134	2	WHITE	0	2	G3	5	unknown	3	Bilateral	3	unknown	3	unknown	3	unknown	Stage IIIC	2	3	1	3.85791	1	4.13758
1	Dead	1947	1947	1947	2	WHITE	0	2	G3	2	1-10 mm	4	unknown	3	unknown	3	unknown	3	unknown	Stage IIIA	2	3	1	3.3341	1	4.15214
0	Alive	232	NA	232	3	BLACK OR AFRICAN AMERICAN	1	2	G3	4	>20 mm	3	Bilateral	3	unknown	2	YES	3	unknown	Stage IIIC	2	3	0	2.96203	1	4.15962
1	Dead	730	730	549	2	WHITE	1	2	G3	2	1-10 mm	2	Left	3	unknown	3	unknown	3	unknown	Stage IIIC	2	3	1	3.93902	1	4.18152
0	Alive	751	NA	751	2	WHITE	1	2	G3	1	No Macroscopic disease	2	Left	3	unknown	3	unknown	3	unknown	Stage IIC	1	2	1	3.82197	1	4.20354
1	Dead	377	377	377	2	WHITE	0	2	G3	2	1-10 mm	3	Bilateral	3	unknown	3	unknown	3	unknown	Stage IIIC	2	3	1	4.10748	1	4.20827
1	Dead	1799	1799	1732	2	WHITE	1	2	G3	2	1-10 mm	3	Bilateral	3	unknown	3	unknown	3	unknown	Stage IV	3	4	1	3.303	1	4.21203
1	Dead	83	83	83	2	WHITE	1	2	G3	2	1-10 mm	1	Right	3	unknown	3	unknown	3	unknown	Stage IV	3	4	1	3.58004	1	4.21604
0	Alive	5481	NA	5481	2	WHITE	0	2	G3	5	unknown	3	Bilateral	3	unknown	3	unknown	3	unknown	Stage IIIC	2	3	0	2.05429	1	4.22388
0	Alive	571	NA	571	2	WHITE	1	1	G2	2	1-10 mm	3	Bilateral	1	NO	1	NO	3	unknown	Stage IIIC	2	3	1	3.69769	1	4.22995
0	Alive	441	NA	441	2	WHITE	1	2	G3	1	No Macroscopic disease	3	Bilateral	2	YES	2	YES	3	unknown	Stage IIIC	2	3	1	3.42058	1	4.23026
0	Alive	761	NA	761	2	WHITE	1	3	unknown	5	unknown	4	unknown	3	unknown	3	unknown	3	unknown	unknown	4	unknown	1	3.34765	1	4.24559
0	Alive	119	NA	119	1	ASIAN	0	2	G3	4	>20 mm	3	Bilateral	3	unknown	3	unknown	3	unknown	Stage IV	3	4	1	3.32765	1	4.25128
0	Alive	875	NA	875	4	unknown	0	2	G3	5	unknown	3	Bilateral	3	unknown	1	NO	3	unknown	Stage IIIC	2	3	1	3.5987	1	4.25445
0	Alive	277	NA	277	3	BLACK OR AFRICAN AMERICAN	1	3	Post-Adjuvant Therapy	1	R0	4	unknown	3	unknown	1	NO	2	NO	NA	4	unknown	1	3.47615	1	4.27314
0	Alive	1209	NA	1209	2	WHITE	1	2	G3	1	No Macroscopic disease	2	Left	1	NO	1	NO	3	unknown	Stage IIIC	2	3	0	3.09131	1	4.30668
0	Alive	1900	NA	1900	2	WHITE	1	2	G3	4	>20 mm	2	Left	3	unknown	3	unknown	3	unknown	Stage IIIC	2	3	1	4.02784	1	4.33039
1	Dead	1162	1162	239	2	WHITE	1	2	G3	2	1-10 mm	3	Bilateral	3	unknown	3	unknown	3	unknown	Stage IIIC	2	3	1	3.69321	1	4.33739
1	Dead	1024	1024	1024	2	WHITE	1	2	G3	4	>20 mm	3	Bilateral	1	NO	3	unknown	3	unknown	Stage IIIB	2	3	1	3.64407	1	4.34481
0	Alive	655	NA	655	2	WHITE	0	2	G3	4	>20 mm	3	Bilateral	2	YES	2	YES	3	unknown	Stage IIIC	2	3	1	3.811	1	4.36367
0	Alive	1293	NA	1293	2	WHITE	0	2	G3	5	unknown	2	Left	2	YES	2	YES	3	unknown	Stage IIA	1	2	1	3.56223	1	4.36528
1	Dead	1104	1104	1053	2	WHITE	0	2	G3	4	>20 mm	1	Right	3	unknown	2	YES	3	unknown	Stage IIIC	2	3	1	4.11839	1	4.38041
1	Dead	1341	1341	1341	2	WHITE	0	2	G4	2	1-10 mm	2	Left	3	unknown	3	unknown	3	unknown	Stage IIIC	2	3	1	4.06839	1	4.3807
1	Dead	1024	1024	NA	2	WHITE	1	2	G3	2	1-10 mm	3	Bilateral	3	unknown	1	NO	3	unknown	Stage IIIC	2	3	1	3.62615	1	4.38121
0	Alive	163	NA	163	2	WHITE	0	2	G3	1	No Macroscopic disease	1	Right	3	unknown	2	YES	3	unknown	Stage IIIC	2	3	1	4.54936	1	4.38907
1	Dead	731	731	731	2	WHITE	0	2	G3	2	1-10 mm	2	Left	2	YES	2	YES	3	unknown	Stage IIIC	2	3	1	3.89487	1	4.39185
1	Dead	1721	1721	1721	2	WHITE	0	2	G3	5	unknown	3	Bilateral	3	unknown	3	unknown	3	unknown	Stage IIIB	2	3	1	3.35737	1	4.39444
1	Dead	919	919	919	2	WHITE	1	2	G3	2	1-10 mm	3	Bilateral	3	unknown	2	YES	3	unknown	Stage IIIC	2	3	1	4.02093	1	4.40223
1	Dead	9	9	NA	2	WHITE	0	2	G3	4	>20 mm	2	Left	3	unknown	3	unknown	3	unknown	Stage IV	3	4	1	3.24369	1	4.41647
1	Dead	821	821	821	2	WHITE	1	2	G3	2	1-10 mm	3	Bilateral	3	unknown	3	unknown	3	unknown	Stage IV	3	4	0	3.13316	1	4.42014
0	Alive	2141	NA	2141	2	WHITE	1	2	G3	1	No Macroscopic disease	1	Right	3	unknown	3	unknown	3	unknown	Stage IIIC	2	3	1	3.79822	1	4.42528
1	Dead	3224	3224	3224	2	WHITE	0	2	G3	2	1-10 mm	1	Right	3	unknown	2	YES	3	unknown	Stage IIIC	2	3	0	2.76272	1	4.43312
1	Dead	2049	2049	2049	2	WHITE	1	2	G3	4	>20 mm	3	Bilateral	3	unknown	3	unknown	3	unknown	Stage IV	3	4	1	3.64996	1	4.43702
1	Dead	1088	1088	NA	3	BLACK OR AFRICAN AMERICAN	1	2	G3	5	unknown	4	unknown	3	unknown	3	unknown	2	NO	Stage IIIC	2	3	1	3.84846	1	4.43894
0	Alive	1748	NA	1748	2	WHITE	0	2	G3	2	1-10 mm	1	Right	3	unknown	3	unknown	3	unknown	Stage IIIC	2	3	1	3.42647	1	4.44809
1	Dead	676	676	676	3	BLACK OR AFRICAN AMERICAN	0	2	G3	2	1-10 mm	2	Left	3	unknown	3	unknown	3	unknown	Stage IIIC	2	3	1	4.49838	1	4.4496
1	Dead	455	455	455	2	WHITE	0	2	G3	3	11-20 mm	3	Bilateral	3	unknown	3	unknown	3	unknown	Stage IIIC	2	3	1	3.4287	1	4.45745
1	Dead	92	92	92	2	WHITE	1	2	G3	1	No Macroscopic disease	3	Bilateral	3	unknown	3	unknown	3	unknown	Stage IIIC	2	3	1	3.40053	1	4.4585
1	Dead	1336	1336	1224	2	WHITE	1	2	G3	2	1-10 mm	3	Bilateral	1	NO	2	YES	3	unknown	Stage IIIC	2	3	1	3.92147	1	4.47274
1	Dead	1189	1189	NA	2	WHITE	0	2	G3	2	1-10 mm	2	Left	3	unknown	1	NO	3	unknown	Stage IIIC	2	3	1	3.14813	1	4.48266
1	Dead	1688	1688	NA	2	WHITE	0	1	G2	3	11-20 mm	3	Bilateral	3	unknown	3	unknown	3	unknown	Stage IIIC	2	3	0	2.80289	1	4.48989
1	Dead	1446	1446	1446	2	WHITE	0	2	G3	4	>20 mm	1	Right	2	YES	2	YES	3	unknown	Stage IV	3	4	1	3.72039	1	4.49085
1	Dead	1213	1213	1213	2	WHITE	0	2	G3	4	>20 mm	3	Bilateral	3	unknown	3	unknown	3	unknown	Stage IIIC	2	3	1	3.36188	1	4.49593
0	Alive	1722	NA	1722	4	unknown	1	2	G3	4	>20 mm	3	Bilateral	2	YES	2	YES	3	unknown	Stage IIIC	2	3	1	4.77444	1	4.49661
0	Alive	981	NA	981	2	WHITE	1	2	G3	1	No Macroscopic disease	3	Bilateral	3	unknown	3	unknown	3	unknown	Stage IIIC	2	3	0	2.50502	1	4.49967
1	Dead	2028	2028	2028	2	WHITE	0	2	G3	2	1-10 mm	3	Bilateral	3	unknown	3	unknown	3	unknown	Stage IIIC	2	3	1	3.78051	1	4.50615
0	Alive	143	NA	143	2	WHITE	0	3	GX	5	unknown	3	Bilateral	3	unknown	3	unknown	3	unknown	Stage IV	3	4	0	3.11653	1	4.50833
1	Dead	395	395	365	2	WHITE	1	2	G3	2	1-10 mm	3	Bilateral	3	unknown	3	unknown	3	unknown	Stage IIIC	2	3	1	3.29661	1	4.50937
1	Dead	4624	4624	4624	2	WHITE	1	2	G3	2	1-10 mm	3	Bilateral	3	unknown	3	unknown	3	unknown	Stage IIIC	2	3	0	1.92865	1	4.52411
0	Alive	952	NA	952	2	WHITE	1	2	G3	3	11-20 mm	3	Bilateral	2	YES	3	unknown	3	unknown	Stage IIIC	2	3	1	3.688	1	4.52589
1	Dead	24	24	24	2	WHITE	1	2	G3	3	11-20 mm	2	Left	3	unknown	2	YES	3	unknown	Stage IIIC	2	3	1	3.85378	1	4.55453
0	Alive	238	NA	238	2	WHITE	0	2	G3	2	1-10 mm	2	Left	3	unknown	3	unknown	3	unknown	Stage IV	3	4	1	4.21324	1	4.55524
1	Dead	1977	1977	1977	2	WHITE	1	2	G3	3	11-20 mm	3	Bilateral	3	unknown	3	unknown	3	unknown	Stage IIIC	2	3	1	4.14849	1	4.55722
1	Dead	1442	1442	1442	2	WHITE	0	2	G3	2	1-10 mm	3	Bilateral	3	unknown	3	unknown	3	unknown	Stage IIIC	2	3	1	3.45043	1	4.57499
0	Alive	1844	NA	1844	2	WHITE	1	1	G2	2	1-10 mm	3	Bilateral	2	YES	2	YES	3	unknown	Stage IIC	1	2	1	3.60289	1	4.57789
1	Dead	354	354	354	2	WHITE	1	2	G3	4	>20 mm	3	Bilateral	3	unknown	2	YES	3	unknown	Stage IIIC	2	3	0	2.914	1	4.58118
0	Alive	2616	NA	2616	2	WHITE	0	2	G3	4	>20 mm	2	Left	2	YES	2	YES	3	unknown	Stage IIIC	2	3	1	4.00401	1	4.59164
1	Dead	1583	1583	1553	2	WHITE	0	2	G3	2	1-10 mm	3	Bilateral	3	unknown	3	unknown	3	unknown	Stage IIIC	2	3	1	4.02542	1	4.60184
0	Alive	547	NA	547	2	WHITE	0	2	G3	1	No Macroscopic disease	3	Bilateral	1	NO	1	NO	3	unknown	Stage IIIA	2	3	1	4.4395	1	4.60607
0	Alive	78	NA	78	2	WHITE	1	2	G3	1	No Macroscopic disease	2	Left	3	unknown	3	unknown	3	unknown	Stage IIIC	2	3	1	3.97586	1	4.61121
1	Dead	679	679	NA	4	unknown	0	2	G3	2	1-10 mm	3	Bilateral	3	unknown	3	unknown	3	unknown	Stage IV	3	4	1	3.85376	1	4.61368
0	Alive	106	NA	106	2	WHITE	1	2	G3	2	1-10 mm	1	Right	3	unknown	2	YES	3	unknown	Stage IIIC	2	3	1	3.65505	1	4.61589
1	Dead	1720	1720	NA	2	WHITE	0	1	G2	1	No Macroscopic disease	3	Bilateral	3	unknown	1	NO	3	unknown	Stage IIIA	2	3	1	3.45647	1	4.6159
1	Dead	9	9	9	2	WHITE	1	2	G3	2	1-10 mm	3	Bilateral	3	unknown	3	unknown	3	unknown	Stage IIIC	2	3	1	4.03768	1	4.62971
1	Dead	608	608	608	2	WHITE	1	2	G3	4	>20 mm	3	Bilateral	3	unknown	3	unknown	3	unknown	Stage IIIC	2	3	1	3.41996	1	4.63352
0	Alive	848	NA	848	2	WHITE	0	2	G3	2	1-10 mm	3	Bilateral	1	NO	1	NO	3	unknown	Stage IV	3	4	1	3.6032	1	4.63602
0	Alive	3953	NA	3953	2	WHITE	1	2	G3	2	1-10 mm	2	Left	2	YES	2	YES	3	unknown	Stage IIIC	2	3	1	3.55509	1	4.63707
0	Alive	343	NA	343	2	WHITE	0	2	G3	2	1-10 mm	3	Bilateral	3	unknown	2	YES	3	unknown	Stage IV	3	4	1	3.27941	1	4.64463
0	Alive	1053	NA	1053	3	BLACK OR AFRICAN AMERICAN	0	1	G2	1	No Macroscopic disease	3	Bilateral	3	unknown	3	unknown	3	unknown	Stage IIIC	2	3	1	3.62051	1	4.64954
1	Dead	129	129	129	2	WHITE	1	2	G3	4	>20 mm	3	Bilateral	3	unknown	3	unknown	3	unknown	Stage IIIC	2	3	1	3.99553	1	4.65932
1	Dead	1583	1583	1558	2	WHITE	1	2	G3	2	1-10 mm	3	Bilateral	3	unknown	3	unknown	3	unknown	Stage IIIC	2	3	1	4.10686	1	4.67222
1	Dead	1073	1073	1073	2	WHITE	1	2	G3	2	1-10 mm	3	Bilateral	3	unknown	3	unknown	3	unknown	Stage IIIC	2	3	1	3.52673	1	4.67287
1	Dead	1355	1355	1355	2	WHITE	0	2	G3	2	1-10 mm	3	Bilateral	3	unknown	3	unknown	3	unknown	Stage IIIC	2	3	1	3.43966	1	4.67726
1	Dead	1266	1266	NA	2	WHITE	1	1	G2	1	No Macroscopic disease	2	Left	2	YES	2	YES	3	unknown	Stage IIIC	2	3	0	3.13024	1	4.68338
0	Alive	190	NA	190	2	WHITE	1	2	G3	2	1-10 mm	3	Bilateral	3	unknown	2	YES	3	unknown	Stage IIIC	2	3	0	0.793477	1	4.70489
0	Alive	331	NA	331	2	WHITE	0	2	G3	5	unknown	2	Left	3	unknown	3	unknown	3	unknown	Stage IIIC	2	3	0	3.12727	1	4.70751
0	Alive	420	NA	420	2	WHITE	1	2	G3	2	1-10 mm	3	Bilateral	3	unknown	3	unknown	3	unknown	Stage IIIC	2	3	1	4.04379	1	4.72713
0	Alive	130	NA	130	2	WHITE	1	2	G3	2	1-10 mm	1	Right	1	NO	1	NO	3	unknown	Stage IIIC	2	3	1	3.56008	1	4.73023
1	Dead	3337	3337	3337	2	WHITE	0	2	G3	4	>20 mm	3	Bilateral	3	unknown	3	unknown	3	unknown	Stage IV	3	4	1	3.72211	1	4.73582
0	Alive	912	NA	912	2	WHITE	0	2	G3	1	No Macroscopic disease	3	Bilateral	3	unknown	3	unknown	3	unknown	Stage IIIC	2	3	1	4.09624	1	4.73651
1	Dead	1492	1492	1492	2	WHITE	0	2	G3	4	>20 mm	3	Bilateral	3	unknown	3	unknown	3	unknown	Stage IIIC	2	3	1	4.03245	1	4.74041
1	Dead	186	186	186	2	WHITE	1	1	G2	4	>20 mm	4	unknown	3	unknown	1	NO	3	unknown	Stage IV	3	4	1	3.84824	1	4.74373
0	Alive	98	NA	98	2	WHITE	1	2	G3	4	>20 mm	1	Right	3	unknown	2	YES	3	unknown	Stage IIIC	2	3	0	3.0709	1	4.75656
1	Dead	304	304	NA	2	WHITE	0	2	G3	4	>20 mm	3	Bilateral	1	NO	2	YES	3	unknown	Stage IIIC	2	3	1	3.42193	1	4.76479
1	Dead	2154	2154	2154	2	WHITE	0	2	G3	3	11-20 mm	3	Bilateral	3	unknown	3	unknown	3	unknown	Stage IV	3	4	1	3.23206	1	4.77619
1	Dead	608	608	460	2	WHITE	0	2	G3	2	1-10 mm	3	Bilateral	3	unknown	3	unknown	3	unknown	Stage IIIC	2	3	1	3.70527	1	4.78594
0	Alive	772	NA	772	2	WHITE	1	2	G3	1	No Macroscopic disease	1	Right	3	unknown	3	unknown	3	unknown	Stage IIIC	2	3	1	4.38675	1	4.79066
0	Alive	94	NA	94	2	WHITE	0	2	G3	1	No Macroscopic disease	3	Bilateral	3	unknown	3	unknown	3	unknown	Stage IIIC	2	3	1	3.91012	1	4.79402
0	Alive	185	NA	185	2	WHITE	0	2	G3	2	1-10 mm	3	Bilateral	3	unknown	3	unknown	3	unknown	Stage IV	3	4	1	3.82071	1	4.81481
1	Dead	1516	1516	NA	2	WHITE	0	2	G3	1	No Macroscopic disease	1	Right	2	YES	2	YES	3	unknown	Stage IV	3	4	1	4.16055	1	4.81516
0	Alive	596	NA	596	2	WHITE	1	2	G3	4	>20 mm	3	Bilateral	3	unknown	3	unknown	3	unknown	Stage IIIC	2	3	1	4.30851	1	4.82518
1	Dead	479	479	479	2	WHITE	0	2	G3	1	No Macroscopic disease	3	Bilateral	2	YES	3	unknown	3	unknown	Stage IV	3	4	1	3.32591	1	4.82581
1	Dead	1769	1769	1769	3	BLACK OR AFRICAN AMERICAN	1	2	G3	2	1-10 mm	3	Bilateral	3	unknown	3	unknown	3	unknown	Stage IIIC	2	3	0	3.1376	1	4.83146
1	Dead	637	637	637	3	BLACK OR AFRICAN AMERICAN	0	2	G3	2	1-10 mm	3	Bilateral	2	YES	2	YES	3	unknown	Stage IIIC	2	3	1	3.54912	1	4.83186
1	Dead	2688	2688	2688	2	WHITE	1	2	G3	5	unknown	3	Bilateral	3	unknown	3	unknown	3	unknown	Stage IIIC	2	3	1	3.21484	1	4.83289
1	Dead	1499	1499	NA	2	WHITE	1	2	G3	5	unknown	3	Bilateral	2	YES	2	YES	3	unknown	Stage IIC	1	2	0	3.02895	1	4.83371
1	Dead	189	189	189	2	WHITE	0	2	G3	2	1-10 mm	3	Bilateral	3	unknown	3	unknown	3	unknown	Stage IV	3	4	0	2.68145	1	4.83529
1	Dead	820	820	820	2	WHITE	1	2	G3	2	1-10 mm	3	Bilateral	3	unknown	3	unknown	3	unknown	Stage IV	3	4	1	3.66745	1	4.8561
0	Alive	33	NA	33	2	WHITE	1	2	G3	5	unknown	4	unknown	3	unknown	3	unknown	3	unknown	unknown	4	unknown	0	3.04935	1	4.86733
1	Dead	1069	1069	NA	1	ASIAN	0	1	G2	2	1-10 mm	3	Bilateral	2	YES	2	YES	3	unknown	Stage IV	3	4	1	3.31522	1	4.86902
1	Dead	91	91	91	2	WHITE	1	2	G3	4	>20 mm	3	Bilateral	3	unknown	3	unknown	3	unknown	Stage IV	3	4	1	3.75105	1	4.88359
1	Dead	562	562	562	2	WHITE	1	2	G3	4	>20 mm	3	Bilateral	3	unknown	3	unknown	3	unknown	Stage IIIC	2	3	1	3.17119	1	4.88743
1	Dead	1757	1757	NA	2	WHITE	0	2	G3	2	1-10 mm	3	Bilateral	1	NO	1	NO	3	unknown	Stage IIIC	2	3	1	4.04778	1	4.88773
1	Dead	457	457	90	2	WHITE	1	2	G3	3	11-20 mm	3	Bilateral	3	unknown	3	unknown	3	unknown	Stage IIIC	2	3	1	3.80188	1	4.88821
1	Dead	2089	2089	2089	2	WHITE	0	2	G3	1	No Macroscopic disease	2	Left	3	unknown	3	unknown	3	unknown	Stage IIIC	2	3	0	3.04609	1	4.89407
1	Dead	394	394	11	2	WHITE	1	2	G3	2	1-10 mm	3	Bilateral	3	unknown	3	unknown	3	unknown	Stage IIIC	2	3	1	4.07803	1	4.90299
1	Dead	31	31	31	2	WHITE	1	2	G3	2	1-10 mm	2	Left	3	unknown	3	unknown	3	unknown	Stage IV	3	4	1	3.81882	1	4.90448
0	Alive	105	NA	105	2	WHITE	0	2	G3	2	1-10 mm	3	Bilateral	3	unknown	3	unknown	3	unknown	Stage IIIB	2	3	1	3.5434	1	4.90812
1	Dead	346	346	346	3	BLACK OR AFRICAN AMERICAN	0	2	G3	1	No Macroscopic disease	2	Left	1	NO	1	NO	3	unknown	Stage IIIC	2	3	1	3.24098	1	4.91263
1	Dead	3622	3622	NA	2	WHITE	1	2	G3	2	1-10 mm	3	Bilateral	1	NO	1	NO	3	unknown	Stage IIIC	2	3	1	3.26977	1	4.9165
1	Dead	542	542	NA	2	WHITE	1	2	G3	4	>20 mm	3	Bilateral	3	unknown	3	unknown	3	unknown	Stage IIIC	2	3	1	3.49267	1	4.94906
0	Alive	684	NA	684	2	WHITE	0	2	G3	1	No Macroscopic disease	2	Left	2	YES	2	YES	3	unknown	Stage IIIC	2	3	1	3.20502	1	4.95378
1	Dead	528	528	517	1	ASIAN	1	2	G3	4	>20 mm	3	Bilateral	3	unknown	3	unknown	3	unknown	Stage IIIC	2	3	1	4.40487	1	4.96638
1	Dead	1699	1699	1699	2	WHITE	0	2	G3	4	>20 mm	3	Bilateral	3	unknown	3	unknown	3	unknown	Stage IIIC	2	3	1	3.35236	1	4.96731
1	Dead	1229	1229	NA	2	WHITE	1	1	G2	4	>20 mm	2	Left	3	unknown	3	unknown	3	unknown	Stage IIIC	2	3	1	3.3197	1	4.97534
1	Dead	1187	1187	NA	2	WHITE	0	3	GX	3	11-20 mm	3	Bilateral	3	unknown	3	unknown	3	unknown	Stage IIIC	2	3	1	3.38227	1	4.9844
0	Alive	268	NA	268	2	WHITE	0	2	G3	2	1-10 mm	1	Right	3	unknown	3	unknown	3	unknown	Stage IIIC	2	3	1	4.06514	1	4.98708
0	Alive	113	NA	113	2	WHITE	1	2	G3	2	1-10 mm	3	Bilateral	3	unknown	3	unknown	3	unknown	Stage IIIC	2	3	1	3.7862	1	4.99258
1	Dead	1448	1448	1360	2	WHITE	1	1	G2	3	11-20 mm	3	Bilateral	3	unknown	3	unknown	3	unknown	Stage IIIC	2	3	1	3.30144	1	4.99359
0	Alive	885	NA	885	2	WHITE	0	2	G3	2	1-10 mm	3	Bilateral	3	unknown	2	YES	3	unknown	Stage IIIC	2	3	1	3.81524	1	4.99472
0	Alive	243	NA	243	2	WHITE	1	2	G3	4	>20 mm	3	Bilateral	3	unknown	3	unknown	3	unknown	Stage IIIC	2	3	1	3.66445	1	5.00245
1	Dead	1032	1032	1025	2	WHITE	0	1	G2	2	1-10 mm	1	Right	3	unknown	1	NO	3	unknown	Stage IIIC	2	3	1	4.4642	1	5.00392
0	Alive	1455	NA	1455	2	WHITE	0	2	G3	5	unknown	2	Left	3	unknown	3	unknown	3	unknown	Stage IIIC	2	3	0	2.90252	1	5.00868
0	Alive	201	NA	201	2	WHITE	0	2	G3	2	1-10 mm	3	Bilateral	3	unknown	3	unknown	3	unknown	Stage IIIC	2	3	1	3.6713	1	5.01722
1	Dead	1562	1562	1562	2	WHITE	1	2	G3	2	1-10 mm	1	Right	3	unknown	3	unknown	3	unknown	Stage IIIC	2	3	1	3.358	1	5.01963
0	Alive	918	NA	918	4	unknown	0	2	G3	1	No Macroscopic disease	3	Bilateral	2	YES	1	NO	3	unknown	Stage IIIC	2	3	1	3.51915	1	5.02496
1	Dead	1249	1249	945	2	WHITE	1	2	G3	2	1-10 mm	3	Bilateral	3	unknown	3	unknown	3	unknown	Stage IIIC	2	3	1	3.99955	1	5.03044
1	Dead	1161	1161	1161	2	WHITE	0	1	G2	5	unknown	3	Bilateral	3	unknown	3	unknown	3	unknown	Stage IIIC	2	3	1	3.65519	1	5.03343
1	Dead	676	676	676	2	WHITE	0	2	G3	5	unknown	1	Right	2	YES	2	YES	3	unknown	Stage IIC	1	2	1	3.65209	1	5.04017
0	Alive	837	NA	837	2	WHITE	0	3	GX	3	11-20 mm	3	Bilateral	2	YES	2	YES	3	unknown	Stage IIIC	2	3	1	4.10582	1	5.04162
1	Dead	2621	2621	2621	2	WHITE	1	1	G2	3	11-20 mm	2	Left	1	NO	3	unknown	3	unknown	Stage IIIC	2	3	0	3.09587	1	5.04683
1	Dead	962	962	962	1	ASIAN	0	2	G3	4	>20 mm	3	Bilateral	2	YES	2	YES	3	unknown	Stage IIIC	2	3	1	3.65346	1	5.04695
0	Alive	1127	NA	1127	2	WHITE	0	2	G3	2	1-10 mm	3	Bilateral	2	YES	2	YES	3	unknown	Stage IIC	1	2	1	3.24197	1	5.05796
0	Alive	255	NA	255	2	WHITE	1	2	G3	1	No Macroscopic disease	3	Bilateral	3	unknown	3	unknown	3	unknown	Stage IIIC	2	3	1	3.71592	1	5.06382
0	Alive	843	NA	843	2	WHITE	0	2	G3	2	1-10 mm	3	Bilateral	3	unknown	3	unknown	3	unknown	Stage IV	3	4	0	3.10386	1	5.07417
0	Alive	644	NA	644	2	WHITE	0	2	G3	1	No Macroscopic disease	3	Bilateral	3	unknown	3	unknown	3	unknown	Stage IIIC	2	3	1	3.98222	1	5.0908
1	Dead	1158	1158	1158	2	WHITE	1	2	G3	2	1-10 mm	3	Bilateral	1	NO	2	YES	3	unknown	Stage IV	3	4	1	3.26928	1	5.11197
0	Alive	1212	NA	1212	2	WHITE	1	2	G3	3	11-20 mm	3	Bilateral	2	YES	2	YES	3	unknown	Stage IIIC	2	3	1	4.03002	1	5.13844
0	Alive	3525	NA	3525	2	WHITE	0	2	G3	1	No Macroscopic disease	2	Left	2	YES	1	NO	3	unknown	Stage IIIC	2	3	1	3.64098	1	5.13991
0	Alive	67	NA	67	2	WHITE	0	1	G2	5	unknown	3	Bilateral	2	YES	2	YES	3	unknown	Stage IV	3	4	1	4.21504	1	5.1539
1	Dead	1646	1646	1646	3	BLACK OR AFRICAN AMERICAN	0	2	G3	2	1-10 mm	3	Bilateral	3	unknown	3	unknown	3	unknown	Stage IIIC	2	3	0	2.79182	1	5.16204
1	Dead	1163	1163	1163	2	WHITE	0	2	G3	2	1-10 mm	3	Bilateral	3	unknown	3	unknown	3	unknown	Stage IIIC	2	3	1	3.98564	1	5.18095
0	Alive	1296	NA	1296	3	BLACK OR AFRICAN AMERICAN	1	2	G3	1	No Macroscopic disease	3	Bilateral	3	unknown	3	unknown	2	NO	Stage IIIC	2	3	1	3.72887	1	5.1822
0	Alive	127	NA	127	2	WHITE	1	2	G3	2	1-10 mm	3	Bilateral	3	unknown	3	unknown	3	unknown	Stage IV	3	4	1	4.27653	1	5.18654
1	Dead	515	515	514	2	WHITE	0	2	G3	5	unknown	3	Bilateral	2	YES	2	YES	3	unknown	Stage IIIC	2	3	1	4.07864	1	5.19327
1	Dead	1366	1366	1366	2	WHITE	0	2	G3	4	>20 mm	3	Bilateral	1	NO	1	NO	3	unknown	Stage IIIC	2	3	1	4.69979	1	5.1994
1	Dead	197	197	197	2	WHITE	1	2	G3	5	unknown	1	Right	3	unknown	3	unknown	3	unknown	Stage IIIC	2	3	1	3.55004	1	5.20011
1	Dead	555	555	555	2	WHITE	0	1	G2	4	>20 mm	3	Bilateral	3	unknown	3	unknown	3	unknown	Stage IIIC	2	3	1	3.91457	1	5.21314
0	Alive	1364	NA	1364	2	WHITE	0	2	G3	2	1-10 mm	3	Bilateral	3	unknown	3	unknown	3	unknown	Stage IV	3	4	0	2.99096	1	5.21327
0	Alive	128	NA	128	2	WHITE	1	2	G3	2	1-10 mm	3	Bilateral	3	unknown	3	unknown	3	unknown	Stage IIIC	2	3	1	3.46975	1	5.21346
0	Alive	1367	NA	1367	2	WHITE	0	2	G3	2	1-10 mm	3	Bilateral	3	unknown	3	unknown	3	unknown	Stage IIIC	2	3	1	4.13399	1	5.21358
1	Dead	1064	1064	1064	2	WHITE	0	2	G3	2	1-10 mm	3	Bilateral	3	unknown	3	unknown	3	unknown	Stage IIIC	2	3	1	3.92834	1	5.21548
1	Dead	61	61	NA	2	WHITE	1	2	G3	5	unknown	3	Bilateral	3	unknown	3	unknown	3	unknown	Stage IIIC	2	3	0	2.78434	1	5.21623
0	Alive	956	NA	956	2	WHITE	0	2	G3	3	11-20 mm	3	Bilateral	2	YES	2	YES	3	unknown	Stage IIIC	2	3	1	4.24731	1	5.21989
1	Dead	2742	2742	2742	2	WHITE	0	2	G3	5	unknown	3	Bilateral	3	unknown	3	unknown	3	unknown	Stage IIIB	2	3	1	3.8707	1	5.23228
0	Alive	932	NA	932	2	WHITE	1	1	G2	5	unknown	2	Left	2	YES	2	YES	3	unknown	Stage IIC	1	2	1	3.40415	1	5.23963
1	Dead	2467	2467	2467	2	WHITE	0	2	G3	2	1-10 mm	3	Bilateral	3	unknown	3	unknown	3	unknown	Stage IIIC	2	3	1	3.83363	1	5.25586
1	Dead	1259	1259	1259	2	WHITE	1	2	G3	2	1-10 mm	2	Left	3	unknown	2	YES	3	unknown	Stage IIIC	2	3	1	3.82364	1	5.25672
0	Alive	816	NA	816	2	WHITE	0	2	G3	2	1-10 mm	2	Left	3	unknown	3	unknown	3	unknown	Stage IIIC	2	3	1	3.52357	1	5.26036
0	Alive	176	NA	176	3	BLACK OR AFRICAN AMERICAN	0	2	G3	1	No Macroscopic disease	3	Bilateral	1	NO	1	NO	3	unknown	Stage IIIB	2	3	1	3.43299	1	5.26918
0	Alive	194	NA	194	2	WHITE	0	2	G3	2	1-10 mm	3	Bilateral	3	unknown	3	unknown	3	unknown	Stage IV	3	4	1	3.77859	1	5.2746
1	Dead	1199	1199	1190	2	WHITE	1	1	G2	3	11-20 mm	1	Right	3	unknown	3	unknown	3	unknown	Stage IIIC	2	3	1	3.58651	1	5.28419
1	Dead	637	637	637	2	WHITE	0	2	G3	1	No Macroscopic disease	3	Bilateral	2	YES	2	YES	3	unknown	Stage IIIC	2	3	1	3.87906	1	5.28955
1	Dead	11	11	11	2	WHITE	0	2	G3	2	1-10 mm	1	Right	3	unknown	3	unknown	3	unknown	Stage IIIC	2	3	1	3.48948	1	5.29378
1	Dead	1046	1046	NA	2	WHITE	1	2	G3	2	1-10 mm	2	Left	3	unknown	2	YES	3	unknown	Stage IIIC	2	3	1	3.66869	1	5.29453
0	Alive	2338	NA	2338	2	WHITE	0	1	G2	1	No Macroscopic disease	3	Bilateral	1	NO	3	unknown	3	unknown	Stage IIC	1	2	1	3.87866	1	5.32059
1	Dead	681	681	681	2	WHITE	1	3	GX	5	unknown	4	unknown	3	unknown	3	unknown	3	unknown	Stage IV	3	4	1	3.55039	1	5.32282
0	Alive	89	NA	89	2	WHITE	1	2	G3	1	No Macroscopic disease	3	Bilateral	3	unknown	1	NO	3	unknown	Stage IIIC	2	3	1	3.92076	1	5.33008
0	Alive	999	NA	999	2	WHITE	0	2	G3	4	>20 mm	3	Bilateral	3	unknown	3	unknown	3	unknown	Stage IV	3	4	1	3.37546	1	5.33255
1	Dead	1955	1955	1955	2	WHITE	0	2	G3	2	1-10 mm	3	Bilateral	3	unknown	3	unknown	3	unknown	Stage IIIC	2	3	1	3.5132	1	5.33399
1	Dead	1059	1059	1059	2	WHITE	1	2	G3	4	>20 mm	3	Bilateral	3	unknown	2	YES	3	unknown	Stage IIIC	2	3	1	3.61565	1	5.35006
1	Dead	1278	1278	1278	2	WHITE	1	2	G3	1	No Macroscopic disease	3	Bilateral	3	unknown	3	unknown	3	unknown	Stage IIIC	2	3	1	3.53578	1	5.3501
1	Dead	1579	1579	1579	2	WHITE	0	2	G3	2	1-10 mm	3	Bilateral	1	NO	1	NO	3	unknown	Stage IIIC	2	3	1	4.05714	1	5.35055
1	Dead	1169	1169	NA	2	WHITE	1	2	G3	2	1-10 mm	1	Right	1	NO	1	NO	3	unknown	Stage IIIC	2	3	1	3.74345	1	5.35103
0	Alive	686	NA	686	1	ASIAN	0	2	G3	4	>20 mm	3	Bilateral	3	unknown	3	unknown	3	unknown	Stage IIIC	2	3	1	4.06397	1	5.35195
1	Dead	951	951	889	2	WHITE	0	1	G2	2	1-10 mm	3	Bilateral	3	unknown	3	unknown	3	unknown	Stage IIIC	2	3	1	4.0309	1	5.36371
0	Alive	2259	NA	2259	2	WHITE	1	2	G3	2	1-10 mm	3	Bilateral	3	unknown	3	unknown	3	unknown	Stage IIIC	2	3	1	3.49604	1	5.36574
0	Alive	1386	NA	1386	2	WHITE	0	2	G3	1	No Macroscopic disease	3	Bilateral	2	YES	2	YES	3	unknown	Stage IIIC	2	3	0	3.13876	1	5.37547
1	Dead	1324	1324	1324	2	WHITE	0	2	G3	2	1-10 mm	3	Bilateral	3	unknown	1	NO	3	unknown	Stage IIIC	2	3	1	4.6248	1	5.37702
0	Alive	239	NA	239	2	WHITE	1	2	G3	3	11-20 mm	3	Bilateral	3	unknown	3	unknown	3	unknown	Stage IIIC	2	3	1	3.9508	1	5.38389
0	Alive	204	NA	204	1	ASIAN	0	2	G3	5	unknown	3	Bilateral	1	NO	1	NO	3	unknown	Stage IIIC	2	3	1	3.8687	1	5.39142
1	Dead	1446	1446	1446	2	WHITE	0	2	G3	1	No Macroscopic disease	3	Bilateral	3	unknown	2	YES	3	unknown	Stage IIB	1	2	1	3.7345	1	5.4014
0	Alive	1652	NA	1652	2	WHITE	0	2	G3	5	unknown	4	unknown	3	unknown	3	unknown	3	unknown	Stage IIIC	2	3	1	3.65815	1	5.40412
1	Dead	1369	1369	1369	2	WHITE	1	2	G3	2	1-10 mm	3	Bilateral	3	unknown	3	unknown	3	unknown	Stage IIIC	2	3	0	2.82943	1	5.42677
1	Dead	883	883	883	1	AMERICAN INDIAN OR ALASKA NATIVE	0	2	G3	1	No Macroscopic disease	3	Bilateral	3	unknown	3	unknown	3	unknown	Stage IIIC	2	3	1	3.36564	1	5.42945
0	Alive	16	NA	16	2	WHITE	1	2	G3	2	1-10 mm	1	Right	1	NO	1	NO	3	unknown	Stage IIC	1	2	0	2.72368	1	5.44691
1	Dead	1470	1470	1435	2	WHITE	0	1	G2	2	1-10 mm	3	Bilateral	3	unknown	3	unknown	3	unknown	Stage IIIC	2	3	1	3.64523	1	5.45004
1	Dead	1620	1620	1620	2	WHITE	0	2	G3	4	>20 mm	3	Bilateral	3	unknown	3	unknown	3	unknown	Stage IIIC	2	3	0	3.09875	1	5.46309
0	Alive	1919	NA	1919	2	WHITE	1	2	G3	1	No Macroscopic disease	3	Bilateral	1	NO	1	NO	3	unknown	Stage IV	3	4	1	4.36474	1	5.46398
0	Alive	168	NA	168	2	WHITE	0	2	G3	2	1-10 mm	3	Bilateral	2	YES	2	YES	3	unknown	Stage IIIC	2	3	1	3.54449	1	5.4697
0	Alive	2032	NA	2032	3	BLACK OR AFRICAN AMERICAN	0	1	G2	2	1-10 mm	3	Bilateral	3	unknown	3	unknown	3	unknown	Stage IIC	1	2	1	3.56111	1	5.47176
1	Dead	446	446	356	2	WHITE	1	2	G3	1	No Macroscopic disease	3	Bilateral	3	unknown	3	unknown	3	unknown	Stage IIIC	2	3	1	3.30903	1	5.48136
0	Alive	128	NA	128	2	WHITE	1	2	G3	4	>20 mm	4	unknown	3	unknown	3	unknown	3	unknown	Stage IIIC	2	3	1	3.19724	1	5.48529
0	Alive	180	NA	180	2	WHITE	0	2	G3	4	>20 mm	4	unknown	3	unknown	3	unknown	3	unknown	Stage IIIC	2	3	1	3.5885	1	5.48696
0	Alive	3532	NA	3532	2	WHITE	0	2	G3	2	1-10 mm	3	Bilateral	3	unknown	3	unknown	3	unknown	Stage IIIC	2	3	1	3.8334	1	5.48984
1	Dead	53	53	53	2	WHITE	0	2	G3	3	11-20 mm	3	Bilateral	2	YES	2	YES	3	unknown	Stage IIIC	2	3	1	3.3621	1	5.49396
0	Alive	2099	NA	2099	2	WHITE	1	2	G3	1	No Macroscopic disease	3	Bilateral	3	unknown	3	unknown	3	unknown	Stage IV	3	4	1	3.2534	1	5.51402
1	Dead	336	336	336	2	WHITE	1	2	G3	3	11-20 mm	3	Bilateral	3	unknown	3	unknown	3	unknown	Stage IIIC	2	3	1	4.05524	1	5.51886
1	Dead	1155	1155	1124	2	WHITE	1	2	G3	2	1-10 mm	3	Bilateral	3	unknown	3	unknown	3	unknown	Stage IIIC	2	3	1	3.34596	1	5.54397
0	Alive	224	NA	224	2	WHITE	0	2	G3	2	1-10 mm	3	Bilateral	3	unknown	3	unknown	3	unknown	Stage IV	3	4	1	3.37635	1	5.54773
1	Dead	679	679	679	2	WHITE	1	2	G3	2	1-10 mm	3	Bilateral	3	unknown	3	unknown	3	unknown	Stage IIIC	2	3	1	3.20616	1	5.56578
0	Alive	2661	NA	2661	2	WHITE	1	2	G3	1	No Macroscopic disease	3	Bilateral	2	YES	2	YES	3	unknown	Stage IIIC	2	3	0	3.12305	1	5.58575
0	Alive	1168	NA	1168	2	WHITE	0	2	G3	5	unknown	4	unknown	3	unknown	3	unknown	3	unknown	Stage IIIC	2	3	1	3.62048	1	5.59467
1	Dead	65	65	NA	2	WHITE	0	2	G3	4	>20 mm	1	Right	3	unknown	2	YES	3	unknown	Stage IV	3	4	1	3.24767	1	5.59658
1	Dead	23	23	23	3	BLACK OR AFRICAN AMERICAN	1	2	G3	2	1-10 mm	3	Bilateral	3	unknown	3	unknown	3	unknown	Stage IIIC	2	3	1	4.2381	1	5.61685
0	Alive	1684	NA	1684	2	WHITE	0	2	G3	5	unknown	1	Right	1	NO	1	NO	3	unknown	Stage IIIC	2	3	1	3.72856	1	5.63749
1	Dead	1511	1511	NA	2	WHITE	1	2	G3	2	1-10 mm	2	Left	2	YES	2	YES	3	unknown	Stage IIIC	2	3	0	2.46314	1	5.64592
1	Dead	1933	1933	1933	2	WHITE	0	2	G3	4	>20 mm	2	Left	3	unknown	3	unknown	3	unknown	Stage IV	3	4	1	4.29349	1	5.64661
1	Dead	1114	1114	1114	2	WHITE	1	1	G2	2	1-10 mm	3	Bilateral	3	unknown	3	unknown	3	unknown	Stage IV	3	4	1	3.86191	1	5.64888
1	Dead	1384	1384	1384	2	WHITE	1	2	G3	2	1-10 mm	3	Bilateral	3	unknown	3	unknown	3	unknown	Stage IIIC	2	3	1	3.45475	1	5.65303
0	Alive	186	NA	186	1	ASIAN	1	2	G3	1	No Macroscopic disease	1	Right	1	NO	1	NO	3	unknown	Stage IIB	1	2	1	3.71675	1	5.65967
1	Dead	1102	1102	1102	2	WHITE	0	2	G3	2	1-10 mm	4	unknown	3	unknown	3	unknown	3	unknown	Stage IIIC	2	3	1	3.62317	1	5.67563
1	Dead	361	361	NA	2	WHITE	1	2	G3	4	>20 mm	3	Bilateral	3	unknown	3	unknown	3	unknown	Stage IV	3	4	1	3.22532	1	5.67954
0	Alive	1658	NA	1658	2	WHITE	0	2	G3	1	No Macroscopic disease	1	Right	2	YES	2	YES	3	unknown	Stage IIIC	2	3	0	2.93763	1	5.68016
0	Alive	783	NA	783	1	ASIAN	0	1	G2	1	No Macroscopic disease	3	Bilateral	3	unknown	3	unknown	3	unknown	Stage IIC	1	2	1	4.6676	1	5.70207
1	Dead	737	737	737	4	unknown	1	2	G3	4	>20 mm	4	unknown	3	unknown	3	unknown	3	unknown	Stage IIIC	2	3	1	3.4149	1	5.70363
0	Alive	1364	NA	1364	2	WHITE	0	2	G3	2	1-10 mm	3	Bilateral	2	YES	2	YES	3	unknown	Stage IV	3	4	1	4.57019	1	5.71045
1	Dead	583	583	583	2	WHITE	1	2	G3	2	1-10 mm	3	Bilateral	3	unknown	2	YES	3	unknown	Stage IIIC	2	3	1	3.69546	1	5.71979
0	Alive	1418	NA	1418	2	WHITE	1	2	G3	2	1-10 mm	3	Bilateral	3	unknown	3	unknown	3	unknown	Stage IIIC	2	3	1	3.31674	1	5.72065
1	Dead	1451	1451	1451	3	BLACK OR AFRICAN AMERICAN	1	2	G3	2	1-10 mm	2	Left	3	unknown	3	unknown	3	unknown	Stage IIIC	2	3	1	4.03766	1	5.72342
1	Dead	1279	1279	1126	2	WHITE	0	2	G3	2	1-10 mm	1	Right	3	unknown	3	unknown	3	unknown	Stage IIIC	2	3	1	3.29275	1	5.74574
0	Alive	1736	NA	1736	2	WHITE	0	2	G3	5	unknown	3	Bilateral	3	unknown	3	unknown	3	unknown	Stage IIIC	2	3	1	3.2289	1	5.74977
0	Alive	915	NA	915	4	unknown	1	2	G3	4	>20 mm	4	unknown	2	YES	2	YES	3	unknown	Stage IIIC	2	3	1	3.3162	1	5.75905
0	Alive	1144	NA	1144	2	WHITE	1	2	G3	4	>20 mm	4	unknown	3	unknown	3	unknown	3	unknown	Stage IIIC	2	3	1	4.51224	1	5.77029
0	Alive	360	NA	360	3	BLACK OR AFRICAN AMERICAN	1	2	G3	4	>20 mm	3	Bilateral	3	unknown	3	unknown	3	unknown	Stage IIIC	2	3	1	3.55876	1	5.77339
1	Dead	976	976	966	2	WHITE	0	2	G3	2	1-10 mm	1	Right	2	YES	2	YES	3	unknown	Stage IIIC	2	3	1	4.60863	1	5.78498
0	Alive	886	NA	886	2	WHITE	1	2	G3	2	1-10 mm	2	Left	2	YES	2	YES	3	unknown	Stage IIIC	2	3	0	2.84127	1	5.78583
0	Alive	265	NA	265	2	WHITE	0	2	G3	2	1-10 mm	3	Bilateral	3	unknown	3	unknown	3	unknown	Stage IIIC	2	3	1	3.34754	1	5.79733
0	Alive	3096	NA	3096	2	WHITE	1	2	G3	4	>20 mm	2	Left	2	YES	2	YES	3	unknown	Stage IIIC	2	3	1	4.1034	1	5.80219
0	Alive	253	NA	253	2	WHITE	0	2	G3	2	1-10 mm	3	Bilateral	3	unknown	2	YES	3	unknown	Stage IIIC	2	3	1	3.4949	1	5.80261
1	Dead	627	627	627	2	WHITE	1	2	G3	2	1-10 mm	4	unknown	3	unknown	3	unknown	3	unknown	Stage IIIC	2	3	1	3.69136	1	5.83243
0	Alive	183	NA	183	2	WHITE	1	2	G3	2	1-10 mm	3	Bilateral	3	unknown	3	unknown	3	unknown	Stage IIIC	2	3	1	3.25977	1	5.84604
0	Alive	547	NA	547	2	WHITE	0	2	G3	3	11-20 mm	3	Bilateral	2	YES	2	YES	3	unknown	Stage IIIC	2	3	1	3.5399	1	5.84681
1	Dead	1264	1264	1264	2	WHITE	0	2	G3	4	>20 mm	3	Bilateral	3	unknown	3	unknown	3	unknown	Stage IV	3	4	1	4.12645	1	5.84955
1	Dead	1058	1058	1058	2	WHITE	1	2	G3	2	1-10 mm	3	Bilateral	3	unknown	3	unknown	3	unknown	Stage IIIC	2	3	0	3.05431	1	5.85129
1	Dead	1033	1033	1033	2	WHITE	1	2	G3	1	No Macroscopic disease	3	Bilateral	3	unknown	3	unknown	3	unknown	Stage IIIC	2	3	1	3.77959	1	5.86725
1	Dead	90	90	90	2	WHITE	1	2	G3	2	1-10 mm	3	Bilateral	3	unknown	3	unknown	3	unknown	Stage IIIC	2	3	1	3.42981	1	5.87669
1	Dead	506	506	506	2	WHITE	0	2	G3	4	>20 mm	1	Right	3	unknown	3	unknown	3	unknown	unknown	4	unknown	0	2.5482	1	5.89248
1	Dead	25	25	25	2	WHITE	1	2	G3	4	>20 mm	3	Bilateral	3	unknown	2	YES	3	unknown	Stage IIIC	2	3	1	3.72148	1	5.9026
0	Alive	81	NA	81	2	WHITE	0	2	G3	1	No Macroscopic disease	3	Bilateral	3	unknown	2	YES	3	unknown	Stage IV	3	4	1	3.54529	1	5.9137
1	Dead	629	629	629	2	WHITE	0	2	G3	4	>20 mm	3	Bilateral	1	NO	1	NO	3	unknown	Stage IIIC	2	3	1	3.72668	1	5.95278
0	Alive	1503	NA	1503	2	WHITE	0	2	G3	2	1-10 mm	2	Left	2	YES	2	YES	3	unknown	Stage IIIC	2	3	0	3.06178	1	5.95346
0	Alive	928	NA	928	2	WHITE	0	2	G3	1	No Macroscopic disease	1	Right	1	NO	1	NO	3	unknown	Stage IIIA	2	3	1	3.55607	1	5.96302
0	Alive	699	NA	699	2	WHITE	0	2	G3	2	1-10 mm	3	Bilateral	3	unknown	1	NO	3	unknown	Stage IIIC	2	3	1	3.95466	1	5.98651
1	Dead	1891	1891	1843	2	WHITE	1	2	G3	2	1-10 mm	3	Bilateral	3	unknown	3	unknown	3	unknown	Stage IIIC	2	3	1	3.27378	1	5.99055
1	Dead	547	547	NA	1	NATIVE HAWAIIAN OR OTHER PACIFIC ISLANDER	1	2	G3	2	1-10 mm	3	Bilateral	2	YES	2	YES	3	unknown	Stage IIIC	2	3	0	3.0915	1	5.99243
1	Dead	914	914	914	2	WHITE	1	1	G2	2	1-10 mm	3	Bilateral	1	NO	1	NO	3	unknown	Stage IIIC	2	3	1	3.80215	1	6.00013
1	Dead	1662	1662	1662	2	WHITE	0	1	G2	2	1-10 mm	3	Bilateral	3	unknown	3	unknown	3	unknown	Stage IV	3	4	0	2.91141	1	6.04315
0	Alive	1342	NA	1342	2	WHITE	1	2	G3	5	unknown	2	Left	1	NO	2	YES	3	unknown	Stage IIIB	2	3	1	3.80772	1	6.05994
0	Alive	61	NA	61	2	WHITE	0	2	G3	2	1-10 mm	3	Bilateral	2	YES	2	YES	3	unknown	Stage IIIC	2	3	1	3.98335	1	6.06022
1	Dead	952	952	950	2	WHITE	0	2	G3	4	>20 mm	3	Bilateral	3	unknown	3	unknown	3	unknown	Stage IV	3	4	1	4.30437	1	6.0987
1	Dead	1946	1946	NA	2	WHITE	0	2	G3	4	>20 mm	3	Bilateral	3	unknown	3	unknown	3	unknown	Stage IIIC	2	3	1	3.98664	1	6.13205
1	Dead	8	8	8	2	WHITE	1	2	G3	5	unknown	1	Right	3	unknown	3	unknown	3	unknown	Stage IV	3	4	1	3.74708	1	6.13229
1	Dead	518	518	481	2	WHITE	1	2	G3	4	>20 mm	1	Right	3	unknown	3	unknown	3	unknown	Stage IIIC	2	3	1	4.1654	1	6.16864
0	Alive	122	NA	122	2	WHITE	0	1	G2	2	1-10 mm	3	Bilateral	2	YES	2	YES	3	unknown	Stage IIIC	2	3	0	2.99843	1	6.17071
1	Dead	1082	1082	NA	2	WHITE	0	2	G3	1	No Macroscopic disease	2	Left	2	YES	2	YES	3	unknown	Stage IIIC	2	3	0	2.31022	1	6.22425
1	Dead	690	690	690	2	WHITE	0	2	G3	2	1-10 mm	3	Bilateral	3	unknown	2	YES	3	unknown	Stage IIIC	2	3	1	3.36837	1	6.23024
0	Alive	220	NA	220	2	WHITE	0	2	G3	2	1-10 mm	1	Right	3	unknown	3	unknown	3	unknown	Stage IIIC	2	3	1	3.61035	1	6.23232
1	Dead	565	565	565	2	WHITE	1	2	G3	1	No Macroscopic disease	3	Bilateral	3	unknown	3	unknown	3	unknown	Stage IV	3	4	1	3.37006	1	6.2327
0	Alive	139	NA	139	2	WHITE	1	2	G3	4	>20 mm	2	Left	2	YES	2	YES	3	unknown	Stage IIIC	2	3	1	3.26061	1	6.23808
1	Dead	885	885	NA	3	BLACK OR AFRICAN AMERICAN	1	2	G3	2	1-10 mm	3	Bilateral	3	unknown	3	unknown	3	unknown	Stage IV	3	4	1	3.78687	1	6.28545
1	Dead	1249	1249	1249	2	WHITE	0	2	G3	2	1-10 mm	2	Left	3	unknown	3	unknown	3	unknown	Stage IIIC	2	3	1	3.92748	1	6.34803
0	Alive	454	NA	454	2	WHITE	1	2	G3	1	No Macroscopic disease	1	Right	3	unknown	3	unknown	3	unknown	Stage IIIC	2	3	1	3.7167	1	6.34911
1	Dead	1247	1247	1247	2	WHITE	1	2	G3	2	1-10 mm	3	Bilateral	3	unknown	1	NO	3	unknown	Stage IIIC	2	3	0	2.44767	1	6.3595
0	Alive	529	NA	529	2	WHITE	0	2	G3	2	1-10 mm	2	Left	3	unknown	3	unknown	3	unknown	Stage IIIC	2	3	1	3.74418	1	6.36744
1	Dead	1484	1484	1484	2	WHITE	0	2	G3	5	unknown	3	Bilateral	2	YES	2	YES	3	unknown	Stage IIIC	2	3	1	3.26483	1	6.38279
0	Alive	1752	NA	1752	2	WHITE	0	2	G3	1	No Macroscopic disease	3	Bilateral	1	NO	1	NO	3	unknown	Stage IIIC	2	3	1	4.18968	1	6.38849
0	Alive	147	NA	147	4	unknown	0	2	G3	4	>20 mm	3	Bilateral	3	unknown	2	YES	3	unknown	Stage IIIC	2	3	0	3.14061	1	6.41559
1	Dead	1484	1484	1484	2	WHITE	0	2	G3	2	1-10 mm	2	Left	3	unknown	3	unknown	3	unknown	Stage IIIC	2	3	1	4.04387	1	6.4199
0	Alive	2521	NA	2521	2	WHITE	1	1	G2	5	unknown	3	Bilateral	3	unknown	3	unknown	3	unknown	Stage IIIC	2	3	0	2.80898	1	6.4373
0	Alive	2780	NA	2780	2	WHITE	1	2	G3	3	11-20 mm	2	Left	3	unknown	3	unknown	3	unknown	Stage IIIC	2	3	1	3.85534	1	6.45936
0	Alive	989	NA	989	2	WHITE	0	2	G3	1	No Macroscopic disease	3	Bilateral	3	unknown	3	unknown	3	unknown	Stage IIIB	2	3	1	4.15102	1	6.46348
0	Alive	262	NA	262	2	WHITE	0	2	G3	2	1-10 mm	3	Bilateral	3	unknown	3	unknown	3	unknown	Stage IV	3	4	1	3.90582	1	6.47196
0	Alive	589	NA	589	1	ASIAN	0	2	G3	4	>20 mm	3	Bilateral	3	unknown	3	unknown	3	unknown	Stage IIIC	2	3	1	3.88402	1	6.50424
0	Alive	1977	NA	1977	2	WHITE	1	1	G2	4	>20 mm	4	unknown	3	unknown	1	NO	3	unknown	Stage IIIC	2	3	1	3.93332	1	6.52669
1	Dead	629	629	629	2	WHITE	0	1	G2	2	1-10 mm	3	Bilateral	3	unknown	3	unknown	3	unknown	Stage IV	3	4	0	3.05286	1	6.55245
1	Dead	1736	1736	1736	2	WHITE	1	2	G3	2	1-10 mm	3	Bilateral	3	unknown	2	YES	3	unknown	Stage IIIC	2	3	1	3.379	1	6.55895
0	Alive	651	NA	651	2	WHITE	0	2	G3	2	1-10 mm	3	Bilateral	3	unknown	3	unknown	3	unknown	Stage IIIC	2	3	1	3.71786	1	6.61517
1	Dead	2009	2009	1979	2	WHITE	0	2	G3	2	1-10 mm	3	Bilateral	3	unknown	3	unknown	3	unknown	Stage IIIC	2	3	1	3.37778	1	6.66919
1	Dead	2561	2561	NA	2	WHITE	0	1	G2	2	1-10 mm	3	Bilateral	3	unknown	1	NO	3	unknown	Stage IIIB	2	3	1	3.27451	1	6.79639
0	Alive	208	NA	208	2	WHITE	1	2	G3	2	1-10 mm	4	unknown	3	unknown	3	unknown	3	unknown	Stage IIIC	2	3	1	3.31204	1	6.81521
1	Dead	863	863	863	2	WHITE	1	2	G3	4	>20 mm	3	Bilateral	3	unknown	3	unknown	3	unknown	Stage IIIC	2	3	0	3.04566	1	6.84351
0	Alive	1233	NA	1233	2	WHITE	1	2	G3	2	1-10 mm	1	Right	2	YES	2	YES	3	unknown	Stage IIIC	2	3	0	3.08012	1	6.8574
1	Dead	568	568	568	2	WHITE	0	2	G3	2	1-10 mm	3	Bilateral	3	unknown	2	YES	3	unknown	Stage IIIC	2	3	1	4.43713	1	6.88153
1	Dead	895	895	895	2	WHITE	1	2	G3	4	>20 mm	4	unknown	3	unknown	3	unknown	3	unknown	Stage IIIC	2	3	1	3.62539	1	6.98325
1	Dead	2717	2717	NA	2	WHITE	0	2	G3	2	1-10 mm	2	Left	2	YES	2	YES	3	unknown	Stage IV	3	4	1	3.69943	1	7.03512
1	Dead	857	857	857	2	WHITE	1	2	G3	2	1-10 mm	2	Left	3	unknown	3	unknown	3	unknown	Stage IIIC	2	3	1	3.53253	1	7.06127
0	Alive	967	NA	967	2	WHITE	1	2	G3	1	No Macroscopic disease	3	Bilateral	2	YES	2	YES	3	unknown	Stage IIIC	2	3	1	4.30927	1	7.13813
1	Dead	949	949	NA	2	WHITE	0	2	G3	2	1-10 mm	2	Left	3	unknown	2	YES	3	unknown	Stage IV	3	4	1	3.25207	1	7.14722
0	Alive	741	NA	741	2	WHITE	0	1	G2	2	1-10 mm	3	Bilateral	3	unknown	3	unknown	3	unknown	Stage IIIC	2	3	1	3.8316	1	7.17745
1	Dead	396	396	396	1	AMERICAN INDIAN OR ALASKA NATIVE	1	2	G3	4	>20 mm	3	Bilateral	3	unknown	3	unknown	3	unknown	Stage IIIC	2	3	1	3.48934	1	7.19184
0	Alive	2143	NA	2143	2	WHITE	1	2	G3	2	1-10 mm	3	Bilateral	3	unknown	3	unknown	3	unknown	Stage IIIC	2	3	1	3.4013	1	7.19517
1	Dead	1354	1354	1354	2	WHITE	0	3	unknown	1	No Macroscopic disease	3	Bilateral	3	unknown	3	unknown	3	unknown	Stage IIIC	2	3	1	3.17608	1	7.19831
0	Alive	374	NA	374	2	WHITE	0	1	G2	4	>20 mm	3	Bilateral	3	unknown	3	unknown	3	unknown	Stage IIIC	2	3	1	3.70106	1	7.28054
0	Alive	181	NA	181	2	WHITE	0	2	G3	2	1-10 mm	3	Bilateral	3	unknown	3	unknown	3	unknown	Stage IIIC	2	3	1	3.81301	1	7.38323
0	Alive	145	NA	145	2	WHITE	1	2	G3	2	1-10 mm	3	Bilateral	3	unknown	3	unknown	3	unknown	Stage IIIC	2	3	1	3.83369	1	7.38751
0	Alive	257	NA	257	2	WHITE	1	2	G3	2	1-10 mm	3	Bilateral	3	unknown	3	unknown	3	unknown	Stage IIIC	2	3	1	3.62576	1	7.49806
1	Dead	563	563	563	2	WHITE	1	2	G3	2	1-10 mm	3	Bilateral	1	NO	1	NO	3	unknown	Stage IIIC	2	3	1	3.20856	1	7.65541
1	Dead	2490	2490	2478	4	unknown	1	1	G2	2	1-10 mm	3	Bilateral	3	unknown	3	unknown	3	unknown	Stage IIIC	2	3	1	3.556	1	7.6673
1	Dead	2097	2097	2097	2	WHITE	1	2	G3	2	1-10 mm	3	Bilateral	3	unknown	3	unknown	3	unknown	Stage IIIC	2	3	1	3.21488	1	7.75107
1	Dead	1354	1354	1354	2	WHITE	1	3	GB	2	1-10 mm	1	Right	3	unknown	3	unknown	3	unknown	Stage IIIA	2	3	1	3.53457	1	7.99958
1	Dead	1767	1767	1767	2	WHITE	0	2	G3	2	1-10 mm	3	Bilateral	3	unknown	3	unknown	3	unknown	Stage IIIB	2	3	1	3.80188	1	8.07591
1	Dead	1380	1380	NA	2	WHITE	0	1	G2	1	No Macroscopic disease	3	Bilateral	3	unknown	3	unknown	3	unknown	Stage IIIB	2	3	1	3.93061	1	8.14515
0	Alive	92	NA	92	2	WHITE	0	2	G3	4	>20 mm	3	Bilateral	2	YES	2	YES	3	unknown	Stage IV	3	4	1	3.79807	1	8.59026
1	Dead	1103	1103	1103	2	WHITE	0	2	G3	2	1-10 mm	3	Bilateral	3	unknown	1	NO	3	unknown	Stage IIIC	2	3	0	2.90971	1	9.04829
0	Alive	338	NA	338	2	WHITE	0	1	G1	5	unknown	3	Bilateral	2	YES	2	YES	3	unknown	Stage IV	3	4	1	3.91785	1	9.14843
0	Alive	36	NA	36	2	WHITE	1	2	G3	4	>20 mm	2	Left	3	unknown	2	YES	3	unknown	Stage IIIC	2	3	1	4.09937	1	9.5482

## Sheet: COX analysis by SPSS
status	survival_time	race	age_at_initial_pathologic_diagnosis(0:<60 years; 1:≧60 years)	grade	residual	subdivision	venous	lymphatic	radiation	stage1	ATG4C	CAV1
0	145	2	0	2	1	3	1	1	3	2	1	0
1	1123	3	1	2	4	3	3	2	3	2	0	0
0	277	2	1	2	2	1	3	3	3	2	1	0
1	636	2	1	2	4	3	3	3	3	2	1	0
1	312	2	1	2	2	3	3	2	3	2	1	0
1	820	3	1	2	2	3	3	3	3	2	1	0
0	2237	2	1	2	5	4	3	3	3	2	1	0
1	949	2	1	2	4	3	3	3	3	2	1	0
1	871	2	0	1	2	4	3	3	3	2	1	0
1	2400	2	0	1	5	3	2	3	3	2	1	0
0	247	2	0	2	1	3	3	3	3	2	0	0
1	701	2	1	2	2	3	3	3	3	2	1	0
1	24	3	0	3	4	1	3	3	2	3	1	0
1	31	2	1	2	3	3	3	3	3	3	1	0
0	245	3	1	2	5	1	2	2	2	2	1	0
1	1000	2	0	2	2	3	1	3	3	2	1	0
0	1372	2	0	2	4	2	3	2	3	2	0	0
1	1579	2	0	2	2	3	3	3	3	2	1	0
1	1157	2	1	2	3	2	3	3	3	2	1	0
1	379	2	1	2	4	2	3	2	3	2	1	0
0	165	1	0	2	1	3	1	1	3	2	1	0
1	1348	2	0	2	2	3	3	3	3	1	1	0
0	116	2	0	2	2	3	3	3	3	2	1	0
0	763	2	0	2	1	3	2	2	3	2	0	0
1	524	2	0	2	2	3	3	3	3	2	1	0
0	679	2	1	2	3	3	2	2	3	2	1	0
1	286	2	1	2	5	1	3	3	3	2	1	0
0	195	2	1	2	1	1	3	3	3	2	1	0
0	643	2	0	2	2	3	2	2	3	2	1	0
1	594	2	1	2	2	3	3	3	3	2	1	0
1	1018	2	0	2	3	2	3	2	3	2	1	0
0	1277	2	0	2	1	2	3	1	3	1	1	0
1	1815	3	0	1	2	3	3	3	3	2	1	0
1	949	2	0	3	2	3	3	3	3	2	1	0
1	624	3	0	3	5	4	3	2	1	4	1	0
0	1993	2	1	1	3	3	1	3	3	2	1	0
0	1573	2	0	2	1	3	1	1	3	2	1	0
1	138	2	1	2	2	3	2	2	3	2	1	0
0	1498	2	1	1	2	3	3	3	3	2	1	0
1	1089	3	1	2	2	1	2	2	3	2	1	0
1	1091	2	1	2	1	3	3	3	3	2	1	0
0	932	1	0	1	1	3	2	2	3	1	0	0
0	379	2	1	2	1	3	1	1	3	2	1	0
1	1364	2	0	2	2	3	3	3	3	2	1	0
1	462	2	1	2	2	3	3	3	3	2	1	0
0	527	2	1	2	4	3	3	3	3	2	1	0
0	168	2	1	2	2	3	3	2	3	2	0	0
1	1102	2	0	2	2	3	3	3	3	2	1	0
1	695	2	0	2	1	3	1	1	3	2	1	0
0	869	2	0	2	2	3	3	3	3	2	0	1
0	797	2	1	2	1	1	3	3	3	1	0	1
0	3825	2	1	2	5	2	3	3	3	3	0	1
0	1919	2	0	2	1	3	2	2	3	2	1	1
0	184	2	0	2	5	3	3	3	3	2	1	1
0	947	2	1	2	5	2	3	1	3	2	1	1
0	133	4	0	2	2	3	3	2	3	2	1	1
0	192	2	0	2	2	3	3	2	3	2	1	1
0	1357	2	1	2	2	3	3	2	3	1	0	1
1	2634	2	0	1	4	3	3	3	3	3	1	1
0	1882	2	1	1	1	3	1	1	3	1	1	1
1	3260	2	0	2	2	3	3	3	3	2	1	1
0	468	2	0	2	2	1	3	3	3	3	1	1
1	887	2	1	2	3	1	1	1	3	1	0	1
1	1319	3	0	2	3	3	3	3	3	2	1	1
0	163	2	0	2	2	3	3	2	3	2	1	1
0	190	3	1	2	1	2	1	1	3	1	1	1
0	134	2	0	2	5	3	3	3	3	2	1	1
1	1947	2	0	2	2	4	3	3	3	2	1	1
0	232	3	1	2	4	3	3	2	3	2	0	1
1	730	2	1	2	2	2	3	3	3	2	1	1
0	751	2	1	2	1	2	3	3	3	1	1	1
1	377	2	0	2	2	3	3	3	3	2	1	1
1	1799	2	1	2	2	3	3	3	3	3	1	1
1	83	2	1	2	2	1	3	3	3	3	1	1
0	5481	2	0	2	5	3	3	3	3	2	0	1
0	571	2	1	1	2	3	1	1	3	2	1	1
0	441	2	1	2	1	3	2	2	3	2	1	1
0	761	2	1	3	5	4	3	3	3	4	1	1
0	119	1	0	2	4	3	3	3	3	3	1	1
0	875	4	0	2	5	3	3	1	3	2	1	1
0	277	3	1	3	1	4	3	1	2	4	1	1
0	1209	2	1	2	1	2	1	1	3	2	0	1
0	1900	2	1	2	4	2	3	3	3	2	1	1
1	1162	2	1	2	2	3	3	3	3	2	1	1
1	1024	2	1	2	4	3	1	3	3	2	1	1
0	655	2	0	2	4	3	2	2	3	2	1	1
0	1293	2	0	2	5	2	2	2	3	1	1	1
1	1104	2	0	2	4	1	3	2	3	2	1	1
1	1341	2	0	2	2	2	3	3	3	2	1	1
1	1024	2	1	2	2	3	3	1	3	2	1	1
0	163	2	0	2	1	1	3	2	3	2	1	1
1	731	2	0	2	2	2	2	2	3	2	1	1
1	1721	2	0	2	5	3	3	3	3	2	1	1
1	919	2	1	2	2	3	3	2	3	2	1	1
1	9	2	0	2	4	2	3	3	3	3	1	1
1	821	2	1	2	2	3	3	3	3	3	0	1
0	2141	2	1	2	1	1	3	3	3	2	1	1
1	3224	2	0	2	2	1	3	2	3	2	0	1
1	2049	2	1	2	4	3	3	3	3	3	1	1
1	1088	3	1	2	5	4	3	3	2	2	1	1
0	1748	2	0	2	2	1	3	3	3	2	1	1
1	676	3	0	2	2	2	3	3	3	2	1	1
1	455	2	0	2	3	3	3	3	3	2	1	1
1	92	2	1	2	1	3	3	3	3	2	1	1
1	1336	2	1	2	2	3	1	2	3	2	1	1
1	1189	2	0	2	2	2	3	1	3	2	1	1
1	1688	2	0	1	3	3	3	3	3	2	0	1
1	1446	2	0	2	4	1	2	2	3	3	1	1
1	1213	2	0	2	4	3	3	3	3	2	1	1
0	1722	4	1	2	4	3	2	2	3	2	1	1
0	981	2	1	2	1	3	3	3	3	2	0	1
1	2028	2	0	2	2	3	3	3	3	2	1	1
0	143	2	0	3	5	3	3	3	3	3	0	1
1	395	2	1	2	2	3	3	3	3	2	1	1
1	4624	2	1	2	2	3	3	3	3	2	0	1
0	952	2	1	2	3	3	2	3	3	2	1	1
1	24	2	1	2	3	2	3	2	3	2	1	1
0	238	2	0	2	2	2	3	3	3	3	1	1
1	1977	2	1	2	3	3	3	3	3	2	1	1
1	1442	2	0	2	2	3	3	3	3	2	1	1
0	1844	2	1	1	2	3	2	2	3	1	1	1
1	354	2	1	2	4	3	3	2	3	2	0	1
0	2616	2	0	2	4	2	2	2	3	2	1	1
1	1583	2	0	2	2	3	3	3	3	2	1	1
0	547	2	0	2	1	3	1	1	3	2	1	1
0	78	2	1	2	1	2	3	3	3	2	1	1
1	679	4	0	2	2	3	3	3	3	3	1	1
0	106	2	1	2	2	1	3	2	3	2	1	1
1	1720	2	0	1	1	3	3	1	3	2	1	1
1	9	2	1	2	2	3	3	3	3	2	1	1
1	608	2	1	2	4	3	3	3	3	2	1	1
0	848	2	0	2	2	3	1	1	3	3	1	1
0	3953	2	1	2	2	2	2	2	3	2	1	1
0	343	2	0	2	2	3	3	2	3	3	1	1
0	1053	3	0	1	1	3	3	3	3	2	1	1
1	129	2	1	2	4	3	3	3	3	2	1	1
1	1583	2	1	2	2	3	3	3	3	2	1	1
1	1073	2	1	2	2	3	3	3	3	2	1	1
1	1355	2	0	2	2	3	3	3	3	2	1	1
1	1266	2	1	1	1	2	2	2	3	2	0	1
0	190	2	1	2	2	3	3	2	3	2	0	1
0	331	2	0	2	5	2	3	3	3	2	0	1
0	420	2	1	2	2	3	3	3	3	2	1	1
0	130	2	1	2	2	1	1	1	3	2	1	1
1	3337	2	0	2	4	3	3	3	3	3	1	1
0	912	2	0	2	1	3	3	3	3	2	1	1
1	1492	2	0	2	4	3	3	3	3	2	1	1
1	186	2	1	1	4	4	3	1	3	3	1	1
0	98	2	1	2	4	1	3	2	3	2	0	1
1	304	2	0	2	4	3	1	2	3	2	1	1
1	2154	2	0	2	3	3	3	3	3	3	1	1
1	608	2	0	2	2	3	3	3	3	2	1	1
0	772	2	1	2	1	1	3	3	3	2	1	1
0	94	2	0	2	1	3	3	3	3	2	1	1
0	185	2	0	2	2	3	3	3	3	3	1	1
1	1516	2	0	2	1	1	2	2	3	3	1	1
0	596	2	1	2	4	3	3	3	3	2	1	1
1	479	2	0	2	1	3	2	3	3	3	1	1
1	1769	3	1	2	2	3	3	3	3	2	0	1
1	637	3	0	2	2	3	2	2	3	2	1	1
1	2688	2	1	2	5	3	3	3	3	2	1	1
1	1499	2	1	2	5	3	2	2	3	1	0	1
1	189	2	0	2	2	3	3	3	3	3	0	1
1	820	2	1	2	2	3	3	3	3	3	1	1
0	33	2	1	2	5	4	3	3	3	4	0	1
1	1069	1	0	1	2	3	2	2	3	3	1	1
1	91	2	1	2	4	3	3	3	3	3	1	1
1	562	2	1	2	4	3	3	3	3	2	1	1
1	1757	2	0	2	2	3	1	1	3	2	1	1
1	457	2	1	2	3	3	3	3	3	2	1	1
1	2089	2	0	2	1	2	3	3	3	2	0	1
1	394	2	1	2	2	3	3	3	3	2	1	1
1	31	2	1	2	2	2	3	3	3	3	1	1
0	105	2	0	2	2	3	3	3	3	2	1	1
1	346	3	0	2	1	2	1	1	3	2	1	1
1	3622	2	1	2	2	3	1	1	3	2	1	1
1	542	2	1	2	4	3	3	3	3	2	1	1
0	684	2	0	2	1	2	2	2	3	2	1	1
1	528	1	1	2	4	3	3	3	3	2	1	1
1	1699	2	0	2	4	3	3	3	3	2	1	1
1	1229	2	1	1	4	2	3	3	3	2	1	1
1	1187	2	0	3	3	3	3	3	3	2	1	1
0	268	2	0	2	2	1	3	3	3	2	1	1
0	113	2	1	2	2	3	3	3	3	2	1	1
1	1448	2	1	1	3	3	3	3	3	2	1	1
0	885	2	0	2	2	3	3	2	3	2	1	1
0	243	2	1	2	4	3	3	3	3	2	1	1
1	1032	2	0	1	2	1	3	1	3	2	1	1
0	1455	2	0	2	5	2	3	3	3	2	0	1
0	201	2	0	2	2	3	3	3	3	2	1	1
1	1562	2	1	2	2	1	3	3	3	2	1	1
0	918	4	0	2	1	3	2	1	3	2	1	1
1	1249	2	1	2	2	3	3	3	3	2	1	1
1	1161	2	0	1	5	3	3	3	3	2	1	1
1	676	2	0	2	5	1	2	2	3	1	1	1
0	837	2	0	3	3	3	2	2	3	2	1	1
1	2621	2	1	1	3	2	1	3	3	2	0	1
1	962	1	0	2	4	3	2	2	3	2	1	1
0	1127	2	0	2	2	3	2	2	3	1	1	1
0	255	2	1	2	1	3	3	3	3	2	1	1
0	843	2	0	2	2	3	3	3	3	3	0	1
0	644	2	0	2	1	3	3	3	3	2	1	1
1	1158	2	1	2	2	3	1	2	3	3	1	1
0	1212	2	1	2	3	3	2	2	3	2	1	1
0	3525	2	0	2	1	2	2	1	3	2	1	1
0	67	2	0	1	5	3	2	2	3	3	1	1
1	1646	3	0	2	2	3	3	3	3	2	0	1
1	1163	2	0	2	2	3	3	3	3	2	1	1
0	1296	3	1	2	1	3	3	3	2	2	1	1
0	127	2	1	2	2	3	3	3	3	3	1	1
1	515	2	0	2	5	3	2	2	3	2	1	1
1	1366	2	0	2	4	3	1	1	3	2	1	1
1	197	2	1	2	5	1	3	3	3	2	1	1
1	555	2	0	1	4	3	3	3	3	2	1	1
0	1364	2	0	2	2	3	3	3	3	3	0	1
0	128	2	1	2	2	3	3	3	3	2	1	1
0	1367	2	0	2	2	3	3	3	3	2	1	1
1	1064	2	0	2	2	3	3	3	3	2	1	1
1	61	2	1	2	5	3	3	3	3	2	0	1
0	956	2	0	2	3	3	2	2	3	2	1	1
1	2742	2	0	2	5	3	3	3	3	2	1	1
0	932	2	1	1	5	2	2	2	3	1	1	1
1	2467	2	0	2	2	3	3	3	3	2	1	1
1	1259	2	1	2	2	2	3	2	3	2	1	1
0	816	2	0	2	2	2	3	3	3	2	1	1
0	176	3	0	2	1	3	1	1	3	2	1	1
0	194	2	0	2	2	3	3	3	3	3	1	1
1	1199	2	1	1	3	1	3	3	3	2	1	1
1	637	2	0	2	1	3	2	2	3	2	1	1
1	11	2	0	2	2	1	3	3	3	2	1	1
1	1046	2	1	2	2	2	3	2	3	2	1	1
0	2338	2	0	1	1	3	1	3	3	1	1	1
1	681	2	1	3	5	4	3	3	3	3	1	1
0	89	2	1	2	1	3	3	1	3	2	1	1
0	999	2	0	2	4	3	3	3	3	3	1	1
1	1955	2	0	2	2	3	3	3	3	2	1	1
1	1059	2	1	2	4	3	3	2	3	2	1	1
1	1278	2	1	2	1	3	3	3	3	2	1	1
1	1579	2	0	2	2	3	1	1	3	2	1	1
1	1169	2	1	2	2	1	1	1	3	2	1	1
0	686	1	0	2	4	3	3	3	3	2	1	1
1	951	2	0	1	2	3	3	3	3	2	1	1
0	2259	2	1	2	2	3	3	3	3	2	1	1
0	1386	2	0	2	1	3	2	2	3	2	0	1
1	1324	2	0	2	2	3	3	1	3	2	1	1
0	239	2	1	2	3	3	3	3	3	2	1	1
0	204	1	0	2	5	3	1	1	3	2	1	1
1	1446	2	0	2	1	3	3	2	3	1	1	1
0	1652	2	0	2	5	4	3	3	3	2	1	1
1	1369	2	1	2	2	3	3	3	3	2	0	1
1	883	1	0	2	1	3	3	3	3	2	1	1
0	16	2	1	2	2	1	1	1	3	1	0	1
1	1470	2	0	1	2	3	3	3	3	2	1	1
1	1620	2	0	2	4	3	3	3	3	2	0	1
0	1919	2	1	2	1	3	1	1	3	3	1	1
0	168	2	0	2	2	3	2	2	3	2	1	1
0	2032	3	0	1	2	3	3	3	3	1	1	1
1	446	2	1	2	1	3	3	3	3	2	1	1
0	128	2	1	2	4	4	3	3	3	2	1	1
0	180	2	0	2	4	4	3	3	3	2	1	1
0	3532	2	0	2	2	3	3	3	3	2	1	1
1	53	2	0	2	3	3	2	2	3	2	1	1
0	2099	2	1	2	1	3	3	3	3	3	1	1
1	336	2	1	2	3	3	3	3	3	2	1	1
1	1155	2	1	2	2	3	3	3	3	2	1	1
0	224	2	0	2	2	3	3	3	3	3	1	1
1	679	2	1	2	2	3	3	3	3	2	1	1
0	2661	2	1	2	1	3	2	2	3	2	0	1
0	1168	2	0	2	5	4	3	3	3	2	1	1
1	65	2	0	2	4	1	3	2	3	3	1	1
1	23	3	1	2	2	3	3	3	3	2	1	1
0	1684	2	0	2	5	1	1	1	3	2	1	1
1	1511	2	1	2	2	2	2	2	3	2	0	1
1	1933	2	0	2	4	2	3	3	3	3	1	1
1	1114	2	1	1	2	3	3	3	3	3	1	1
1	1384	2	1	2	2	3	3	3	3	2	1	1
0	186	1	1	2	1	1	1	1	3	1	1	1
1	1102	2	0	2	2	4	3	3	3	2	1	1
1	361	2	1	2	4	3	3	3	3	3	1	1
0	1658	2	0	2	1	1	2	2	3	2	0	1
0	783	1	0	1	1	3	3	3	3	1	1	1
1	737	4	1	2	4	4	3	3	3	2	1	1
0	1364	2	0	2	2	3	2	2	3	3	1	1
1	583	2	1	2	2	3	3	2	3	2	1	1
0	1418	2	1	2	2	3	3	3	3	2	1	1
1	1451	3	1	2	2	2	3	3	3	2	1	1
1	1279	2	0	2	2	1	3	3	3	2	1	1
0	1736	2	0	2	5	3	3	3	3	2	1	1
0	915	4	1	2	4	4	2	2	3	2	1	1
0	1144	2	1	2	4	4	3	3	3	2	1	1
0	360	3	1	2	4	3	3	3	3	2	1	1
1	976	2	0	2	2	1	2	2	3	2	1	1
0	886	2	1	2	2	2	2	2	3	2	0	1
0	265	2	0	2	2	3	3	3	3	2	1	1
0	3096	2	1	2	4	2	2	2	3	2	1	1
0	253	2	0	2	2	3	3	2	3	2	1	1
1	627	2	1	2	2	4	3	3	3	2	1	1
0	183	2	1	2	2	3	3	3	3	2	1	1
0	547	2	0	2	3	3	2	2	3	2	1	1
1	1264	2	0	2	4	3	3	3	3	3	1	1
1	1058	2	1	2	2	3	3	3	3	2	0	1
1	1033	2	1	2	1	3	3	3	3	2	1	1
1	90	2	1	2	2	3	3	3	3	2	1	1
1	506	2	0	2	4	1	3	3	3	4	0	1
1	25	2	1	2	4	3	3	2	3	2	1	1
0	81	2	0	2	1	3	3	2	3	3	1	1
1	629	2	0	2	4	3	1	1	3	2	1	1
0	1503	2	0	2	2	2	2	2	3	2	0	1
0	928	2	0	2	1	1	1	1	3	2	1	1
0	699	2	0	2	2	3	3	1	3	2	1	1
1	1891	2	1	2	2	3	3	3	3	2	1	1
1	547	1	1	2	2	3	2	2	3	2	0	1
1	914	2	1	1	2	3	1	1	3	2	1	1
1	1662	2	0	1	2	3	3	3	3	3	0	1
0	1342	2	1	2	5	2	1	2	3	2	1	1
0	61	2	0	2	2	3	2	2	3	2	1	1
1	952	2	0	2	4	3	3	3	3	3	1	1
1	1946	2	0	2	4	3	3	3	3	2	1	1
1	8	2	1	2	5	1	3	3	3	3	1	1
1	518	2	1	2	4	1	3	3	3	2	1	1
0	122	2	0	1	2	3	2	2	3	2	0	1
1	1082	2	0	2	1	2	2	2	3	2	0	1
1	690	2	0	2	2	3	3	2	3	2	1	1
0	220	2	0	2	2	1	3	3	3	2	1	1
1	565	2	1	2	1	3	3	3	3	3	1	1
0	139	2	1	2	4	2	2	2	3	2	1	1
1	885	3	1	2	2	3	3	3	3	3	1	1
1	1249	2	0	2	2	2	3	3	3	2	1	1
0	454	2	1	2	1	1	3	3	3	2	1	1
1	1247	2	1	2	2	3	3	1	3	2	0	1
0	529	2	0	2	2	2	3	3	3	2	1	1
1	1484	2	0	2	5	3	2	2	3	2	1	1
0	1752	2	0	2	1	3	1	1	3	2	1	1
0	147	4	0	2	4	3	3	2	3	2	0	1
1	1484	2	0	2	2	2	3	3	3	2	1	1
0	2521	2	1	1	5	3	3	3	3	2	0	1
0	2780	2	1	2	3	2	3	3	3	2	1	1
0	989	2	0	2	1	3	3	3	3	2	1	1
0	262	2	0	2	2	3	3	3	3	3	1	1
0	589	1	0	2	4	3	3	3	3	2	1	1
0	1977	2	1	1	4	4	3	1	3	2	1	1
1	629	2	0	1	2	3	3	3	3	3	0	1
1	1736	2	1	2	2	3	3	2	3	2	1	1
0	651	2	0	2	2	3	3	3	3	2	1	1
1	2009	2	0	2	2	3	3	3	3	2	1	1
1	2561	2	0	1	2	3	3	1	3	2	1	1
0	208	2	1	2	2	4	3	3	3	2	1	1
1	863	2	1	2	4	3	3	3	3	2	0	1
0	1233	2	1	2	2	1	2	2	3	2	0	1
1	568	2	0	2	2	3	3	2	3	2	1	1
1	895	2	1	2	4	4	3	3	3	2	1	1
1	2717	2	0	2	2	2	2	2	3	3	1	1
1	857	2	1	2	2	2	3	3	3	2	1	1
0	967	2	1	2	1	3	2	2	3	2	1	1
1	949	2	0	2	2	2	3	2	3	3	1	1
0	741	2	0	1	2	3	3	3	3	2	1	1
1	396	1	1	2	4	3	3	3	3	2	1	1
0	2143	2	1	2	2	3	3	3	3	2	1	1
1	1354	2	0	3	1	3	3	3	3	2	1	1
0	374	2	0	1	4	3	3	3	3	2	1	1
0	181	2	0	2	2	3	3	3	3	2	1	1
0	145	2	1	2	2	3	3	3	3	2	1	1
0	257	2	1	2	2	3	3	3	3	2	1	1
1	563	2	1	2	2	3	1	1	3	2	1	1
1	2490	4	1	1	2	3	3	3	3	2	1	1
1	2097	2	1	2	2	3	3	3	3	2	1	1
1	1354	2	1	3	2	1	3	3	3	2	1	1
1	1767	2	0	2	2	3	3	3	3	2	1	1
1	1380	2	0	1	1	3	3	3	3	2	1	1
0	92	2	0	2	4	3	2	2	3	3	1	1
1	1103	2	0	2	2	3	3	1	3	2	0	1
0	338	2	0	1	5	3	2	2	3	3	1	1
0	36	2	1	2	4	2	3	2	3	2	1	1
